# Supplementary material for: Smartphones as a platform for molecular analysis: concepts, methods, devices and future potential
Source: Royal Society of Chemistry journal article supplement (doi:10.1039/d4lc00966e), 2025-01-01
Supplement: d4lc00966e1.xlsx [file d4lc00966e1.xlsx]

## Sheet: Organization
Preface		Category	Topic	Abbreviated
Meta-analysis references have been organized to highlight key attributes (e.g. measurement modality, device design, assay format). In cases where a reference fit multiple categories, the emphasis of the article was the deciding factor for its location in this spreadsheet file (e.g., an article might utilize molecular chromogens, but, if its main innovation is a microfluidic chip, then it will be …		Colorimeteric and Extinction Assays and Imaging	Assays with molecular chromogens	Mol. Chrom.
			Noble metal nanoparticles	Noble NPs
			Lateral flow immunoassays	LFA - Col.
			ELISAs	ELISAs
			Other enzyme-linked assays	Other ELAs
			Light scattering assays	LSA
			Surface plasmon resonance	SPR
		PL Assays and Imaging	Lateral flow immunoassays	LFA - PL
			Other immunoassays	Other Imuno. - PL
			Nucleic acid assays	NA Assays
			Cell/bacteria assays (not microscopy)	Cell-Bac. No Micro.
		Chemiluminescence	Chemiluminescence	CL
			Bioluminescence	BL
			Electrochemiluminescence	ECL
		Microscopy	Colorimetric	Col. - Micro.
			Photoluminescence	PL - Micro.
		Spectrometers	Absorption	Abs - Spec.
			Luminescence	PL - Spec.
		Microfluidics	Microfluidics	Microfluidics

## Sheet: Summary
	Meta analysis
	Section	Colorimetric and extinction assays and imaging							PL assays and imaging				Chemiluminescence			Microscopy		Spectrometers		Microfluidics	Total
	Subsection	Assays w/ molecular chromogens	Nobel metal nanoparticles	Lateral flow immunoassays	ELISAs	Other enzyme-linked assays	Light scattering assays	SPR	Lateral Flow immunoassays	Other immunoassays	NA assays	Cell/bacteria assays	Chemiluminescence	Bioluminescence	Electrochemiluminescence	Colorimetric	Photoluminescence	Absorption	Luminescence	Microfluidics
	No. papers analyzed	164	26	58	9	25	20	21	57	13	30	38	30	17	11	30	29	48	66	41	733
	2017	0	0	4	0	0	0	0	4	1	1	0	0	0	1	0	0	3	2	0	16
Papers Published	2018	12	1	2	0	2	0	1	5	1	5	4	1	2	0	1	1	4	2	2	46
by Year	2019	21	5	6	3	3	2	3	6	4	4	6	5	4	2	2	6	6	8	8	104
	2020	23	4	12	1	4	1	2	2	1	3	10	3	3	1	5	3	10	6	8	102
	2021	27	7	6	2	4	4	6	7	0	6	4	5	5	1	9	7	3	11	7	121
	2022	38	4	10	1	10	7	6	11	2	9	6	2	1	4	2	4	8	15	6	146
	2023	20	2	11	1	1	3	2	8	3	2	6	8	2	2	7	6	7	10	1	102
	2024	23	3	7	1	1	3	1	14	1	0	2	6	0	0	4	2	7	12	9	96
	Apple	58	8	12	5	5	3	5	14	3	5	13	3	4	0	7	11	11	9	9	185
Smartphone	Samsung	42	5	9		3	8	4	3	2	2	7	2	5	3	4	11	5	5	7	127
Brand	Huawei	15	2	9	1	9	6	0	12	2	4	5	9	1	3	3	4	8	16	7	116
	Xiaomi	16	1	6		3	1	2	7	1	1	3	1	1	1	2		11	3	4	64
	Other	17	5	26	1	3	1	0	5	5	7	3	10	7	2	7	7	10	7	14	137
	Unspecified	30	8	18	2	10	2	10	18	3	11	11	5	1	2	8	2	12	27	10	190
	Colorimetric	164	26	58	9	28			11	3		21				3		48	13	12	396
	PL	8	3			3			54	11	24	13					6		63	21	206
	CL			1		1			2	1			30							2	37
Measurement	BL					2			1				0	17						1	21
Modality	Brightfield microscopy					0					2	1				27				1	31
	PL microscopy					0					3					2	23		1		29
	Light scattering					0	20					1									21
	SPR							21												1	22
	Other			5		0			2		1	3	1		11	5			4	3	35
	LED-UV					1			26	6	1						4		52	3	93
	LED-violet								1	1	2						1		2	2	9
	LED-blue								4	1	13	3				2	7		3	8	41
	LED-green								2	1	2	1				2	4		2	0	14
	LED-red								1		1					2				0	4
Light Source	LED-white										1					17			3	2	23
for	Laser diode-UV																1			0	1
PL	Laser diode-violet								2								1			2	5
Measurements	Laser diode-blue									1	3	2					5			1	12
	Laser diode-green										1	1					1		2	0	5
	Laser diode-red										1						2			0	3
	Laser diode-NIR								7		3	1							3	3	17
	Smartphone flashlight								4		1					3	2		3	1	14
	UV lamp	8	3			1			7		1	5								3	28
	Other								3	5	1					2	1		2	0	14
	Fluorescent dye	8							4	7	19	6				1	14		25	15	99
PL:	NA-sensitive dye										5	1					5		2	4	17
Contrast	QD		1						23	2	1	3							6	0	36
Generation	UCNP								6		2	1							3	1	13
	AuNC		2			1			5	1									2		11
	Carbon dot					1			3	1		1							13	1	20
	MOF								2										5		7
	NP								1												1
	Doped Polymer								9							1	11			2	23
	Nanocomposite								12												12
	Other		0						10	3	3	1					1		12	2	32
	Chromogen	40		2		2				1		1				0		7	0	0	53
	Dye: stain or label	38		1	1	2			1			6				8		6	2		65
	Indicator dye	78		0	0	2						4				0		6	1	10	101
Colorimetry:	Chromogen (catalyzed)	12	2	7	7	17			1			4				1		10	2	2	65
Contrast	AuNP		19	37	1	3			8			3				1		10	3	1	86
Generation	Undefined			1								2							1	1	5
	Other		4	14		3			1	1		2				1		2	5		33
	Oligonucleotide		4	5		3	3		8		24		5	2			6	3	2	8	73
Biorecognition	Aptamer		2	2		1	2		4		7		2	1		2		6	2	4	35
Agent	Antibody		1	45	9	14			44	12	1		4	2	3	1	9	6	3	13	167
	Other			1		4	1	5	3	1			9	8	8	2	2	1	5	4	54
	NA virus		2	1		2	1		4		13	1	2	0		1	4	1	1	4	37
	NA bacteria			3		2			2		6	1	0	0			1			2	17
	NA human disease	1		2					1		5	0	3	2	1				1	2	18
	NA other		1									0	2	1			1			1	6
	Protein	12	1	24	4	10	1	4	26	7		1	5	3		1	3	11	9	12	134
	Small molecule	73	7	30	5	14	7	9	23	5	5	2	13	7	9	3	3	18	30	7	270
Analyte	Vapor	11	4															1	3		19
	Inorganic small molecule	5	1										1	1				3	2	1	14
	Cell type											14	0	0		12	6		1	3	36
	Bacteria sp.		1	9		2	2		4	1	2	19	4	0	1	2	1	4		2	54
	Virus		1			1						0	0	0						2	4
	Cell viability	2										1	0	0						0	3
	Ion	48	7	2		1	9	4	3		3	1	1	2		1	1	9	20	6	118
	pH	10		2								0	0	0				1		0	13
	Other	14	2				2	7	1			1	0	1		13	9	7	3		60
	Lateral flow		1	55		3			55		1	2	3	1					2		123
	Microfluidics	3	2		2	2		6		2	9	6	1	1		2	4	4	4	24	72
	Paper	54	7	8	1	10			3	3	3	9	11	3			8	4	22	15	161
Format	Capillary					1		2		4	1	1	0	0					0	0	9
	Simple	72	11			3	18		5	4	11	15	9	1	4	23	15	35	36	1	263
	Multi-well	16	3		6	4			10	2	3	4	7	11	1	2	1	9	2	1	82
	Polymer matrix	12	3				2					1							1		19
	Other	14	0				0	13		1	3	0	1	0	6	3	3		4	1	49
	RGB	138	18	19	4	11	2	5	33	7	10	16	9	10	7	9	8	24	43	17	390
Color Space for	HSV/HSL	28	1	3	1	4	0	4	2		1	5	0	1	1	2		8	5	3	69
Analysis	Grayscale	18	6	31	4	6	16	5	19	4	7	10	5	0	4	4	6	11	15	19	190
	Undefined	7	1	5	1	5	1	5	4	2	12	8	16	6	3	16	13	6	3	2	116
	CIELab	17		2				3	1		1						1	5	3		33
	Other	5	1	10			1		2		1	0	0	0			1	0	2	1	24
	Machine learning	6	5	1			3					1	0	0	1	12	5	2	2	4	42
Quantitation	Analytic calibration	158	22	57	9	14	17	21	57	13	28	31	30	17	10	10	11	45	63	32	645
Method	Counting					1					2	6	0	0		5	10			3	27
	Other											0	0	0		5	3	1	1	2	12
	Photograph	164	26	58	7	25	17	18	57	13	29	38	27	17	11	29	25	48	65	37	711
Camera Mode	Video				2	0	3	3			2	0	3	0		1	5		1	5	25
	PCR					1			2		4		1	0					1	1	10
	LAMP		1			1					8		0	0			1			4	15
	RPA		1	2							1		1	0							5
Nucleic acid	HCR										1		0	0							1
Amplification	CRISPR/Cas								1		4		2	0							7
method	PCR+CRISPR/Cas		1										0	0							1
	RPA+CRISPR/Cas			1					1		5		0	0			2				9
	RCA								1				1	2							4
	RCA+CRISPR/Cas			1									1	0							2
	Other								1		1		1	0				1	1		5
Technology	Aunthentic sample to answer	31	5	9	0	4	11	1	8	3	4	3	2	1	2	7	3	11	9	9	123
Readiness	Aunthentic sample, mix of lab and portable methods	83	17	38	7	13	2	3	38	4	15	19	19	8	4	9	14	26	32	18	369
	Proof of concept	50	4	11	2	8	7	17	14	6	11	16	9	8	5	14	12	11	25	13	243

## Sheet: Mol. Chrom.
Year
2018	2019	2020	2021	2022	2023	2024
https://doi.org/10.1021/acs.inorgchem.8b02564	https://doi.org/10.1016/j.heliyon.2019.e02995	https://doi.org/10.1002/adfm.201905493	https://doi.org/10.1007/s12161-021-02059-4	https://doi.org/10.1016/j.foodchem.2022.133063	https://doi.org/10.1016/j.saa.2022.122096	https://doi.org/10.1016/j.microc.2024.109977
https://doi.org/10.1016/j.tetlet.2018.03.068	https://doi.org/10.1016/j.snb.2019.126653	https://doi.org/10.1007/s11356-019-07368-0	https://doi.org/10.1007/s41664-021-00168-x	https://doi.org/10.1039/D2AN00937D	https://doi.org/10.1016/j.foodchem.2022.134439	https://doi.org/10.1039/D4AY00991F
https://doi.org/10.1016/j.chemosphere.2017.10.057	https://doi.org/10.2116/analsci.18P497	https://doi.org/10.1590/fst.01220	https://doi.org/10.1016/j.cjac.2021.05.002	https://doi.org/10.1520/GTJ20210026	https://doi.org/10.1016/j.snb.2022.133109	https://doi.org/10.1039/D4RA02310B
https://doi.org/10.1007/s11696-018-0528-1	https://doi.org/10.1039/C9AY00720B	https://doi.org/10.1021/acs.jafc.0c03352	https://doi.org/10.1039/D0NJ05948J	https://doi.org/10.1007/s12161-021-02155-5	https://doi.org/10.1016/j.talanta.2022.124168	https://doi.org/10.1007/s11696-024-03600-5
https://doi.org/10.1371/journal.pone.0190233	https://doi.org/10.1021/acsomega.9b01388	https://doi.org/10.3390/chemosensors8010010	https://doi.org/10.1016/j.snb.2020.129037	https://doi.org/10.15330/pcss.23.3.582-589	https://doi.org/10.1016/j.inoche.2022.110252	https://doi.org/10.1016/j.aca.2024.342639
https://doi.org/10.1021/acs.analchem.8b03331	https://doi.org/10.1016/j.fpsl.2018.11.016	https://doi.org/10.1016/j.snb.2020.127956	https://doi.org/10.1080/00032719.2020.1792477	https://doi.org/10.1111/1556-4029.15042	https://doi.org/10.1016/j.snb.2023.134601	https://doi.org/10.1016/j.microc.2024.111068
https://doi.org/10.1021/acsami.7b18121	https://doi.org/10.1021/acs.analchem.9b00549	https://doi.org/10.1002/bab.1898	https://doi.org/10.2166/wst.2021.236	https://doi.org/10.3389/fchem.2022.869086	https://doi.org/10.3390/polym15143098	https://doi.org/10.1007/s11696-024-03560-w
https://doi.org/10.1109/JSEN.2018.2843794	https://doi.org/10.1039/C9AY01235D	https://doi.org/10.1021/acsomega.0c00021	https://doi.org/10.1002/btm2.10176	https://doi.org/10.1080/10739149.2021.1960370	https://doi.org/10.1016/j.talanta.2023.124686	https://doi.org/10.1016/j.saa.2024.124238
https://doi.org/10.1021/acsomega.8b00625	https://doi.org/10.1038/s41598-019-42054-8	https://doi.org/10.15330/pcss.21.4.727-736	https://doi.org/10.3390/chemosensors9080235	https://doi.org/10.1016/j.cej.2022.138281	https://doi.org/10.1016/j.talo.2023.100211	https://doi.org/10.1021/acssensors.3c02673
https://doi.org/10.1021/acs.jchemed.7b00468	https://doi.org/10.1016/j.microc.2019.104200	https://doi.org/10.1016/j.microc.2019.104283	https://doi.org/10.1016/j.bios.2021.113484	https://doi.org/10.1016/j.scp.2022.100808	https://doi.org/10.1039/D2AY02035A	https://doi.org/10.1021/acsbiomaterials.4c00431
https://doi.org/10.1007/s00216-018-0965-2	https://doi.org/10.1016/j.forc.2019.100167	https://doi.org/10.1002/adom.201901969	https://doi.org/10.1002/slct.202100147	https://doi.org/10.3390/molecules27154841	https://doi.org/10.1016/j.dyepig.2023.111210	https://doi.org/10.1016/j.snb.2024.136070
https://doi.org/10.3390/s18093141	https://doi.org/10.1007/s00216-019-02032-5	https://doi.org/10.1016/j.talanta.2020.121271	https://doi.org/10.1039/D1AY00719J	https://doi.org/10.1021/acs.jchemed.1c01120	https://doi.org/10.3390/s23073519	https://doi.org/10.1016/j.snb.2024.136173
	https://doi.org/10.1002/anie.201904416	https://doi.org/10.1016/j.saa.2019.117601	https://doi.org/10.1016/j.measurement.2020.108877	https://doi.org/10.1016/j.dyepig.2022.110674	https://doi.org/10.1016/j.matchemphys.2023.127710	https://doi.org/10.1016/j.foodchem.2024.140239
	https://doi.org/10.3390/chemosensors7030035	https://doi.org/10.1093/nar/gkaa342	https://doi.org/10.1016/j.dyepig.2021.109821	https://doi.org/10.1016/j.snb.2022.132122	https://doi.org/10.1016/j.scp.2023.101175	https://doi.org/10.1016/j.snb.2024.135793
	https://doi.org/10.1007/s00216-019-02172-8	https://doi.org/10.1039/D0LC00028K	https://doi.org/10.1364/OSAC.417889	https://doi.org/10.1007/s44211-022-00146-y	https://doi.org/10.1007/s11696-023-02943-9	https://doi.org/10.1016/j.saa.2024.124807
	https://doi.org/10.1039/C9NJ03954F	https://doi.org/10.1021/acssensors.0c00937	https://doi.org/10.1016/j.snb.2021.129958	https://doi.org/10.1016/j.jece.2022.107650	https://doi.org/10.1016/j.jhazmat.2023.132510	https://doi.org/10.1007/s00216-024-05401-x
	https://doi.org/10.1039/C9CP00002J	https://doi.org/10.1016/j.microc.2020.104968	https://doi.org/10.1016/j.molstruc.2020.129249	https://doi.org/10.1007/s00216-021-03839-x	https://doi.org/10.1016/j.ijbiomac.2023.126065	https://doi.org/10.1007/s00604-024-06463-5
	https://doi.org/10.1016/j.fpsl.2019.100408	https://doi.org/10.1016/j.talanta.2019.120278	https://doi.org/10.1039/D1AN01888D	https://doi.org/10.3390/molecules27072159	https://doi.org/10.1016/j.cej.2023.144442	https://doi.org/10.1016/j.saa.2024.124930
	https://doi.org/10.1039/C9AN01202H	https://doi.org/10.1016/j.microc.2020.105583	https://doi.org/10.1088/1757-899X/1098/6/062054	https://doi.org/10.3390/ma15217653	https://doi.org/10.1038/s41598-023-37126-9	https://doi.org/10.1016/j.snb.2024.135390
	https://doi.org/10.1016/j.microc.2019.03.010	https://doi.org/10.1016/j.measurement.2020.108085	https://doi.org/10.15330/pcss.22.1.73-79	https://doi.org/10.1108/SR-02-2022-0055	https://doi.org/10.1016/j.saa.2023.123009	https://doi.org/10.1016/j.talanta.2023.125537
	https://doi.org/10.1016/j.microc.2019.104176	https://doi.org/10.1016/j.talanta.2019.120211	https://doi.org/10.3390/chemosensors9020040	https://doi.org/10.1039/D1NJ05340J		https://doi.org/10.1002/jssc.202300596
		https://doi.org/10.1016/j.measurement.2019.107068	https://doi.org/10.1016/j.snb.2020.129281	https://doi.org/10.1038/s41598-022-20123-9		https://doi.org/10.1002/adhm.202302173
		https://doi.org/10.1134/S1061934820020136	https://doi.org/10.1021/acsnano.1c01215	https://doi.org/10.1007/s10570-022-04808-y		https://doi.org/10.1016/j.microc.2023.109554
			https://doi.org/10.3390/s21051796	https://doi.org/10.1016/j.microc.2022.107654
			https://doi.org/10.1016/j.talanta.2021.122103	https://doi.org/10.1016/j.microc.2022.107499
			https://doi.org/10.1016/j.snb.2020.129026	https://doi.org/10.1016/j.saa.2021.120554
			https://doi.org/10.1016/j.snb.2021.129915	https://doi.org/10.1016/j.materresbull.2021.111590
				https://doi.org/10.1016/j.microc.2022.107938
				https://doi.org/10.1039/D2NJ03675D
				https://doi.org/10.1111/ijfs.16035
				https://doi.org/10.3390/chemosensors10090348
				https://doi.org/10.1016/j.dyepig.2021.109870
				https://doi.org/10.1039/D1AY02040D
				https://doi.org/10.1016/j.talanta.2022.123244
				https://doi.org/10.1016/j.microc.2021.106952
				https://doi.org/10.1021/acsami.2c09467
				https://doi.org/10.1016/j.snb.2022.132489
				https://doi.org/10.3390/bios12100893
Smartphone Brand
Apple	Samsung	Huawei	Other		Unspecified
https://doi.org/10.1021/acs.inorgchem.8b02564	https://doi.org/10.1016/j.tetlet.2018.03.068	https://doi.org/10.1039/C9AY01235D	https://doi.org/10.1109/JSEN.2018.2843794	LG	https://doi.org/10.1021/acs.analchem.8b03331
https://doi.org/10.1371/journal.pone.0190233	https://doi.org/10.1016/j.chemosphere.2017.10.057	https://doi.org/10.1016/j.microc.2019.104200	https://doi.org/10.1021/acsomega.8b00625	LG	https://doi.org/10.1021/acsami.7b18121
https://doi.org/10.1021/acs.analchem.9b00549	https://doi.org/10.1007/s11696-018-0528-1	https://doi.org/10.1039/C9NJ03954F	https://doi.org/10.1007/s00216-018-0965-2	Xiaomi	https://doi.org/10.1021/acs.jchemed.7b00468
https://doi.org/10.1038/s41598-019-42054-8	https://doi.org/10.1016/j.heliyon.2019.e02995	https://doi.org/10.1016/j.microc.2019.104176	https://doi.org/10.2116/analsci.18P497	ASUS	https://doi.org/10.1021/acsomega.9b01388
https://doi.org/10.1016/j.forc.2019.100167	https://doi.org/10.1016/j.snb.2019.126653	https://doi.org/10.1039/D0NJ05948J	https://doi.org/10.1039/C9AY00720B	Motorola	https://doi.org/10.1007/s00216-019-02172-8
https://doi.org/10.1007/s00216-019-02032-5	https://doi.org/10.1039/C9AY00720B	https://doi.org/10.1016/j.snb.2021.129958	https://doi.org/10.3390/chemosensors7030035	Realme	https://doi.org/10.1016/j.microc.2019.03.010
https://doi.org/10.1039/C9CP00002J	https://doi.org/10.1016/j.fpsl.2018.11.016	https://doi.org/10.3390/s21051796	https://doi.org/10.3390/chemosensors8010010	Xiaomi	https://doi.org/10.1002/adfm.201905493
https://doi.org/10.1039/C9AN01202H	https://doi.org/10.1016/j.forc.2019.100167	https://doi.org/10.1007/s00216-021-03839-x	https://doi.org/10.1016/j.talanta.2019.120211	LG	https://doi.org/10.1021/acs.jafc.0c03352
https://doi.org/10.1016/j.snb.2020.127956	https://doi.org/10.1016/j.fpsl.2019.100408	https://doi.org/10.1039/D1NJ05340J	https://doi.org/10.1016/j.measurement.2019.107068	LG	https://doi.org/10.1002/adom.201901969
https://doi.org/10.1021/acsomega.0c00021	https://doi.org/10.1007/s11356-019-07368-0	https://doi.org/10.1016/j.snb.2022.133109	https://doi.org/10.1080/00032719.2020.1792477	Sony	https://doi.org/10.1016/j.talanta.2019.120278
https://doi.org/10.1016/j.talanta.2020.121271	https://doi.org/10.1590/fst.01220	https://doi.org/10.1007/s11696-024-03600-5	https://doi.org/10.1002/btm2.10176	ASUS	https://doi.org/10.1016/j.cjac.2021.05.002
https://doi.org/10.1021/acssensors.3c02673	https://doi.org/10.15330/pcss.21.4.727-736	https://doi.org/10.1016/j.saa.2024.124238	https://doi.org/10.1016/j.bios.2021.113484	Xiaomi	https://doi.org/10.1002/slct.202100147
https://doi.org/10.1093/nar/gkaa342	https://doi.org/10.1016/j.microc.2019.104283	https://doi.org/10.1039/D2AY02035A	https://doi.org/10.1364/OSAC.417889	Xiaomi	https://doi.org/10.1016/j.molstruc.2020.129249
https://doi.org/10.1039/D0LC00028K	https://doi.org/10.1016/j.saa.2019.117601	https://doi.org/10.1002/bab.1898	https://doi.org/10.1039/D1AN01888D	Oppo, Reader	https://doi.org/10.1088/1757-899X/1098/6/062054
https://doi.org/10.1021/acssensors.0c00937	https://doi.org/10.1016/j.microc.2020.104968	https://doi.org/10.1021/acsnano.1c01215	https://doi.org/10.3390/chemosensors9020040	Xiaomi	https://doi.org/10.1016/j.snb.2020.129026
https://doi.org/10.1016/j.snb.2020.129037	https://doi.org/10.1016/j.microc.2020.105583		https://doi.org/10.1080/10739149.2021.1960370	Xiaomi	https://doi.org/10.1520/GTJ20210026
https://doi.org/10.3390/chemosensors9080235	https://doi.org/10.1134/S1061934820020136		https://doi.org/10.3390/ma15217653	Xiaomi	https://doi.org/10.1007/s10570-022-04808-y
https://doi.org/10.1039/D1AY00719J	https://doi.org/10.1007/s12161-021-02059-4		https://doi.org/10.1108/SR-02-2022-0055	Xiaomi	https://doi.org/10.1016/j.microc.2022.107499
https://doi.org/10.1039/D1AN01888D	https://doi.org/10.1016/j.snb.2020.129037		https://doi.org/10.1038/s41598-022-20123-9	HTC	https://doi.org/10.1016/j.saa.2021.120554
https://doi.org/10.1016/j.talanta.2021.122103	https://doi.org/10.2166/wst.2021.236		https://doi.org/10.1016/j.snb.2022.132489	Lenovo	https://doi.org/10.1016/j.materresbull.2021.111590
https://doi.org/10.1039/D2AN00937D	https://doi.org/10.1016/j.measurement.2020.108877		https://doi.org/10.3390/bios12100893	Xiaomi, Oppo, Xiaomi	https://doi.org/10.3390/chemosensors10090348
https://doi.org/10.1007/s12161-021-02155-5	https://doi.org/10.1016/j.dyepig.2021.109821		https://doi.org/10.1016/j.saa.2022.122096	Motorola	https://doi.org/10.1016/j.dyepig.2021.109870
https://doi.org/10.15330/pcss.23.3.582-589	https://doi.org/10.15330/pcss.22.1.73-79		https://doi.org/10.1016/j.talanta.2023.124686	Xiaomi	https://doi.org/10.1021/acsbiomaterials.4c00431
https://doi.org/10.1111/1556-4029.15042	https://doi.org/10.1016/j.snb.2021.129915		https://doi.org/10.1016/j.microc.2024.109977	Xiaomi	https://doi.org/10.1016/j.talo.2023.100211
https://doi.org/10.3389/fchem.2022.869086	https://doi.org/10.1016/j.foodchem.2022.133063		https://doi.org/10.1039/D2AY02035A	Xiaomi	https://doi.org/10.1016/j.cej.2023.144442
https://doi.org/10.1016/j.cej.2022.138281	https://doi.org/10.1039/D1AY02040D		https://doi.org/10.1038/s41598-023-37126-9	Motorola	https://doi.org/10.1016/j.snb.2024.136173
https://doi.org/10.1016/j.scp.2022.100808	https://doi.org/10.1016/j.talanta.2022.123244		https://doi.org/10.1016/j.saa.2024.124807	Xiaomi	https://doi.org/10.1016/j.snb.2024.135793
https://doi.org/10.3390/molecules27154841	https://doi.org/10.1021/acsami.2c09467		https://doi.org/10.1007/s00216-024-05401-x	Xiaomi	https://doi.org/10.1002/adhm.202302173
https://doi.org/10.1007/s44211-022-00146-y	https://doi.org/10.1016/j.inoche.2022.110252		https://doi.org/10.1016/j.saa.2024.124930	Sony	https://doi.org/10.1016/j.microc.2023.109554
https://doi.org/10.1016/j.jece.2022.107650	https://doi.org/10.1039/D4AY00991F		https://doi.org/10.1002/bab.1898	Xiaomi	https://doi.org/10.1016/j.dyepig.2022.110674
https://doi.org/10.3390/molecules27072159	https://doi.org/10.1016/j.aca.2024.342639		https://doi.org/10.1016/j.measurement.2020.108085	Leco, vivo, Oppo
https://doi.org/10.1016/j.microc.2022.107938	https://doi.org/10.1007/s11696-024-03560-w		https://doi.org/10.1007/s41664-021-00168-x	Realme
https://doi.org/10.1016/j.foodchem.2024.140239	https://doi.org/10.1039/D2AY02035A		https://doi.org/10.1016/j.microc.2024.111068	Vivo, Vivo, Oppo
https://doi.org/10.1039/D2NJ03675D	https://doi.org/10.1016/j.matchemphys.2023.127710
https://doi.org/10.1111/ijfs.16035	https://doi.org/10.1016/j.scp.2023.101175
https://doi.org/10.1016/j.microc.2021.106952	https://doi.org/10.1007/s11696-023-02943-9
https://doi.org/10.1021/acsami.2c09467	https://doi.org/10.1016/j.ijbiomac.2023.126065
https://doi.org/10.1016/j.foodchem.2022.134439	https://doi.org/10.1007/s00604-024-06463-5
https://doi.org/10.1016/j.talanta.2022.124168	https://doi.org/10.1016/j.snb.2024.135390
https://doi.org/10.1016/j.snb.2023.134601	https://doi.org/10.1016/j.talanta.2023.125537
https://doi.org/10.3390/polym15143098	https://doi.org/10.1007/s41664-021-00168-x
https://doi.org/10.1039/D4RA02310B	https://doi.org/10.1021/acs.jchemed.1c01120
https://doi.org/10.1016/j.dyepig.2023.111210
https://doi.org/10.3390/s23073519
https://doi.org/10.1016/j.jhazmat.2023.132510
https://doi.org/10.1016/j.saa.2023.123009
https://doi.org/10.1016/j.snb.2024.136070
https://doi.org/10.1002/jssc.202300596
https://doi.org/10.3390/s18093141
https://doi.org/10.1002/anie.201904416
https://doi.org/10.1002/bab.1898
https://doi.org/10.1007/s41664-021-00168-x
https://doi.org/10.1016/j.snb.2020.129281
https://doi.org/10.1016/j.microc.2022.107654
https://doi.org/10.1021/acs.jchemed.1c01120
https://doi.org/10.1016/j.snb.2022.132122
https://doi.org/10.1021/acssensors.3c02673
https://doi.org/10.1016/j.foodchem.2024.140239
Measurement Modality
Colorimetric			PL
https://doi.org/10.1021/acs.inorgchem.8b02564	https://doi.org/10.1134/S1061934820020136	https://doi.org/10.1016/j.materresbull.2021.111590	https://doi.org/10.3390/bios12100893
https://doi.org/10.1016/j.tetlet.2018.03.068	https://doi.org/10.1007/s12161-021-02059-4	https://doi.org/10.1016/j.microc.2022.107938	https://doi.org/10.1039/C9AY01235D
https://doi.org/10.1016/j.chemosphere.2017.10.057	https://doi.org/10.1007/s41664-021-00168-x	https://doi.org/10.1039/D2NJ03675D	https://doi.org/10.1093/nar/gkaa342
https://doi.org/10.1007/s11696-018-0528-1	https://doi.org/10.1016/j.cjac.2021.05.002	https://doi.org/10.1111/ijfs.16035	https://doi.org/10.1016/j.snb.2024.136070
https://doi.org/10.1371/journal.pone.0190233	https://doi.org/10.1039/D0NJ05948J	https://doi.org/10.3390/chemosensors10090348	https://doi.org/10.1016/j.foodchem.2024.140239
https://doi.org/10.1021/acs.analchem.8b03331	https://doi.org/10.1016/j.snb.2020.129037	https://doi.org/10.1016/j.dyepig.2021.109870	https://doi.org/10.1016/j.snb.2024.136173
https://doi.org/10.1021/acsami.7b18121	https://doi.org/10.1080/00032719.2020.1792477	https://doi.org/10.1039/D1AY02040D	https://doi.org/10.1016/j.foodchem.2022.134439
https://doi.org/10.1109/JSEN.2018.2843794	https://doi.org/10.2166/wst.2021.236	https://doi.org/10.1016/j.talanta.2022.123244	https://doi.org/10.1016/j.snb.2023.134601
https://doi.org/10.1021/acsomega.8b00625	https://doi.org/10.1002/btm2.10176	https://doi.org/10.1016/j.microc.2021.106952
https://doi.org/10.1021/acs.jchemed.7b00468	https://doi.org/10.3390/chemosensors9080235	https://doi.org/10.1021/acsami.2c09467
https://doi.org/10.1007/s00216-018-0965-2	https://doi.org/10.1016/j.bios.2021.113484	https://doi.org/10.1016/j.snb.2022.132489
https://doi.org/10.3390/s18093141	https://doi.org/10.1002/slct.202100147	https://doi.org/10.3390/bios12100893
https://doi.org/10.1016/j.heliyon.2019.e02995	https://doi.org/10.1039/D1AY00719J	https://doi.org/10.1016/j.saa.2022.122096
https://doi.org/10.1016/j.snb.2019.126653	https://doi.org/10.1016/j.measurement.2020.108877	https://doi.org/10.1016/j.foodchem.2022.134439
https://doi.org/10.2116/analsci.18P497	https://doi.org/10.1016/j.dyepig.2021.109821	https://doi.org/10.1016/j.snb.2022.133109
https://doi.org/10.1039/C9AY00720B	https://doi.org/10.1364/OSAC.417889	https://doi.org/10.1016/j.talanta.2022.124168
https://doi.org/10.1021/acsomega.9b01388	https://doi.org/10.1016/j.snb.2021.129958	https://doi.org/10.1016/j.inoche.2022.110252
https://doi.org/10.1016/j.fpsl.2018.11.016	https://doi.org/10.1016/j.molstruc.2020.129249	https://doi.org/10.1016/j.snb.2023.134601
https://doi.org/10.1021/acs.analchem.9b00549	https://doi.org/10.1039/D1AN01888D	https://doi.org/10.3390/polym15143098
https://doi.org/10.1039/C9AY01235D	https://doi.org/10.1088/1757-899X/1098/6/062054	https://doi.org/10.1016/j.talanta.2023.124686
https://doi.org/10.1038/s41598-019-42054-8	https://doi.org/10.15330/pcss.22.1.73-79	https://doi.org/10.1016/j.microc.2024.109977
https://doi.org/10.1016/j.microc.2019.104200	https://doi.org/10.3390/chemosensors9020040	https://doi.org/10.1039/D4AY00991F
https://doi.org/10.1016/j.forc.2019.100167	https://doi.org/10.1016/j.snb.2020.129281	https://doi.org/10.1039/D4RA02310B
https://doi.org/10.1007/s00216-019-02032-5	https://doi.org/10.1021/acsnano.1c01215	https://doi.org/10.1007/s11696-024-03600-5
https://doi.org/10.1002/anie.201904416	https://doi.org/10.3390/s21051796	https://doi.org/10.1016/j.aca.2024.342639
https://doi.org/10.3390/chemosensors7030035	https://doi.org/10.1016/j.talanta.2021.122103	https://doi.org/10.1016/j.microc.2024.111068
https://doi.org/10.1007/s00216-019-02172-8	https://doi.org/10.1016/j.snb.2020.129026	https://doi.org/10.1007/s11696-024-03560-w
https://doi.org/10.1039/C9NJ03954F	https://doi.org/10.1016/j.snb.2021.129915	https://doi.org/10.1016/j.saa.2024.124238
https://doi.org/10.1039/C9CP00002J	https://doi.org/10.1016/j.foodchem.2022.133063	https://doi.org/10.1021/acssensors.3c02673
https://doi.org/10.1016/j.fpsl.2019.100408	https://doi.org/10.1039/D2AN00937D	https://doi.org/10.1021/acsbiomaterials.4c00431
https://doi.org/10.1039/C9AN01202H	https://doi.org/10.1520/GTJ20210026	https://doi.org/10.1016/j.talo.2023.100211
https://doi.org/10.1016/j.microc.2019.03.010	https://doi.org/10.1007/s12161-021-02155-5	https://doi.org/10.1039/D2AY02035A
https://doi.org/10.1016/j.microc.2019.104176	https://doi.org/10.15330/pcss.23.3.582-589	https://doi.org/10.1016/j.dyepig.2023.111210
https://doi.org/10.1002/adfm.201905493	https://doi.org/10.1111/1556-4029.15042	https://doi.org/10.3390/s23073519
https://doi.org/10.1007/s11356-019-07368-0	https://doi.org/10.3389/fchem.2022.869086	https://doi.org/10.1016/j.matchemphys.2023.127710
https://doi.org/10.1590/fst.01220	https://doi.org/10.1080/10739149.2021.1960370	https://doi.org/10.1016/j.scp.2023.101175
https://doi.org/10.1021/acs.jafc.0c03352	https://doi.org/10.1016/j.cej.2022.138281	https://doi.org/10.1007/s11696-023-02943-9
https://doi.org/10.3390/chemosensors8010010	https://doi.org/10.1016/j.scp.2022.100808	https://doi.org/10.1016/j.jhazmat.2023.132510
https://doi.org/10.1016/j.snb.2020.127956	https://doi.org/10.3390/molecules27154841	https://doi.org/10.1016/j.ijbiomac.2023.126065
https://doi.org/10.1002/bab.1898	https://doi.org/10.1021/acs.jchemed.1c01120	https://doi.org/10.1016/j.cej.2023.144442
https://doi.org/10.1021/acsomega.0c00021	https://doi.org/10.1016/j.dyepig.2022.110674	https://doi.org/10.1038/s41598-023-37126-9
https://doi.org/10.15330/pcss.21.4.727-736	https://doi.org/10.1016/j.snb.2022.132122	https://doi.org/10.1016/j.saa.2023.123009
https://doi.org/10.1016/j.microc.2019.104283	https://doi.org/10.1007/s44211-022-00146-y	https://doi.org/10.1016/j.snb.2024.136070
https://doi.org/10.1002/adom.201901969	https://doi.org/10.1016/j.jece.2022.107650	https://doi.org/10.1016/j.snb.2024.136173
https://doi.org/10.1016/j.talanta.2020.121271	https://doi.org/10.1007/s00216-021-03839-x	https://doi.org/10.1016/j.foodchem.2024.140239
https://doi.org/10.1016/j.saa.2019.117601	https://doi.org/10.3390/molecules27072159	https://doi.org/10.1016/j.snb.2024.135793
https://doi.org/10.1093/nar/gkaa342	https://doi.org/10.3390/ma15217653	https://doi.org/10.1016/j.saa.2024.124807
https://doi.org/10.1039/D0LC00028K	https://doi.org/10.1108/SR-02-2022-0055	https://doi.org/10.1007/s00216-024-05401-x
https://doi.org/10.1021/acssensors.0c00937	https://doi.org/10.1039/D1NJ05340J	https://doi.org/10.1007/s00604-024-06463-5
https://doi.org/10.1016/j.microc.2020.104968	https://doi.org/10.1038/s41598-022-20123-9	https://doi.org/10.1016/j.saa.2024.124930
https://doi.org/10.1016/j.talanta.2019.120278	https://doi.org/10.1007/s10570-022-04808-y	https://doi.org/10.1016/j.snb.2024.135390
https://doi.org/10.1016/j.microc.2020.105583	https://doi.org/10.1016/j.microc.2022.107654	https://doi.org/10.1016/j.talanta.2023.125537
https://doi.org/10.1016/j.measurement.2020.108085	https://doi.org/10.1016/j.microc.2022.107499	https://doi.org/10.1002/jssc.202300596
https://doi.org/10.1016/j.talanta.2019.120211	https://doi.org/10.1016/j.saa.2021.120554	https://doi.org/10.1002/adhm.202302173
https://doi.org/10.1016/j.measurement.2019.107068	https://doi.org/10.1016/j.microc.2023.109554
Light Source for PL Measurements
LED-UV
https://doi.org/10.3390/bios12100893
https://doi.org/10.1039/C9AY01235D
https://doi.org/10.1093/nar/gkaa342
https://doi.org/10.1016/j.snb.2024.136070
https://doi.org/10.1016/j.foodchem.2024.140239
https://doi.org/10.1016/j.snb.2024.136173
https://doi.org/10.1016/j.foodchem.2022.134439
https://doi.org/10.1016/j.snb.2023.134601
PL: Contrast Generation
Fluorescent dye
https://doi.org/10.3390/bios12100893
https://doi.org/10.1039/C9AY01235D
https://doi.org/10.1093/nar/gkaa342
https://doi.org/10.1016/j.snb.2024.136070
https://doi.org/10.1016/j.foodchem.2024.140239
https://doi.org/10.1016/j.snb.2024.136173
https://doi.org/10.1016/j.foodchem.2022.134439
https://doi.org/10.1016/j.snb.2023.134601
Colorimetry: Contrast Generation
Dye: stain or label	Chromogen (catalyzed)	Indicator dye	Chromogen
https://doi.org/10.1016/j.chemosphere.2017.10.057	https://doi.org/10.1007/s11696-018-0528-1	https://doi.org/10.1016/j.scp.2022.100808	https://doi.org/10.1021/acs.analchem.8b03331
https://doi.org/10.1021/acsomega.8b00625	https://doi.org/10.3390/chemosensors8010010	https://doi.org/10.1021/acsami.2c09467	https://doi.org/10.1039/C9AY00720B
https://doi.org/10.1016/j.heliyon.2019.e02995	https://doi.org/10.1016/j.snb.2022.132489	https://doi.org/10.3390/bios12100893	https://doi.org/10.1093/nar/gkaa342
https://doi.org/10.1016/j.snb.2019.126653	https://doi.org/10.1007/s00216-024-05401-x	https://doi.org/10.1021/acs.inorgchem.8b02564	https://doi.org/10.1007/s41664-021-00168-x
https://doi.org/10.1007/s11356-019-07368-0	https://doi.org/10.1021/acs.jafc.0c03352	https://doi.org/10.1016/j.tetlet.2018.03.068	https://doi.org/10.1016/j.snb.2020.129037
https://doi.org/10.1016/j.snb.2020.127956	https://doi.org/10.1016/j.talanta.2019.120211	https://doi.org/10.1021/acsami.7b18121	https://doi.org/10.1016/j.foodchem.2022.133063
https://doi.org/10.15330/pcss.21.4.727-736	https://doi.org/10.1002/btm2.10176	https://doi.org/10.1109/JSEN.2018.2843794	https://doi.org/10.1007/s44211-022-00146-y
https://doi.org/10.1007/s12161-021-02059-4	https://doi.org/10.1016/j.snb.2023.134601	https://doi.org/10.1021/acsomega.9b01388	https://doi.org/10.1007/s00216-021-03839-x
https://doi.org/10.2166/wst.2021.236	https://doi.org/10.1021/acsbiomaterials.4c00431	https://doi.org/10.1039/C9AY01235D	https://doi.org/10.1039/D1NJ05340J
https://doi.org/10.3390/chemosensors9080235	https://doi.org/10.1007/s00604-024-06463-5	https://doi.org/10.1038/s41598-019-42054-8	https://doi.org/10.1038/s41598-022-20123-9
https://doi.org/10.1016/j.bios.2021.113484	https://doi.org/10.1016/j.cjac.2021.05.002	https://doi.org/10.1007/s00216-019-02032-5	https://doi.org/10.1016/j.dyepig.2023.111210
https://doi.org/10.1016/j.measurement.2020.108877		https://doi.org/10.1002/anie.201904416	https://doi.org/10.1021/acs.jchemed.7b00468
https://doi.org/10.1088/1757-899X/1098/6/062054		https://doi.org/10.3390/chemosensors7030035	https://doi.org/10.1007/s00216-018-0965-2
https://doi.org/10.15330/pcss.22.1.73-79		https://doi.org/10.1007/s00216-019-02172-8	https://doi.org/10.3390/s18093141
https://doi.org/10.15330/pcss.23.3.582-589		https://doi.org/10.1039/C9CP00002J	https://doi.org/10.2116/analsci.18P497
https://doi.org/10.1080/10739149.2021.1960370		https://doi.org/10.1016/j.fpsl.2019.100408	https://doi.org/10.1016/j.microc.2019.104200
https://doi.org/10.3390/ma15217653		https://doi.org/10.1016/j.microc.2019.03.010	https://doi.org/10.1016/j.forc.2019.100167
https://doi.org/10.1007/s10570-022-04808-y		https://doi.org/10.1016/j.microc.2019.104176	https://doi.org/10.1039/C9NJ03954F
https://doi.org/10.1016/j.microc.2022.107654		https://doi.org/10.1002/adfm.201905493	https://doi.org/10.1039/C9AN01202H
https://doi.org/10.1016/j.microc.2022.107499		https://doi.org/10.1002/bab.1898	https://doi.org/10.1016/j.microc.2020.104968
https://doi.org/10.1016/j.materresbull.2021.111590		https://doi.org/10.1021/acsomega.0c00021	https://doi.org/10.1016/j.microc.2020.105583
https://doi.org/10.1016/j.microc.2022.107938		https://doi.org/10.1016/j.microc.2019.104283	https://doi.org/10.1134/S1061934820020136
https://doi.org/10.3390/chemosensors10090348		https://doi.org/10.1002/adom.201901969	https://doi.org/10.1039/D1AN01888D
https://doi.org/10.1016/j.talanta.2022.123244		https://doi.org/10.1016/j.talanta.2020.121271	https://doi.org/10.1016/j.snb.2021.129915
https://doi.org/10.1016/j.talanta.2022.124168		https://doi.org/10.1016/j.fpsl.2018.11.016	https://doi.org/10.1007/s12161-021-02155-5
https://doi.org/10.1016/j.talanta.2023.124686		https://doi.org/10.1016/j.saa.2019.117601	https://doi.org/10.3389/fchem.2022.869086
https://doi.org/10.3390/s23073519		https://doi.org/10.1021/acssensors.0c00937	https://doi.org/10.1016/j.snb.2022.132122
https://doi.org/10.1016/j.matchemphys.2023.127710		https://doi.org/10.1016/j.talanta.2019.120278	https://doi.org/10.1016/j.saa.2022.122096
https://doi.org/10.1016/j.snb.2024.136173		https://doi.org/10.1016/j.measurement.2020.108085	https://doi.org/10.1016/j.snb.2022.133109
https://doi.org/10.1016/j.talanta.2023.125537		https://doi.org/10.1039/D0NJ05948J	https://doi.org/10.1039/D4RA02310B
https://doi.org/10.1021/acs.analchem.9b00549		https://doi.org/10.1080/00032719.2020.1792477	https://doi.org/10.1007/s11696-024-03600-5
https://doi.org/10.1039/D0LC00028K		https://doi.org/10.1002/slct.202100147	https://doi.org/10.1016/j.saa.2024.124238
https://doi.org/10.1007/s11696-023-02943-9		https://doi.org/10.1039/D1AY00719J	https://doi.org/10.1039/D2AY02035A
https://doi.org/10.1364/OSAC.417889		https://doi.org/10.1016/j.dyepig.2021.109821	https://doi.org/10.1016/j.jhazmat.2023.132510
		https://doi.org/10.1016/j.snb.2021.129958	https://doi.org/10.1038/s41598-023-37126-9
		https://doi.org/10.1016/j.molstruc.2020.129249	https://doi.org/10.1002/jssc.202300596
		https://doi.org/10.3390/chemosensors9020040	https://doi.org/10.1016/j.microc.2023.109554
		https://doi.org/10.1016/j.snb.2020.129281	https://doi.org/10.3390/s21051796
		https://doi.org/10.1021/acsnano.1c01215	https://doi.org/10.1016/j.scp.2023.101175
		https://doi.org/10.1016/j.talanta.2021.122103	https://doi.org/10.1016/j.saa.2023.123009
		https://doi.org/10.1016/j.snb.2020.129026
		https://doi.org/10.1039/D2AN00937D
		https://doi.org/10.1520/GTJ20210026
		https://doi.org/10.1111/1556-4029.15042
		https://doi.org/10.1016/j.cej.2022.138281
		https://doi.org/10.3390/molecules27154841
		https://doi.org/10.1021/acs.jchemed.1c01120
		https://doi.org/10.1016/j.dyepig.2022.110674
		https://doi.org/10.1016/j.jece.2022.107650
		https://doi.org/10.3390/molecules27072159
		https://doi.org/10.1108/SR-02-2022-0055
		https://doi.org/10.1016/j.saa.2021.120554
		https://doi.org/10.1039/D2NJ03675D
		https://doi.org/10.1111/ijfs.16035
		https://doi.org/10.1039/D1AY02040D
		https://doi.org/10.1016/j.foodchem.2022.134439
		https://doi.org/10.1016/j.inoche.2022.110252
		https://doi.org/10.3390/polym15143098
		https://doi.org/10.1016/j.microc.2024.109977
		https://doi.org/10.1039/D4AY00991F
		https://doi.org/10.1016/j.aca.2024.342639
		https://doi.org/10.1016/j.microc.2024.111068
		https://doi.org/10.1007/s11696-024-03560-w
		https://doi.org/10.1021/acssensors.3c02673
		https://doi.org/10.1016/j.talo.2023.100211
		https://doi.org/10.1016/j.ijbiomac.2023.126065
		https://doi.org/10.1016/j.cej.2023.144442
		https://doi.org/10.1016/j.snb.2024.136070
		https://doi.org/10.1016/j.foodchem.2024.140239
		https://doi.org/10.1016/j.saa.2024.124807
		https://doi.org/10.1016/j.saa.2024.124930
		https://doi.org/10.1016/j.snb.2024.135390
		https://doi.org/10.1371/journal.pone.0190233
		https://doi.org/10.1590/fst.01220
		https://doi.org/10.1016/j.measurement.2019.107068
		https://doi.org/10.1016/j.dyepig.2021.109870
		https://doi.org/10.1016/j.microc.2021.106952
		https://doi.org/10.1016/j.snb.2024.135793
Analyte
Small molecule	Cell viability	NA human disease	pH	Ions	Protein	Vapors	Inorganic small molecule
https://doi.org/10.1016/j.chemosphere.2017.10.057	https://doi.org/10.1016/j.cej.2022.138281	https://doi.org/10.1016/j.cjac.2021.05.002	https://doi.org/10.1002/anie.201904416	https://doi.org/10.1021/acs.inorgchem.8b02564	https://doi.org/10.1016/j.snb.2020.127956	https://doi.org/10.3390/s18093141	https://doi.org/10.1038/s41598-019-42054-8
https://doi.org/10.1021/acs.analchem.8b03331	https://doi.org/10.1002/btm2.10176		https://doi.org/10.1002/adfm.201905493	https://doi.org/10.1016/j.tetlet.2018.03.068	https://doi.org/10.1007/s11696-018-0528-1	https://doi.org/10.1039/C9AY00720B	https://doi.org/10.1039/D1AN01888D
https://doi.org/10.1021/acsami.7b18121			https://doi.org/10.1016/j.saa.2019.117601	https://doi.org/10.1007/s00216-018-0965-2	https://doi.org/10.1021/acs.jchemed.7b00468	https://doi.org/10.1021/acs.analchem.9b00549	https://doi.org/10.3390/chemosensors9020040
https://doi.org/10.1109/JSEN.2018.2843794			https://doi.org/10.1016/j.measurement.2020.108085	https://doi.org/10.2116/analsci.18P497	https://doi.org/10.1080/00032719.2020.1792477	https://doi.org/10.1016/j.measurement.2019.107068	https://doi.org/10.1016/j.snb.2020.129281
https://doi.org/10.1016/j.snb.2019.126653			https://doi.org/10.1364/OSAC.417889	https://doi.org/10.1016/j.microc.2019.104200	https://doi.org/10.1016/j.bios.2021.113484	https://doi.org/10.1016/j.snb.2020.129026	https://doi.org/10.1016/j.dyepig.2022.110674
https://doi.org/10.1021/acsomega.9b01388			https://doi.org/10.1520/GTJ20210026	https://doi.org/10.1007/s00216-019-02032-5	https://doi.org/10.1021/acsnano.1c01215	https://doi.org/10.3390/molecules27072159
https://doi.org/10.1039/C9AY01235D			https://doi.org/10.1016/j.saa.2021.120554	https://doi.org/10.3390/chemosensors7030035	https://doi.org/10.3390/s21051796	https://doi.org/10.1016/j.microc.2021.106952
https://doi.org/10.1016/j.forc.2019.100167			https://doi.org/10.1039/D2NJ03675D	https://doi.org/10.1039/C9NJ03954F	https://doi.org/10.1108/SR-02-2022-0055	https://doi.org/10.1007/s11696-023-02943-9
https://doi.org/10.1002/anie.201904416			https://doi.org/10.1021/acssensors.3c02673	https://doi.org/10.1039/C9CP00002J	https://doi.org/10.1007/s10570-022-04808-y	https://doi.org/10.1016/j.jhazmat.2023.132510
https://doi.org/10.1007/s00216-019-02172-8			https://doi.org/10.1002/adhm.202302173	https://doi.org/10.1016/j.microc.2019.03.010	https://doi.org/10.3390/bios12100893	https://doi.org/10.1038/s41598-023-37126-9
https://doi.org/10.1039/C9AN01202H				https://doi.org/10.1016/j.microc.2019.104176	https://doi.org/10.1016/j.snb.2024.136173	https://doi.org/10.1016/j.saa.2024.124807
https://doi.org/10.1007/s11356-019-07368-0				https://doi.org/10.1021/acsomega.0c00021	https://doi.org/10.1007/s00604-024-06463-5
https://doi.org/10.1021/acs.jafc.0c03352				https://doi.org/10.1016/j.microc.2019.104283
https://doi.org/10.3390/chemosensors8010010				https://doi.org/10.1021/acsomega.8b00625
https://doi.org/10.1002/bab.1898				https://doi.org/10.1039/D0LC00028K
https://doi.org/10.1016/j.talanta.2020.121271				https://doi.org/10.1016/j.talanta.2019.120278
https://doi.org/10.1093/nar/gkaa342				https://doi.org/10.1016/j.measurement.2020.108085
https://doi.org/10.1016/j.fpsl.2018.11.016				https://doi.org/10.1134/S1061934820020136
https://doi.org/10.1016/j.fpsl.2019.100408				https://doi.org/10.1007/s41664-021-00168-x
https://doi.org/10.1021/acssensors.0c00937				https://doi.org/10.1039/D0NJ05948J
https://doi.org/10.1016/j.microc.2020.104968				https://doi.org/10.1002/slct.202100147
https://doi.org/10.1016/j.microc.2020.105583				https://doi.org/10.1364/OSAC.417889
https://doi.org/10.1016/j.measurement.2020.108085				https://doi.org/10.1016/j.snb.2021.129958
https://doi.org/10.1016/j.talanta.2019.120211				https://doi.org/10.1016/j.talanta.2021.122103
https://doi.org/10.1007/s12161-021-02059-4				https://doi.org/10.1016/j.snb.2020.129026
https://doi.org/10.1016/j.snb.2020.129037				https://doi.org/10.1039/D2AN00937D
https://doi.org/10.2166/wst.2021.236				https://doi.org/10.1007/s12161-021-02155-5
https://doi.org/10.1039/D1AY00719J				https://doi.org/10.3390/molecules27154841
https://doi.org/10.1016/j.measurement.2020.108877				https://doi.org/10.1021/acs.jchemed.1c01120
https://doi.org/10.1016/j.dyepig.2021.109821				https://doi.org/10.1016/j.jece.2022.107650
https://doi.org/10.1364/OSAC.417889				https://doi.org/10.1039/D1NJ05340J
https://doi.org/10.1016/j.molstruc.2020.129249				https://doi.org/10.1039/D1AY02040D
https://doi.org/10.1088/1757-899X/1098/6/062054				https://doi.org/10.1021/acsami.2c09467
https://doi.org/10.1016/j.snb.2021.129915				https://doi.org/10.1016/j.saa.2022.122096
https://doi.org/10.1016/j.foodchem.2022.133063				https://doi.org/10.1016/j.foodchem.2022.134439
https://doi.org/10.1111/1556-4029.15042				https://doi.org/10.1016/j.snb.2022.133109
https://doi.org/10.3389/fchem.2022.869086				https://doi.org/10.1016/j.inoche.2022.110252
https://doi.org/10.1016/j.scp.2022.100808				https://doi.org/10.1039/D4AY00991F
https://doi.org/10.1016/j.snb.2022.132122				https://doi.org/10.1039/D4RA02310B
https://doi.org/10.1007/s00216-021-03839-x				https://doi.org/10.1016/j.aca.2024.342639
https://doi.org/10.1016/j.microc.2022.107499				https://doi.org/10.1021/acssensors.3c02673
https://doi.org/10.1111/ijfs.16035				https://doi.org/10.1016/j.scp.2023.101175
https://doi.org/10.3390/chemosensors10090348				https://doi.org/10.1016/j.cej.2023.144442
https://doi.org/10.1016/j.dyepig.2021.109870				https://doi.org/10.1016/j.saa.2024.124930
https://doi.org/10.1016/j.talanta.2022.123244				https://doi.org/10.1002/jssc.202300596
https://doi.org/10.1016/j.snb.2022.132489				https://doi.org/10.1016/j.microc.2023.109554
https://doi.org/10.1021/acsomega.8b00625				https://doi.org/10.1016/j.molstruc.2020.129249
https://doi.org/10.1016/j.talanta.2022.124168				https://doi.org/10.1007/s44211-022-00146-y
https://doi.org/10.1016/j.snb.2023.134601
https://doi.org/10.3390/polym15143098
https://doi.org/10.1016/j.talanta.2023.124686
https://doi.org/10.1016/j.microc.2024.109977
https://doi.org/10.1007/s11696-024-03600-5
https://doi.org/10.1016/j.microc.2024.111068
https://doi.org/10.1007/s11696-024-03560-w
https://doi.org/10.1016/j.saa.2024.124238
https://doi.org/10.1021/acssensors.3c02673
https://doi.org/10.1021/acsbiomaterials.4c00431
https://doi.org/10.1016/j.talo.2023.100211
https://doi.org/10.1039/D2AY02035A
https://doi.org/10.1016/j.dyepig.2023.111210
https://doi.org/10.3390/s23073519
https://doi.org/10.1016/j.saa.2023.123009
https://doi.org/10.1016/j.snb.2024.136070
https://doi.org/10.1016/j.foodchem.2024.140239
https://doi.org/10.1016/j.snb.2024.135793
https://doi.org/10.1007/s00216-024-05401-x
https://doi.org/10.1007/s00604-024-06463-5
https://doi.org/10.1016/j.snb.2024.135390
https://doi.org/10.1016/j.talanta.2023.125537
https://doi.org/10.1002/adhm.202302173
https://doi.org/10.3390/ma15217653
https://doi.org/10.1016/j.ijbiomac.2023.126065
Format
Other	Paper	Simple	Multi-well	Microfluidics	Polymer matrix
https://doi.org/10.1038/s41598-019-42054-8	https://doi.org/10.1371/journal.pone.0190233	https://doi.org/10.1021/acs.inorgchem.8b02564	https://doi.org/10.1007/s11696-018-0528-1	https://doi.org/10.3390/s18093141	https://doi.org/10.1016/j.snb.2019.126653 (on polymer)
https://doi.org/10.1016/j.microc.2024.111068	https://doi.org/10.1021/acsami.7b18121	https://doi.org/10.1016/j.tetlet.2018.03.068	https://doi.org/10.2116/analsci.18P497	https://doi.org/10.1016/j.microc.2019.03.010	https://doi.org/10.1016/j.fpsl.2018.11.016
https://doi.org/10.1007/s00216-019-02172-8	https://doi.org/10.1021/acs.jchemed.7b00468	https://doi.org/10.1016/j.chemosphere.2017.10.057	https://doi.org/10.1039/C9AY00720B	https://doi.org/10.1016/j.talanta.2022.124168	https://doi.org/10.1016/j.fpsl.2019.100408
https://doi.org/10.1021/acsomega.0c00021 (TLC)	https://doi.org/10.1007/s00216-018-0965-2	https://doi.org/10.1021/acs.analchem.8b03331	https://doi.org/10.1016/j.microc.2019.104283		https://doi.org/10.1002/adfm.201905493
https://doi.org/10.1002/adom.201901969	https://doi.org/10.1021/acsomega.9b01388	https://doi.org/10.1109/JSEN.2018.2843794	https://doi.org/10.1016/j.forc.2019.100167		https://doi.org/10.1016/j.saa.2019.117601
https://doi.org/10.1016/j.foodchem.2022.133063	https://doi.org/10.1007/s00216-019-02032-5	https://doi.org/10.1021/acsomega.8b00625	https://doi.org/10.1002/bab.1898		https://doi.org/10.1016/j.snb.2021.129958
https://doi.org/10.1016/j.dyepig.2022.110674	https://doi.org/10.1021/acsomega.0c00021	https://doi.org/10.1039/C9AY01235D	https://doi.org/10.1016/j.talanta.2019.120211		https://doi.org/10.1016/j.talanta.2021.122103
https://doi.org/10.1021/acs.analchem.9b00549	https://doi.org/10.1016/j.microc.2019.104283	https://doi.org/10.1016/j.microc.2019.104200	https://doi.org/10.1039/D1AY00719J		https://doi.org/10.3390/molecules27072159
https://doi.org/10.3390/chemosensors10090348	https://doi.org/10.1021/acs.inorgchem.8b02564	https://doi.org/10.3390/chemosensors7030035	https://doi.org/10.3390/s21051796		https://doi.org/10.1111/ijfs.16035
https://doi.org/10.3390/polym15143098	https://doi.org/10.1039/D0LC00028K	https://doi.org/10.1039/C9NJ03954F	https://doi.org/10.1016/j.talo.2023.100211		https://doi.org/10.1021/acsami.2c09467
https://doi.org/10.1016/j.talanta.2023.124686	https://doi.org/10.1021/acssensors.0c00937	https://doi.org/10.1039/C9CP00002J	https://doi.org/10.1016/j.scp.2022.100808		https://doi.org/10.1016/j.snb.2023.134601
https://doi.org/10.1021/acssensors.3c02673	https://doi.org/10.1016/j.talanta.2019.120278	https://doi.org/10.1016/j.microc.2019.104176	https://doi.org/10.3390/molecules27154841		https://doi.org/10.1016/j.ijbiomac.2023.126065
https://doi.org/10.1016/j.saa.2024.124807	https://doi.org/10.1016/j.measurement.2020.108085	https://doi.org/10.1007/s11356-019-07368-0	https://doi.org/10.1021/acs.jchemed.1c01120
	https://doi.org/10.1007/s12161-021-02059-4	https://doi.org/10.1590/fst.01220	https://doi.org/10.1016/j.snb.2024.136173
	https://doi.org/10.1016/j.snb.2020.129037	https://doi.org/10.1021/acs.jafc.0c03352	https://doi.org/10.1007/s00216-024-05401-x
	https://doi.org/10.1002/btm2.10176	https://doi.org/10.3390/chemosensors8010010	https://doi.org/10.1007/s00604-024-06463-5
	https://doi.org/10.1002/slct.202100147	https://doi.org/10.1016/j.snb.2020.127956
	https://doi.org/10.1016/j.measurement.2020.108877	https://doi.org/10.15330/pcss.21.4.727-736
	https://doi.org/10.1039/D1AN01888D	https://doi.org/10.1016/j.talanta.2020.121271
	https://doi.org/10.3390/chemosensors9020040	https://doi.org/10.1093/nar/gkaa342
	https://doi.org/10.1016/j.snb.2021.129915	https://doi.org/10.1016/j.microc.2020.104968
	https://doi.org/10.3389/fchem.2022.869086	https://doi.org/10.1016/j.microc.2020.105583
	https://doi.org/10.1016/j.jece.2022.107650	https://doi.org/10.1016/j.measurement.2019.107068
	https://doi.org/10.1007/s00216-021-03839-x	https://doi.org/10.1134/S1061934820020136
	https://doi.org/10.1108/SR-02-2022-0055	https://doi.org/10.1007/s41664-021-00168-x
	https://doi.org/10.1007/s10570-022-04808-y	https://doi.org/10.1016/j.cjac.2021.05.002
	https://doi.org/10.1016/j.microc.2022.107654	https://doi.org/10.1039/D0NJ05948J
	https://doi.org/10.1016/j.microc.2022.107499	https://doi.org/10.1080/00032719.2020.1792477
	https://doi.org/10.1016/j.bios.2021.113484	https://doi.org/10.2166/wst.2021.236
	https://doi.org/10.1039/D2NJ03675D	https://doi.org/10.3390/chemosensors9080235
	https://doi.org/10.1016/j.snb.2022.132489	https://doi.org/10.1002/slct.202100147
	https://doi.org/10.3390/bios12100893	https://doi.org/10.1016/j.dyepig.2021.109821
	https://doi.org/10.1016/j.snb.2022.132122	https://doi.org/10.1364/OSAC.417889
	https://doi.org/10.1016/j.snb.2022.133109	https://doi.org/10.1016/j.molstruc.2020.129249
	https://doi.org/10.1016/j.snb.2020.129281	https://doi.org/10.1088/1757-899X/1098/6/062054
	https://doi.org/10.1039/D4AY00991F	https://doi.org/10.15330/pcss.22.1.73-79
	https://doi.org/10.1039/D4RA02310B	https://doi.org/10.1007/s11696-024-03600-5
	https://doi.org/10.1007/s12161-021-02155-5	https://doi.org/10.1016/j.snb.2020.129026
	https://doi.org/10.1016/j.aca.2024.342639	https://doi.org/10.1039/D2AN00937D
	https://doi.org/10.1016/j.saa.2021.120554	https://doi.org/10.1520/GTJ20210026
	https://doi.org/10.1016/j.talo.2023.100211	https://doi.org/10.15330/pcss.23.3.582-589
	https://doi.org/10.1016/j.dyepig.2023.111210	https://doi.org/10.1111/1556-4029.15042
	https://doi.org/10.1016/j.cej.2023.144442	https://doi.org/10.1080/10739149.2021.1960370
	https://doi.org/10.1016/j.snb.2024.136070	https://doi.org/10.1007/s44211-022-00146-y
	https://doi.org/10.1016/j.foodchem.2024.140239	https://doi.org/10.3390/ma15217653
	https://doi.org/10.1016/j.saa.2024.124930	https://doi.org/10.1039/D1NJ05340J
	https://doi.org/10.1002/jssc.202300596	https://doi.org/10.1038/s41598-022-20123-9
	https://doi.org/10.1002/adhm.202302173	https://doi.org/10.1016/j.saa.2021.120554
	https://doi.org/10.1039/D1AY02040D	https://doi.org/10.1016/j.materresbull.2021.111590
	https://doi.org/10.1021/acssensors.0c00937	https://doi.org/10.1016/j.microc.2022.107938
	https://doi.org/10.1021/acsnano.1c01215	https://doi.org/10.1016/j.dyepig.2021.109870
	https://doi.org/10.1016/j.foodchem.2022.134439	https://doi.org/10.1016/j.talanta.2022.123244
	https://doi.org/10.1016/j.inoche.2022.110252	https://doi.org/10.1016/j.microc.2021.106952
	https://doi.org/10.1007/s11696-023-02943-9	https://doi.org/10.1016/j.foodchem.2022.134439
		https://doi.org/10.1007/s11696-024-03560-w
		https://doi.org/10.1016/j.saa.2024.124238
		https://doi.org/10.1039/D2AY02035A
		https://doi.org/10.3390/s23073519
		https://doi.org/10.1016/j.matchemphys.2023.127710
		https://doi.org/10.1016/j.scp.2023.101175
		https://doi.org/10.1016/j.jhazmat.2023.132510
		https://doi.org/10.1038/s41598-023-37126-9
		https://doi.org/10.1016/j.saa.2023.123009
		https://doi.org/10.1016/j.snb.2024.135793
		https://doi.org/10.1016/j.snb.2024.135390
		https://doi.org/10.1016/j.talanta.2023.125537
		https://doi.org/10.1016/j.microc.2023.109554
		https://doi.org/10.1016/j.cej.2022.138281
		https://doi.org/10.1016/j.talanta.2019.120278
		https://doi.org/10.1021/acsbiomaterials.4c00431
		https://doi.org/10.1016/j.microc.2024.109977
		https://doi.org/10.1039/C9AN01202H
		https://doi.org/10.1016/j.saa.2022.122096
Color Space for Analysis
RGB	Undefined	Grayscale	HSV/HSL	Other	CIELab
https://doi.org/10.1021/acs.inorgchem.8b02564	https://doi.org/10.1021/acs.analchem.9b00549	https://doi.org/10.1039/D4RA02310B	https://doi.org/10.1002/bab.1898	https://doi.org/10.1016/j.snb.2019.126653	https://doi.org/10.1371/journal.pone.0190233
https://doi.org/10.1016/j.tetlet.2018.03.068	https://doi.org/10.1016/j.microc.2019.104200	https://doi.org/10.1016/j.microc.2022.107499	https://doi.org/10.1016/j.snb.2021.129915	https://doi.org/10.1016/j.measurement.2020.108085	https://doi.org/10.1039/D4RA02310B
https://doi.org/10.1016/j.chemosphere.2017.10.057	https://doi.org/10.3390/chemosensors7030035	https://doi.org/10.1007/s00216-019-02032-5	https://doi.org/10.1016/j.cej.2022.138281	https://doi.org/10.1016/j.snb.2020.129037	https://doi.org/10.1002/bab.1898
https://doi.org/10.1007/s11696-018-0528-1	https://doi.org/10.1039/C9NJ03954F	https://doi.org/10.1021/acssensors.0c00937	https://doi.org/10.1108/SR-02-2022-0055	https://doi.org/10.3390/chemosensors9080235	https://doi.org/10.1021/acsomega.8b00625
https://doi.org/10.1093/nar/gkaa342	https://doi.org/10.3390/chemosensors8010010	https://doi.org/10.1134/S1061934820020136	https://doi.org/10.1016/j.snb.2023.134601	https://doi.org/10.1016/j.microc.2022.107938	https://doi.org/10.15330/pcss.21.4.727-736
https://doi.org/10.1021/acs.analchem.8b03331	https://doi.org/10.1039/D0NJ05948J	https://doi.org/10.1002/btm2.10176	https://doi.org/10.1039/D4RA02310B		https://doi.org/10.1016/j.saa.2019.117601
https://doi.org/10.1021/acsami.7b18121	https://doi.org/10.1016/j.molstruc.2020.129249	https://doi.org/10.3390/chemosensors9080235	https://doi.org/10.1007/s11696-024-03600-5		https://doi.org/10.1039/D1AY00719J
https://doi.org/10.1016/j.scp.2022.100808		https://doi.org/10.1021/acsnano.1c01215	https://doi.org/10.1016/j.aca.2024.342639		https://doi.org/10.3390/chemosensors9020040
https://doi.org/10.1038/s41598-023-37126-9		https://doi.org/10.1016/j.talanta.2021.122103	https://doi.org/10.1038/s41598-023-37126-9		https://doi.org/10.1016/j.foodchem.2022.133063
https://doi.org/10.1021/acs.jchemed.7b00468		https://doi.org/10.1021/acs.jchemed.1c01120	https://doi.org/10.1039/D4RA02310B		https://doi.org/10.3389/fchem.2022.869086
https://doi.org/10.1007/s00216-018-0965-2		https://doi.org/10.1007/s00216-021-03839-x	https://doi.org/10.1109/JSEN.2018.2843794		https://doi.org/10.1016/j.talanta.2023.124686
https://doi.org/10.3390/s18093141		https://doi.org/10.3390/ma15217653	https://doi.org/10.1002/adhm.202302173		https://doi.org/10.1039/D4RA02310B
https://doi.org/10.1016/j.heliyon.2019.e02995		https://doi.org/10.1016/j.microc.2022.107654	https://doi.org/10.1016/j.heliyon.2019.e02995		https://doi.org/10.1016/j.microc.2024.111068
https://doi.org/10.1039/C9AY00720B		https://doi.org/10.1016/j.snb.2022.133109	https://doi.org/10.1016/j.snb.2019.126653		https://doi.org/10.1016/j.dyepig.2023.111210
https://doi.org/10.1021/acsomega.9b01388		https://doi.org/10.1039/D4AY00991F	https://doi.org/10.1021/acsomega.9b01388		https://doi.org/10.1016/j.snb.2024.135793
https://doi.org/10.1016/j.fpsl.2018.11.016		https://doi.org/10.1016/j.jhazmat.2023.132510	https://doi.org/10.1021/acs.jafc.0c03352		https://doi.org/10.1016/j.snb.2024.135390
https://doi.org/10.1039/C9AY01235D		https://doi.org/10.1016/j.snb.2024.136070	https://doi.org/10.15330/pcss.21.4.727-736		https://doi.org/10.1016/j.microc.2023.109554
https://doi.org/10.1038/s41598-019-42054-8		https://doi.org/10.1007/s00604-024-06463-5	https://doi.org/10.1016/j.snb.2020.129037
https://doi.org/10.1016/j.forc.2019.100167			https://doi.org/10.1016/j.measurement.2020.108877
https://doi.org/10.1007/s00216-019-02032-5			https://doi.org/10.1364/OSAC.417889
https://doi.org/10.1002/anie.201904416			https://doi.org/10.3390/chemosensors9020040
https://doi.org/10.1039/C9CP00002J			https://doi.org/10.1520/GTJ20210026
https://doi.org/10.1016/j.fpsl.2019.100408			https://doi.org/10.3389/fchem.2022.869086
https://doi.org/10.1039/C9AN01202H			https://doi.org/10.1016/j.microc.2022.107938
https://doi.org/10.1016/j.microc.2019.03.010			https://doi.org/10.1021/acsami.2c09467
https://doi.org/10.1016/j.microc.2019.104176			https://doi.org/10.1007/s11696-024-03600-5
https://doi.org/10.1002/adfm.201905493			https://doi.org/10.1007/s11696-023-02943-9
https://doi.org/10.1007/s11356-019-07368-0			https://doi.org/10.1038/s41598-023-37126-9
https://doi.org/10.1590/fst.01220
https://doi.org/10.1016/j.snb.2020.127956
https://doi.org/10.1021/acsomega.0c00021
https://doi.org/10.1016/j.microc.2019.104283
https://doi.org/10.1002/adom.201901969
https://doi.org/10.1016/j.talanta.2020.121271
https://doi.org/10.2116/analsci.18P497
https://doi.org/10.1039/D0LC00028K
https://doi.org/10.1021/acssensors.0c00937
https://doi.org/10.1016/j.microc.2020.104968
https://doi.org/10.1016/j.talanta.2019.120278
https://doi.org/10.1016/j.microc.2020.105583
https://doi.org/10.1016/j.talanta.2019.120211
https://doi.org/10.1016/j.measurement.2019.107068
https://doi.org/10.1134/S1061934820020136
https://doi.org/10.1007/s12161-021-02059-4
https://doi.org/10.1007/s41664-021-00168-x
https://doi.org/10.1016/j.cjac.2021.05.002
https://doi.org/10.1016/j.snb.2020.129037
https://doi.org/10.1080/00032719.2020.1792477
https://doi.org/10.2166/wst.2021.236
https://doi.org/10.1002/btm2.10176
https://doi.org/10.1016/j.bios.2021.113484
https://doi.org/10.1002/slct.202100147
https://doi.org/10.1039/D1AY00719J
https://doi.org/10.1016/j.measurement.2020.108877
https://doi.org/10.1016/j.dyepig.2021.109821
https://doi.org/10.1364/OSAC.417889
https://doi.org/10.1016/j.snb.2021.129958
https://doi.org/10.1039/D1AN01888D
https://doi.org/10.1088/1757-899X/1098/6/062054
https://doi.org/10.15330/pcss.22.1.73-79
https://doi.org/10.3390/chemosensors9020040
https://doi.org/10.1016/j.snb.2020.129281
https://doi.org/10.1016/j.snb.2020.129026
https://doi.org/10.3390/s21051796
https://doi.org/10.1039/D2AN00937D
https://doi.org/10.1520/GTJ20210026
https://doi.org/10.1007/s12161-021-02155-5
https://doi.org/10.15330/pcss.23.3.582-589
https://doi.org/10.1111/1556-4029.15042
https://doi.org/10.1080/10739149.2021.1960370
https://doi.org/10.3390/molecules27154841
https://doi.org/10.1016/j.dyepig.2022.110674
https://doi.org/10.1016/j.snb.2022.132122
https://doi.org/10.1007/s44211-022-00146-y
https://doi.org/10.1016/j.jece.2022.107650
https://doi.org/10.1007/s00216-021-03839-x
https://doi.org/10.3390/molecules27072159
https://doi.org/10.3390/ma15217653
https://doi.org/10.1039/D1NJ05340J
https://doi.org/10.1038/s41598-022-20123-9
https://doi.org/10.1007/s10570-022-04808-y
https://doi.org/10.1016/j.microc.2022.107654
https://doi.org/10.1016/j.saa.2021.120554
https://doi.org/10.1016/j.materresbull.2021.111590
https://doi.org/10.1016/j.microc.2022.107938
https://doi.org/10.1039/D4RA02310B
https://doi.org/10.1039/D2NJ03675D
https://doi.org/10.1111/ijfs.16035
https://doi.org/10.3390/chemosensors10090348
https://doi.org/10.1016/j.dyepig.2021.109870
https://doi.org/10.1039/D1AY02040D
https://doi.org/10.1016/j.talanta.2022.123244
https://doi.org/10.1016/j.microc.2021.106952
https://doi.org/10.1021/acsami.2c09467
https://doi.org/10.1016/j.snb.2022.132489
https://doi.org/10.3390/bios12100893
https://doi.org/10.1002/bab.1898
https://doi.org/10.1016/j.saa.2022.122096
https://doi.org/10.1016/j.foodchem.2022.134439
https://doi.org/10.1016/j.snb.2022.133109
https://doi.org/10.1016/j.talanta.2022.124168
https://doi.org/10.1016/j.inoche.2022.110252
https://doi.org/10.3390/polym15143098
https://doi.org/10.1016/j.talanta.2023.124686
https://doi.org/10.1016/j.microc.2024.109977
https://doi.org/10.1039/D4RA02310B
https://doi.org/10.1007/s11696-024-03600-5
https://doi.org/10.1016/j.microc.2024.111068
https://doi.org/10.1016/j.saa.2024.124238
https://doi.org/10.1021/acssensors.3c02673
https://doi.org/10.1021/acsbiomaterials.4c00431
https://doi.org/10.1016/j.talo.2023.100211
https://doi.org/10.1039/D2AY02035A
https://doi.org/10.1016/j.dyepig.2023.111210
https://doi.org/10.3390/s23073519
https://doi.org/10.1016/j.matchemphys.2023.127710
https://doi.org/10.1016/j.scp.2023.101175
https://doi.org/10.1007/s11696-023-02943-9
https://doi.org/10.1016/j.jhazmat.2023.132510
https://doi.org/10.1016/j.ijbiomac.2023.126065
https://doi.org/10.1016/j.cej.2023.144442
https://doi.org/10.1038/s41598-023-37126-9
https://doi.org/10.1016/j.saa.2023.123009
https://doi.org/10.1016/j.snb.2024.136173
https://doi.org/10.1016/j.foodchem.2024.140239
https://doi.org/10.1016/j.snb.2024.135793
https://doi.org/10.1016/j.saa.2024.124807
https://doi.org/10.1007/s00216-024-05401-x
https://doi.org/10.1007/s00604-024-06463-5
https://doi.org/10.1016/j.saa.2024.124930
https://doi.org/10.1016/j.snb.2024.135390
https://doi.org/10.1016/j.talanta.2023.125537
https://doi.org/10.1002/jssc.202300596
https://doi.org/10.1016/j.snb.2021.129915
https://doi.org/10.1007/s00216-019-02172-8
https://doi.org/10.1007/s11696-024-03600-5
https://doi.org/10.1007/s11696-024-03560-w
https://doi.org/10.1002/adhm.202302173
Quantitation method
Analytic calibration			Machine learning			Machine lerning
https://doi.org/10.1021/acs.inorgchem.8b02564	https://doi.org/10.1007/s41664-021-00168-x	https://doi.org/10.1016/j.microc.2021.106952	https://doi.org/10.1016/j.snb.2020.129037
https://doi.org/10.1016/j.tetlet.2018.03.068	https://doi.org/10.1016/j.cjac.2021.05.002	https://doi.org/10.1021/acsami.2c09467	https://doi.org/10.1039/D1AN01888D
https://doi.org/10.1016/j.chemosphere.2017.10.057	https://doi.org/10.1039/D0NJ05948J	https://doi.org/10.1016/j.snb.2022.132489	https://doi.org/10.1021/acsnano.1c01215
https://doi.org/10.1007/s11696-018-0528-1	https://doi.org/10.1080/00032719.2020.1792477	https://doi.org/10.3390/bios12100893	https://doi.org/10.3389/fchem.2022.869086
https://doi.org/10.1371/journal.pone.0190233	https://doi.org/10.2166/wst.2021.236	https://doi.org/10.1016/j.saa.2022.122096	https://doi.org/10.1016/j.cej.2022.138281
https://doi.org/10.1021/acs.analchem.8b03331	https://doi.org/10.1002/btm2.10176	https://doi.org/10.1016/j.foodchem.2022.134439	https://doi.org/10.1016/j.snb.2024.136173
https://doi.org/10.1021/acsami.7b18121	https://doi.org/10.3390/chemosensors9080235	https://doi.org/10.1016/j.snb.2022.133109
https://doi.org/10.1109/JSEN.2018.2843794	https://doi.org/10.1016/j.bios.2021.113484	https://doi.org/10.1016/j.talanta.2022.124168
https://doi.org/10.1021/acsomega.8b00625	https://doi.org/10.1002/slct.202100147	https://doi.org/10.1016/j.inoche.2022.110252
https://doi.org/10.1021/acs.jchemed.7b00468	https://doi.org/10.1039/D1AY00719J	https://doi.org/10.1016/j.snb.2023.134601
https://doi.org/10.1007/s00216-018-0965-2	https://doi.org/10.1016/j.measurement.2020.108877	https://doi.org/10.3390/polym15143098
https://doi.org/10.3390/s18093141	https://doi.org/10.1016/j.dyepig.2021.109821	https://doi.org/10.1016/j.talanta.2023.124686
https://doi.org/10.1016/j.heliyon.2019.e02995	https://doi.org/10.1016/j.snb.2021.129958	https://doi.org/10.1016/j.microc.2024.109977
https://doi.org/10.1016/j.snb.2019.126653	https://doi.org/10.1016/j.molstruc.2020.129249	https://doi.org/10.1039/D4AY00991F
https://doi.org/10.2116/analsci.18P497	https://doi.org/10.1088/1757-899X/1098/6/062054	https://doi.org/10.1039/D4RA02310B
https://doi.org/10.1039/C9AY00720B	https://doi.org/10.15330/pcss.22.1.73-79	https://doi.org/10.1007/s11696-024-03600-5
https://doi.org/10.1021/acsomega.9b01388	https://doi.org/10.3390/chemosensors9020040	https://doi.org/10.1016/j.aca.2024.342639
https://doi.org/10.1016/j.fpsl.2018.11.016	https://doi.org/10.1016/j.snb.2020.129281	https://doi.org/10.1016/j.microc.2024.111068
https://doi.org/10.1021/acs.analchem.9b00549	https://doi.org/10.3390/s21051796	https://doi.org/10.1007/s11696-024-03560-w
https://doi.org/10.1039/C9AY01235D	https://doi.org/10.1016/j.talanta.2021.122103	https://doi.org/10.1016/j.saa.2024.124238
https://doi.org/10.1038/s41598-019-42054-8	https://doi.org/10.1016/j.snb.2020.129026	https://doi.org/10.1021/acssensors.3c02673
https://doi.org/10.1016/j.microc.2019.104200	https://doi.org/10.1016/j.snb.2021.129915	https://doi.org/10.1021/acsbiomaterials.4c00431
https://doi.org/10.1016/j.forc.2019.100167	https://doi.org/10.1016/j.foodchem.2022.133063	https://doi.org/10.1016/j.talo.2023.100211
https://doi.org/10.1007/s00216-019-02032-5	https://doi.org/10.1039/D2AN00937D	https://doi.org/10.1039/D2AY02035A
https://doi.org/10.1002/anie.201904416	https://doi.org/10.1520/GTJ20210026	https://doi.org/10.1016/j.dyepig.2023.111210
https://doi.org/10.3390/chemosensors7030035	https://doi.org/10.1007/s12161-021-02155-5	https://doi.org/10.3390/s23073519
https://doi.org/10.1007/s00216-019-02172-8	https://doi.org/10.15330/pcss.23.3.582-589	https://doi.org/10.1016/j.matchemphys.2023.127710
https://doi.org/10.1039/C9NJ03954F	https://doi.org/10.1111/1556-4029.15042	https://doi.org/10.1016/j.scp.2023.101175
https://doi.org/10.1039/C9CP00002J	https://doi.org/10.1080/10739149.2021.1960370	https://doi.org/10.1007/s11696-023-02943-9
https://doi.org/10.1016/j.fpsl.2019.100408	https://doi.org/10.1016/j.scp.2022.100808	https://doi.org/10.1016/j.jhazmat.2023.132510
https://doi.org/10.1039/C9AN01202H	https://doi.org/10.3390/molecules27154841	https://doi.org/10.1016/j.ijbiomac.2023.126065
https://doi.org/10.1016/j.microc.2019.03.010	https://doi.org/10.1021/acs.jchemed.1c01120	https://doi.org/10.1016/j.cej.2023.144442
https://doi.org/10.1016/j.microc.2019.104176	https://doi.org/10.1016/j.dyepig.2022.110674	https://doi.org/10.1038/s41598-023-37126-9
https://doi.org/10.1002/adfm.201905493	https://doi.org/10.1016/j.snb.2022.132122	https://doi.org/10.1016/j.saa.2023.123009
https://doi.org/10.1007/s11356-019-07368-0	https://doi.org/10.1007/s44211-022-00146-y	https://doi.org/10.1016/j.snb.2024.136070
https://doi.org/10.1590/fst.01220	https://doi.org/10.1016/j.jece.2022.107650	https://doi.org/10.1016/j.foodchem.2024.140239
https://doi.org/10.1021/acs.jafc.0c03352	https://doi.org/10.1007/s00216-021-03839-x	https://doi.org/10.1016/j.snb.2024.135793
https://doi.org/10.3390/chemosensors8010010	https://doi.org/10.3390/molecules27072159	https://doi.org/10.1016/j.saa.2024.124807
https://doi.org/10.1016/j.snb.2020.127956	https://doi.org/10.3390/ma15217653	https://doi.org/10.1007/s00216-024-05401-x
https://doi.org/10.1002/bab.1898	https://doi.org/10.1108/SR-02-2022-0055	https://doi.org/10.1007/s00604-024-06463-5
https://doi.org/10.1021/acsomega.0c00021	https://doi.org/10.1039/D1NJ05340J
https://doi.org/10.15330/pcss.21.4.727-736	https://doi.org/10.1038/s41598-022-20123-9
https://doi.org/10.1016/j.microc.2019.104283	https://doi.org/10.1007/s10570-022-04808-y
https://doi.org/10.1002/adom.201901969	https://doi.org/10.1016/j.microc.2022.107654
https://doi.org/10.1016/j.talanta.2020.121271	https://doi.org/10.1016/j.microc.2022.107499
https://doi.org/10.1016/j.saa.2024.124930	https://doi.org/10.1016/j.saa.2021.120554
https://doi.org/10.1016/j.saa.2019.117601	https://doi.org/10.1016/j.materresbull.2021.111590
https://doi.org/10.1093/nar/gkaa342	https://doi.org/10.1016/j.microc.2022.107938
https://doi.org/10.1039/D0LC00028K	https://doi.org/10.1039/D2NJ03675D
https://doi.org/10.1021/acssensors.0c00937	https://doi.org/10.1111/ijfs.16035
https://doi.org/10.1016/j.microc.2020.104968	https://doi.org/10.3390/chemosensors10090348
https://doi.org/10.1016/j.talanta.2019.120278	https://doi.org/10.1016/j.dyepig.2021.109870
https://doi.org/10.1016/j.microc.2020.105583	https://doi.org/10.1039/D1AY02040D
https://doi.org/10.1016/j.measurement.2020.108085	https://doi.org/10.1016/j.talanta.2022.123244
https://doi.org/10.1016/j.talanta.2019.120211	https://doi.org/10.1016/j.talanta.2023.125537
https://doi.org/10.1016/j.measurement.2019.107068	https://doi.org/10.1002/jssc.202300596
https://doi.org/10.1134/S1061934820020136	https://doi.org/10.1002/adhm.202302173
https://doi.org/10.1007/s12161-021-02059-4	https://doi.org/10.1016/j.microc.2023.109554
https://doi.org/10.1364/OSAC.417889	https://doi.org/10.1016/j.snb.2024.135390
Camera mode
Photograph
https://doi.org/10.1021/acs.inorgchem.8b02564	https://doi.org/10.1016/j.snb.2020.129037	https://doi.org/10.1016/j.talanta.2022.123244
https://doi.org/10.1016/j.tetlet.2018.03.068	https://doi.org/10.1080/00032719.2020.1792477	https://doi.org/10.1016/j.microc.2021.106952
https://doi.org/10.1016/j.chemosphere.2017.10.057	https://doi.org/10.2166/wst.2021.236	https://doi.org/10.1021/acsami.2c09467
https://doi.org/10.1007/s11696-018-0528-1	https://doi.org/10.1002/btm2.10176	https://doi.org/10.1016/j.snb.2022.132489
https://doi.org/10.1371/journal.pone.0190233	https://doi.org/10.3390/chemosensors9080235	https://doi.org/10.3390/bios12100893
https://doi.org/10.1021/acs.analchem.8b03331	https://doi.org/10.1016/j.bios.2021.113484	https://doi.org/10.1016/j.saa.2022.122096
https://doi.org/10.1021/acsami.7b18121	https://doi.org/10.1002/slct.202100147	https://doi.org/10.1016/j.foodchem.2022.134439
https://doi.org/10.1109/JSEN.2018.2843794	https://doi.org/10.1039/D1AY00719J	https://doi.org/10.1016/j.snb.2022.133109
https://doi.org/10.1021/acsomega.8b00625	https://doi.org/10.1016/j.measurement.2020.108877	https://doi.org/10.1016/j.talanta.2022.124168
https://doi.org/10.1021/acs.jchemed.7b00468	https://doi.org/10.1016/j.dyepig.2021.109821	https://doi.org/10.1016/j.inoche.2022.110252
https://doi.org/10.1007/s00216-018-0965-2	https://doi.org/10.1364/OSAC.417889	https://doi.org/10.1016/j.snb.2023.134601
https://doi.org/10.3390/s18093141	https://doi.org/10.1016/j.snb.2021.129958	https://doi.org/10.3390/polym15143098
https://doi.org/10.1016/j.heliyon.2019.e02995	https://doi.org/10.1016/j.molstruc.2020.129249	https://doi.org/10.1016/j.talanta.2023.124686
https://doi.org/10.1016/j.snb.2019.126653	https://doi.org/10.1039/D1AN01888D	https://doi.org/10.1016/j.microc.2024.109977
https://doi.org/10.2116/analsci.18P497	https://doi.org/10.1088/1757-899X/1098/6/062054	https://doi.org/10.1039/D4AY00991F
https://doi.org/10.1039/C9AY00720B	https://doi.org/10.15330/pcss.22.1.73-79	https://doi.org/10.1039/D4RA02310B
https://doi.org/10.1021/acsomega.9b01388	https://doi.org/10.3390/chemosensors9020040	https://doi.org/10.1007/s11696-024-03600-5
https://doi.org/10.1016/j.fpsl.2018.11.016	https://doi.org/10.1016/j.snb.2020.129281	https://doi.org/10.1016/j.aca.2024.342639
https://doi.org/10.1021/acs.analchem.9b00549	https://doi.org/10.1021/acsnano.1c01215	https://doi.org/10.1016/j.microc.2024.111068
https://doi.org/10.1039/C9AY01235D	https://doi.org/10.3390/s21051796	https://doi.org/10.1007/s11696-024-03560-w
https://doi.org/10.1038/s41598-019-42054-8	https://doi.org/10.1016/j.talanta.2021.122103	https://doi.org/10.1016/j.saa.2024.124238
https://doi.org/10.1016/j.microc.2019.104200	https://doi.org/10.1016/j.snb.2020.129026	https://doi.org/10.1021/acssensors.3c02673
https://doi.org/10.1016/j.forc.2019.100167	https://doi.org/10.1016/j.snb.2021.129915	https://doi.org/10.1021/acsbiomaterials.4c00431
https://doi.org/10.1007/s00216-019-02032-5	https://doi.org/10.1016/j.foodchem.2022.133063	https://doi.org/10.1016/j.talo.2023.100211
https://doi.org/10.1002/anie.201904416	https://doi.org/10.1039/D2AN00937D	https://doi.org/10.1039/D2AY02035A
https://doi.org/10.3390/chemosensors7030035	https://doi.org/10.1520/GTJ20210026	https://doi.org/10.1016/j.dyepig.2023.111210
https://doi.org/10.1007/s00216-019-02172-8	https://doi.org/10.1007/s12161-021-02155-5	https://doi.org/10.3390/s23073519
https://doi.org/10.1039/C9NJ03954F	https://doi.org/10.15330/pcss.23.3.582-589	https://doi.org/10.1016/j.matchemphys.2023.127710
https://doi.org/10.1039/C9CP00002J	https://doi.org/10.1111/1556-4029.15042	https://doi.org/10.1016/j.scp.2023.101175
https://doi.org/10.1016/j.fpsl.2019.100408	https://doi.org/10.3389/fchem.2022.869086	https://doi.org/10.1007/s11696-023-02943-9
https://doi.org/10.1039/C9AN01202H	https://doi.org/10.1080/10739149.2021.1960370	https://doi.org/10.1016/j.jhazmat.2023.132510
https://doi.org/10.1016/j.microc.2019.03.010	https://doi.org/10.1016/j.cej.2022.138281	https://doi.org/10.1016/j.ijbiomac.2023.126065
https://doi.org/10.1016/j.microc.2019.104176	https://doi.org/10.1016/j.scp.2022.100808	https://doi.org/10.1016/j.cej.2023.144442
https://doi.org/10.1002/adfm.201905493	https://doi.org/10.3390/molecules27154841	https://doi.org/10.1038/s41598-023-37126-9
https://doi.org/10.1007/s11356-019-07368-0	https://doi.org/10.1021/acs.jchemed.1c01120	https://doi.org/10.1016/j.saa.2023.123009
https://doi.org/10.1590/fst.01220	https://doi.org/10.1016/j.dyepig.2022.110674	https://doi.org/10.1016/j.snb.2024.136070
https://doi.org/10.1021/acs.jafc.0c03352	https://doi.org/10.1016/j.snb.2022.132122	https://doi.org/10.1016/j.snb.2024.136173
https://doi.org/10.3390/chemosensors8010010	https://doi.org/10.1007/s44211-022-00146-y	https://doi.org/10.1016/j.foodchem.2024.140239
https://doi.org/10.1016/j.snb.2020.127956	https://doi.org/10.1016/j.jece.2022.107650	https://doi.org/10.1016/j.snb.2024.135793
https://doi.org/10.1002/bab.1898	https://doi.org/10.1007/s00216-021-03839-x	https://doi.org/10.1016/j.saa.2024.124807
https://doi.org/10.1021/acsomega.0c00021	https://doi.org/10.3390/molecules27072159	https://doi.org/10.1007/s00216-024-05401-x
https://doi.org/10.15330/pcss.21.4.727-736	https://doi.org/10.3390/ma15217653	https://doi.org/10.1007/s00604-024-06463-5
https://doi.org/10.1016/j.microc.2019.104283	https://doi.org/10.1108/SR-02-2022-0055	https://doi.org/10.1016/j.saa.2024.124930
https://doi.org/10.1002/adom.201901969	https://doi.org/10.1039/D1NJ05340J	https://doi.org/10.1016/j.snb.2024.135390
https://doi.org/10.1016/j.talanta.2020.121271	https://doi.org/10.1038/s41598-022-20123-9
https://doi.org/10.1016/j.saa.2019.117601	https://doi.org/10.1007/s10570-022-04808-y
https://doi.org/10.1093/nar/gkaa342	https://doi.org/10.1016/j.microc.2022.107654
https://doi.org/10.1039/D0LC00028K	https://doi.org/10.1016/j.microc.2022.107499
https://doi.org/10.1021/acssensors.0c00937	https://doi.org/10.1016/j.saa.2021.120554
https://doi.org/10.1016/j.microc.2020.104968	https://doi.org/10.1016/j.materresbull.2021.111590
https://doi.org/10.1016/j.talanta.2019.120278	https://doi.org/10.1016/j.microc.2022.107938
https://doi.org/10.1016/j.microc.2020.105583	https://doi.org/10.1039/D2NJ03675D
https://doi.org/10.1016/j.measurement.2020.108085	https://doi.org/10.1111/ijfs.16035
https://doi.org/10.1016/j.talanta.2019.120211	https://doi.org/10.3390/chemosensors10090348
https://doi.org/10.1016/j.measurement.2019.107068	https://doi.org/10.1016/j.dyepig.2021.109870
https://doi.org/10.1134/S1061934820020136	https://doi.org/10.1039/D1AY02040D
https://doi.org/10.1007/s12161-021-02059-4	https://doi.org/10.1016/j.talanta.2023.125537
https://doi.org/10.1007/s41664-021-00168-x	https://doi.org/10.1002/jssc.202300596
https://doi.org/10.1016/j.cjac.2021.05.002	https://doi.org/10.1002/adhm.202302173
https://doi.org/10.1039/D0NJ05948J	https://doi.org/10.1016/j.microc.2023.109554
Technology readiness
Aunthentic sample, mix of lab and portable methods	Proof of concept	Aunthentic sample to answer
https://doi.org/10.1021/acs.inorgchem.8b02564	https://doi.org/10.1016/j.tetlet.2018.03.068	https://doi.org/10.1371/journal.pone.0190233
https://doi.org/10.1016/j.chemosphere.2017.10.057	https://doi.org/10.1007/s11696-018-0528-1	https://doi.org/10.1016/j.fpsl.2018.11.016
https://doi.org/10.1021/acs.analchem.8b03331	https://doi.org/10.1021/acsami.7b18121	https://doi.org/10.1002/anie.201904416
https://doi.org/10.1109/JSEN.2018.2843794	https://doi.org/10.1021/acsomega.8b00625	https://doi.org/10.1016/j.fpsl.2019.100408
https://doi.org/10.1007/s00216-018-0965-2	https://doi.org/10.1021/acs.jchemed.7b00468	https://doi.org/10.1002/adom.201901969
https://doi.org/10.2116/analsci.18P497	https://doi.org/10.1038/s41598-019-42054-8	https://doi.org/10.1016/j.saa.2019.117601
https://doi.org/10.1039/C9AY00720B	https://doi.org/10.1016/j.heliyon.2019.e02995	https://doi.org/10.1002/slct.202100147
https://doi.org/10.1021/acsomega.9b01388	https://doi.org/10.1016/j.snb.2019.126653	https://doi.org/10.1021/acsnano.1c01215
https://doi.org/10.1039/C9AY01235D	https://doi.org/10.1021/acs.analchem.9b00549	https://doi.org/10.1108/SR-02-2022-0055
https://doi.org/10.1016/j.microc.2019.104200	https://doi.org/10.1016/j.snb.2023.134601	https://doi.org/10.1007/s10570-022-04808-y
https://doi.org/10.1016/j.forc.2019.100167	https://doi.org/10.3390/chemosensors7030035	https://doi.org/10.1007/s00216-019-02172-8
https://doi.org/10.1039/D4AY00991F	https://doi.org/10.1002/adfm.201905493	https://doi.org/10.1016/j.snb.2022.132489
https://doi.org/10.1039/C9NJ03954F	https://doi.org/10.1007/s11356-019-07368-0	https://doi.org/10.1016/j.measurement.2020.108085
https://doi.org/10.1039/C9CP00002J	https://doi.org/10.1016/j.snb.2020.127956	https://doi.org/10.3390/polym15143098
https://doi.org/10.1039/C9AN01202H	https://doi.org/10.1016/j.talanta.2020.121271	https://doi.org/10.1016/j.microc.2024.111068
https://doi.org/10.1016/j.microc.2019.03.010	https://doi.org/10.15330/pcss.21.4.727-736	https://doi.org/10.1021/acssensors.3c02673
https://doi.org/10.1016/j.microc.2019.104176	https://doi.org/10.1093/nar/gkaa342	https://doi.org/10.1016/j.ijbiomac.2023.126065
https://doi.org/10.1590/fst.01220	https://doi.org/10.1039/D0LC00028K	https://doi.org/10.1016/j.foodchem.2024.140239
https://doi.org/10.3390/chemosensors8010010	https://doi.org/10.1016/j.talanta.2019.120211	https://doi.org/10.1002/adhm.202302173
https://doi.org/10.1002/bab.1898	https://doi.org/10.1134/S1061934820020136	https://doi.org/10.3390/s18093141
https://doi.org/10.1016/j.microc.2019.104283	https://doi.org/10.1016/j.snb.2020.129037	https://doi.org/10.1007/s00216-019-02032-5
https://doi.org/10.1016/j.cjac.2021.05.002	https://doi.org/10.2166/wst.2021.236	https://doi.org/10.1016/j.microc.2020.104968
https://doi.org/10.1021/acsami.2c09467	https://doi.org/10.3390/chemosensors9080235	https://doi.org/10.1016/j.measurement.2019.107068
https://doi.org/10.1021/acssensors.0c00937	https://doi.org/10.1016/j.snb.2021.129958	https://doi.org/10.1002/btm2.10176
https://doi.org/10.1016/j.bios.2021.113484	https://doi.org/10.1016/j.measurement.2020.108877	https://doi.org/10.1016/j.jece.2022.107650
https://doi.org/10.1016/j.microc.2020.105583	https://doi.org/10.1016/j.dyepig.2021.109821	https://doi.org/10.1016/j.dyepig.2023.111210
https://doi.org/10.1364/OSAC.417889	https://doi.org/10.1016/j.molstruc.2020.129249	https://doi.org/10.1007/s11696-023-02943-9
https://doi.org/10.1007/s12161-021-02059-4	https://doi.org/10.1088/1757-899X/1098/6/062054	https://doi.org/10.1016/j.aca.2024.342639
https://doi.org/10.1007/s41664-021-00168-x	https://doi.org/10.15330/pcss.22.1.73-79	https://doi.org/10.1016/j.snb.2024.136070
https://doi.org/10.1039/D0NJ05948J	https://doi.org/10.3390/chemosensors9020040	https://doi.org/10.1016/j.saa.2024.124930
https://doi.org/10.1080/00032719.2020.1792477	https://doi.org/10.1016/j.snb.2020.129281	https://doi.org/10.1002/jssc.202300596
https://doi.org/10.3390/ma15217653	https://doi.org/10.1016/j.snb.2021.129915
https://doi.org/10.1039/D1AY00719J	https://doi.org/10.15330/pcss.23.3.582-589
https://doi.org/10.3390/s21051796	https://doi.org/10.1080/10739149.2021.1960370
https://doi.org/10.1039/D1AN01888D	https://doi.org/10.1021/acs.jchemed.1c01120
https://doi.org/10.1016/j.talanta.2021.122103	https://doi.org/10.1016/j.dyepig.2022.110674
https://doi.org/10.1016/j.snb.2020.129026	https://doi.org/10.1016/j.snb.2024.135390
https://doi.org/10.1016/j.foodchem.2022.133063	https://doi.org/10.1038/s41598-022-20123-9
https://doi.org/10.1039/D2AN00937D	https://doi.org/10.1016/j.microc.2022.107654
https://doi.org/10.1520/GTJ20210026	https://doi.org/10.1016/j.saa.2021.120554
https://doi.org/10.1007/s12161-021-02155-5	https://doi.org/10.1016/j.materresbull.2021.111590
https://doi.org/10.1111/1556-4029.15042	https://doi.org/10.1016/j.talanta.2022.123244
https://doi.org/10.3389/fchem.2022.869086	https://doi.org/10.1016/j.matchemphys.2023.127710
https://doi.org/10.1016/j.cej.2022.138281	https://doi.org/10.1016/j.microc.2024.109977
https://doi.org/10.1016/j.scp.2022.100808	https://doi.org/10.1016/j.jhazmat.2023.132510
https://doi.org/10.3390/molecules27154841	https://doi.org/10.1038/s41598-023-37126-9
https://doi.org/10.1007/s44211-022-00146-y	https://doi.org/10.1016/j.snb.2024.136173
https://doi.org/10.1039/D1AY02040D	https://doi.org/10.1016/j.snb.2024.135793
https://doi.org/10.1007/s00216-021-03839-x	https://doi.org/10.1016/j.saa.2024.124807
https://doi.org/10.3390/molecules27072159	https://doi.org/10.1039/D4RA02310B
https://doi.org/10.1039/D1NJ05340J
https://doi.org/10.1016/j.microc.2022.107938
https://doi.org/10.1039/D2NJ03675D
https://doi.org/10.1111/ijfs.16035
https://doi.org/10.3390/chemosensors10090348
https://doi.org/10.1016/j.dyepig.2021.109870
https://doi.org/10.1016/j.microc.2021.106952
https://doi.org/10.3390/bios12100893
https://doi.org/10.1016/j.snb.2022.132122
https://doi.org/10.1016/j.saa.2022.122096
https://doi.org/10.1016/j.foodchem.2022.134439
https://doi.org/10.1016/j.snb.2022.133109
https://doi.org/10.1016/j.inoche.2022.110252
https://doi.org/10.1016/j.talanta.2023.124686
https://doi.org/10.1007/s11696-024-03600-5
https://doi.org/10.1007/s11696-024-03560-w
https://doi.org/10.1016/j.saa.2024.124238
https://doi.org/10.1021/acsbiomaterials.4c00431
https://doi.org/10.1039/D2AY02035A
https://doi.org/10.3390/s23073519
https://doi.org/10.1016/j.cej.2023.144442
https://doi.org/10.1016/j.saa.2023.123009
https://doi.org/10.1007/s00216-024-05401-x
https://doi.org/10.1007/s00604-024-06463-5
https://doi.org/10.1016/j.talanta.2023.125537
https://doi.org/10.1016/j.microc.2023.109554
https://doi.org/10.1021/acs.jafc.0c03352
https://doi.org/10.1021/acsomega.0c00021
https://doi.org/10.1016/j.talanta.2019.120278
https://doi.org/10.1016/j.microc.2022.107499
https://doi.org/10.1016/j.talanta.2022.124168
https://doi.org/10.1016/j.scp.2023.101175
https://doi.org/10.1016/j.talo.2023.100211

## Sheet: Noble NPs.
Year
2018	2019	2020	2021	2022	2023	2024
https://doi.org/10.1016/j.talanta.2017.08.022	https://doi.org/10.1016/j.snb.2019.126942	https://doi.org/10.1126/sciadv.aaz7445	https://doi.org/10.1016/j.bios.2021.113187	https://doi.org/10.1016/j.bios.2021.113646	https://doi.org/10.1016/j.foodchem.2022.134768	https://doi.org/10.1039/D4RA03665D
	https://doi.org/10.1021/acs.analchem.9b00255	https://doi.org/10.1016/j.talanta.2020.121388	https://doi.org/10.1016/j.snb.2021.129708	https://doi.org/10.1007/s00216-022-03880-4	https://doi.org/10.1016/j.foodchem.2022.134560	https://doi.org/10.1007/s00216-024-05378-7
	https://doi.org/10.1021/acs.analchem.9b00339	https://doi.org/10.1016/j.jhazmat.2020.122506	https://doi.org/10.1016/j.foodchem.2021.129578	https://doi.org/10.1021/acsami.2c15407		https://doi.org/10.1016/j.jhazmat.2024.134967
	https://doi.org/10.1016/j.sna.2019.06.038	https://doi.org/10.1007/s00604-020-04410-8	https://doi.org/10.1007/s00604-021-05032-4	https://doi.org/10.1021/acssensors.1c02585
	https://doi.org/10.1038/s41477-019-0476-y		https://doi.org/10.1039/D1AN00621E
			https://doi.org/10.1021/acs.analchem.1c04139
			https://doi.org/10.1039/D0TC05990K
Smartphone Brand
Apple	Samsung	Huawei	Other		Unspecified	Xiaomi
https://doi.org/10.1016/j.talanta.2017.08.022	https://doi.org/10.1016/j.snb.2019.126942	https://doi.org/10.1016/j.snb.2021.129708	https://doi.org/10.1038/s41477-019-0476-y	LG	https://doi.org/10.1021/acs.analchem.9b00339	https://doi.org/10.1016/j.bios.2021.113646
https://doi.org/10.1021/acs.analchem.9b00255	https://doi.org/10.1016/j.bios.2021.113187	https://doi.org/10.1016/j.bios.2021.113646	https://doi.org/10.1126/sciadv.aaz7445	Lenovo	https://pubs.acs.org/doi/abs/10.1021/acsami.1c13273
https://doi.org/10.1016/j.sna.2019.06.038	https://doi.org/10.1021/acsami.2c15407		https://doi.org/10.1016/j.jhazmat.2020.122506	Oppo	https://doi.org/10.1039/D1AN00621E
https://doi.org/10.1016/j.talanta.2020.121388	https://doi.org/10.1021/acssensors.1c02585		https://doi.org/10.1016/j.foodchem.2021.129578	Vivo	https://doi.org/10.1021/acs.analchem.1c04139
https://doi.org/10.1007/s00604-020-04410-8	https://doi.org/10.1016/j.foodchem.2022.134560		https://doi.org/10.1007/s00604-021-05032-4	LG	https://doi.org/10.1016/j.foodchem.2022.134768
https://doi.org/10.1007/s00216-022-03880-4			https://doi.org/10.1039/D0TC05990K	Vivo	https://doi.org/10.1039/D4RA03665D
https://doi.org/10.1016/j.foodchem.2022.134560					https://doi.org/10.1007/s00216-024-05378-7
https://doi.org/10.1016/j.foodchem.2022.134560					https://doi.org/10.1016/j.jhazmat.2024.134967
Measurement Modality
Colorimetric	PL
https://doi.org/10.1016/j.talanta.2017.08.022	https://doi.org/10.1016/j.jhazmat.2020.122506
https://doi.org/10.1016/j.snb.2019.126942	https://pubs.acs.org/doi/abs/10.1021/acsami.1c13273
https://doi.org/10.1021/acs.analchem.9b00255	https://doi.org/10.1016/j.jhazmat.2024.134967
https://doi.org/10.1021/acs.analchem.9b00339
https://doi.org/10.1016/j.sna.2019.06.038
https://doi.org/10.1038/s41477-019-0476-y
https://doi.org/10.1126/sciadv.aaz7445
https://doi.org/10.1016/j.talanta.2020.121388
https://doi.org/10.1016/j.jhazmat.2020.122506
https://doi.org/10.1007/s00604-020-04410-8
https://doi.org/10.1016/j.bios.2021.113187
https://doi.org/10.1016/j.snb.2021.129708
https://doi.org/10.1016/j.foodchem.2021.129578
https://pubs.acs.org/doi/abs/10.1021/acsami.1c13273
https://doi.org/10.1007/s00604-021-05032-4
https://doi.org/10.1039/D1AN00621E
https://doi.org/10.1021/acs.analchem.1c04139
https://doi.org/10.1039/D0TC05990K
https://doi.org/10.1016/j.bios.2021.113646
https://doi.org/10.1007/s00216-022-03880-4
https://doi.org/10.1021/acsami.2c15407
https://doi.org/10.1021/acssensors.1c02585
https://doi.org/10.1016/j.foodchem.2022.134768
https://doi.org/10.1016/j.foodchem.2022.134560
https://doi.org/10.1039/D4RA03665D
https://doi.org/10.1007/s00216-024-05378-7
Light Source for PL Measurements
UV Lamp
https://doi.org/10.1016/j.jhazmat.2020.122506
https://pubs.acs.org/doi/abs/10.1021/acsami.1c13273
https://doi.org/10.1016/j.jhazmat.2024.134967
PL: Contrast Generation
QD	Other
https://pubs.acs.org/doi/abs/10.1021/acsami.1c13273	https://doi.org/10.1016/j.jhazmat.2020.122506
	https://doi.org/10.1016/j.jhazmat.2024.134967
Colorimetry: Contrast Generation
AuNP	Other
https://doi.org/10.1016/j.snb.2019.126942	https://doi.org/10.1016/j.talanta.2017.08.022
https://doi.org/10.1021/acs.analchem.9b00339	https://doi.org/10.1021/acs.analchem.9b00255
https://doi.org/10.1016/j.sna.2019.06.038	https://doi.org/10.1039/D4RA03665D
https://doi.org/10.1038/s41477-019-0476-y	https://doi.org/10.1016/j.bios.2021.113187
https://doi.org/10.1126/sciadv.aaz7445
https://doi.org/10.1016/j.talanta.2020.121388
https://doi.org/10.1016/j.jhazmat.2020.122506
https://doi.org/10.1007/s00604-020-04410-8
https://doi.org/10.1016/j.snb.2021.129708
https://doi.org/10.1016/j.foodchem.2021.129578
https://pubs.acs.org/doi/abs/10.1021/acsami.1c13273
https://doi.org/10.1007/s00604-021-05032-4
https://doi.org/10.1039/D1AN00621E
https://doi.org/10.1021/acs.analchem.1c04139
https://doi.org/10.1039/D0TC05990K
https://doi.org/10.1016/j.bios.2021.113646
https://doi.org/10.1021/acsami.2c15407
https://doi.org/10.1021/acssensors.1c02585
https://doi.org/10.1016/j.foodchem.2022.134768
Analyte
Small molecule	Bacteria sp.	NA other	Protein	Ions	NA virus	Virus	Other	Vapors	Inorganic small molecule
https://doi.org/10.1007/s00604-020-04410-8	https://doi.org/10.1016/j.foodchem.2021.129578	https://doi.org/10.1126/sciadv.aaz7445	https://doi.org/10.1021/acs.analchem.1c04139	https://doi.org/10.1016/j.snb.2019.126942	https://doi.org/10.1016/j.bios.2021.113646	https://doi.org/10.1021/acsami.2c15407	https://doi.org/10.1016/j.sna.2019.06.038	https://doi.org/10.1016/j.talanta.2017.08.022	https://doi.org/10.1021/acs.analchem.9b00255
https://doi.org/10.1016/j.bios.2021.113187				https://doi.org/10.1021/acs.analchem.9b00339	https://doi.org/10.1007/s00216-022-03880-4		https://doi.org/10.1021/acssensors.1c02585	https://doi.org/10.1038/s41477-019-0476-y
https://pubs.acs.org/doi/abs/10.1021/acsami.1c13273				https://doi.org/10.1016/j.jhazmat.2020.122506				https://doi.org/10.1016/j.talanta.2020.121388
https://doi.org/10.1039/D1AN00621E				https://doi.org/10.1007/s00604-021-05032-4				https://doi.org/10.1016/j.snb.2021.129708
https://doi.org/10.1016/j.foodchem.2022.134768				https://doi.org/10.1039/D0TC05990K
https://doi.org/10.1016/j.foodchem.2022.134560				https://doi.org/10.1039/D4RA03665D
https://doi.org/10.1007/s00216-024-05378-7				https://doi.org/10.1016/j.jhazmat.2024.134967
Format
Lateral flow	Paper	Simple	Multi-well	Microfluidics	Polymer matrix
https://doi.org/10.1007/s00216-022-03880-4	https://doi.org/10.1021/acs.analchem.9b00339	https://doi.org/10.1016/j.talanta.2017.08.022	https://doi.org/10.1016/j.foodchem.2022.134768	https://doi.org/10.1126/sciadv.aaz7445	https://doi.org/10.1016/j.sna.2019.06.038
	https://doi.org/10.1038/s41477-019-0476-y	https://doi.org/10.1016/j.snb.2019.126942	https://doi.org/10.1039/D4RA03665D	https://doi.org/10.1016/j.foodchem.2021.129578	https://doi.org/10.1016/j.snb.2021.129708
	https://doi.org/10.1016/j.jhazmat.2020.122506	https://doi.org/10.1021/acs.analchem.9b00255	https://doi.org/10.1007/s00216-024-05378-7		https://doi.org/10.1007/s00604-021-05032-4
	https://doi.org/10.1016/j.bios.2021.113187	https://doi.org/10.1016/j.talanta.2020.121388
	https://pubs.acs.org/doi/abs/10.1021/acsami.1c13273	https://doi.org/10.1007/s00604-020-04410-8
	https://doi.org/10.1016/j.foodchem.2022.134560	https://doi.org/10.1039/D1AN00621E
	https://doi.org/10.1016/j.jhazmat.2024.134967	https://doi.org/10.1021/acs.analchem.1c04139
		https://doi.org/10.1039/D0TC05990K
		https://doi.org/10.1016/j.bios.2021.113646
		https://doi.org/10.1021/acsami.2c15407
		https://doi.org/10.1021/acssensors.1c02585
Color Space for analysis
RGB	Undefined	Grayscale	HSV/HSL	Other
https://doi.org/10.1016/j.talanta.2017.08.022	https://doi.org/10.1007/s00216-022-03880-4	https://doi.org/10.1126/sciadv.aaz7445	https://doi.org/10.1016/j.foodchem.2021.129578	https://doi.org/10.1016/j.jhazmat.2024.134967
https://doi.org/10.1016/j.snb.2019.126942		https://doi.org/10.1007/s00604-020-04410-8
https://doi.org/10.1021/acs.analchem.9b00255		https://doi.org/10.1016/j.bios.2021.113187
https://doi.org/10.1021/acs.analchem.9b00339		https://doi.org/10.1007/s00604-021-05032-4
https://doi.org/10.1016/j.sna.2019.06.038		https://doi.org/10.1021/acs.analchem.1c04139
https://doi.org/10.1038/s41477-019-0476-y		https://doi.org/10.1007/s00216-024-05378-7
https://doi.org/10.1016/j.talanta.2020.121388
https://doi.org/10.1016/j.jhazmat.2020.122506
https://doi.org/10.1016/j.snb.2021.129708
https://pubs.acs.org/doi/abs/10.1021/acsami.1c13273
https://doi.org/10.1039/D1AN00621E
https://doi.org/10.1039/D0TC05990K
https://doi.org/10.1016/j.bios.2021.113646
https://doi.org/10.1021/acsami.2c15407
https://doi.org/10.1021/acssensors.1c02585
https://doi.org/10.1016/j.foodchem.2022.134768
https://doi.org/10.1016/j.foodchem.2022.134560
https://doi.org/10.1039/D4RA03665D
Quantitation method
Analytic calibration	Machine learning
https://doi.org/10.1016/j.talanta.2017.08.022	https://doi.org/10.1016/j.snb.2019.126942
https://doi.org/10.1021/acs.analchem.9b00255	https://doi.org/10.1038/s41477-019-0476-y
https://doi.org/10.1021/acs.analchem.9b00339	https://doi.org/10.1039/D0TC05990K
https://doi.org/10.1016/j.sna.2019.06.038	https://doi.org/10.1021/acsami.2c15407
https://doi.org/10.1126/sciadv.aaz7445	https://doi.org/10.1016/j.foodchem.2022.134768
https://doi.org/10.1016/j.talanta.2020.121388
https://doi.org/10.1016/j.jhazmat.2020.122506
https://doi.org/10.1007/s00604-020-04410-8
https://doi.org/10.1016/j.bios.2021.113187
https://doi.org/10.1016/j.snb.2021.129708
https://doi.org/10.1016/j.foodchem.2021.129578
https://pubs.acs.org/doi/abs/10.1021/acsami.1c13273
https://doi.org/10.1007/s00604-021-05032-4
https://doi.org/10.1039/D1AN00621E
https://doi.org/10.1021/acs.analchem.1c04139
https://doi.org/10.1016/j.bios.2021.113646
https://doi.org/10.1007/s00216-022-03880-4
https://doi.org/10.1021/acssensors.1c02585
https://doi.org/10.1016/j.foodchem.2022.134560
https://doi.org/10.1039/D4RA03665D
https://doi.org/10.1007/s00216-024-05378-7
https://doi.org/10.1016/j.jhazmat.2024.134967
Camera mode
Photograph
https://doi.org/10.1016/j.talanta.2017.08.022
https://doi.org/10.1016/j.snb.2019.126942
https://doi.org/10.1021/acs.analchem.9b00255
https://doi.org/10.1021/acs.analchem.9b00339
https://doi.org/10.1016/j.sna.2019.06.038
https://doi.org/10.1038/s41477-019-0476-y
https://doi.org/10.1126/sciadv.aaz7445
https://doi.org/10.1016/j.talanta.2020.121388
https://doi.org/10.1016/j.jhazmat.2020.122506
https://doi.org/10.1007/s00604-020-04410-8
https://doi.org/10.1016/j.bios.2021.113187
https://doi.org/10.1016/j.snb.2021.129708
https://doi.org/10.1016/j.foodchem.2021.129578
https://pubs.acs.org/doi/abs/10.1021/acsami.1c13273
https://doi.org/10.1007/s00604-021-05032-4
https://doi.org/10.1039/D1AN00621E
https://doi.org/10.1021/acs.analchem.1c04139
https://doi.org/10.1039/D0TC05990K
https://doi.org/10.1016/j.bios.2021.113646
https://doi.org/10.1007/s00216-022-03880-4
https://doi.org/10.1021/acsami.2c15407
https://doi.org/10.1021/acssensors.1c02585
https://doi.org/10.1016/j.foodchem.2022.134768
https://doi.org/10.1016/j.foodchem.2022.134560
https://doi.org/10.1039/D4RA03665D
https://doi.org/10.1007/s00216-024-05378-7
https://doi.org/10.1016/j.jhazmat.2024.134967
Biorecognition Element
Oligonucleotide	Aptamer	Antibody
https://doi.org/10.1016/j.snb.2019.126942	https://doi.org/10.1016/j.foodchem.2021.129578	https://doi.org/10.1021/acsami.2c15407
https://doi.org/10.1126/sciadv.aaz7445	https://doi.org/10.1021/acs.analchem.1c04139
https://doi.org/10.1016/j.bios.2021.113646
https://doi.org/10.1007/s00216-022-03880-4
Nucleic Acid Amplification Method
RPA	PCR+CRISPR/Cas	LAMP
https://doi.org/10.1126/sciadv.aaz7445	https://doi.org/10.1016/j.bios.2021.113646	https://doi.org/10.1007/s00216-022-03880-4
Technology readiness
Aunthentic sample, mix of lab and portable methods	Proof of concept	Authentic sample to answer
https://doi.org/10.1016/j.talanta.2017.08.022	https://doi.org/10.1016/j.sna.2019.06.038	https://doi.org/10.1038/s41477-019-0476-y
https://doi.org/10.1016/j.snb.2019.126942	https://doi.org/10.1016/j.bios.2021.113187	https://doi.org/10.1126/sciadv.aaz7445
https://doi.org/10.1021/acs.analchem.9b00255	https://doi.org/10.1016/j.bios.2021.113646	https://pubs.acs.org/doi/abs/10.1021/acsami.1c13273
https://doi.org/10.1021/acs.analchem.9b00339	https://doi.org/10.1007/s00216-022-03880-4	https://doi.org/10.1016/j.foodchem.2022.134560
https://doi.org/10.1016/j.talanta.2020.121388		https://doi.org/10.1039/D4RA03665D
https://doi.org/10.1016/j.jhazmat.2020.122506
https://doi.org/10.1007/s00604-020-04410-8
https://doi.org/10.1016/j.snb.2021.129708
https://doi.org/10.1016/j.foodchem.2021.129578
https://doi.org/10.1007/s00604-021-05032-4
https://doi.org/10.1039/D1AN00621E
https://doi.org/10.1021/acs.analchem.1c04139
https://doi.org/10.1039/D0TC05990K
https://doi.org/10.1021/acsami.2c15407
https://doi.org/10.1016/j.foodchem.2022.134768
https://doi.org/10.1007/s00216-024-05378-7
https://doi.org/10.1016/j.jhazmat.2024.134967

## Sheet: LFA - Col.
Papers published by year
2017	2018	2019	2020	2021	2022	2023	2024
https://doi.org/10.1039/C7LC00036G	https://doi.org/10.1021/acs.analchem.8b00837	https://doi.org/10.1016/j.bios.2019.111407	https://doi.org/10.1016/j.microc.2020.105038	https://doi.org/10.3390/bios11100392	https://doi.org/10.1021/acs.analchem.2c03000	https://doi.org/10.1016/j.talanta.2022.123925	https://doi.org/10.1002/cbic.202300575
https://doi.org/10.1021/acs.analchem.7b03017	https://doi.org/10.1007/s00604-017-2657-6	https://doi.org/10.1016/j.bios.2019.02.049	https://doi.org/10.1109/JSEN.2020.3008566	https://doi.org/10.1016/j.bios.2020.112765	https://doi.org/10.1039/D2LC00431C	https://doi.org/10.1016/j.bios.2022.114807	https://doi.org/10.1016/j.diagmicrobio.2023.116166
https://doi.org/10.1021/acsami.7b12734		https://doi.org/10.3390/ijms20246260	https://doi.org/10.1109/JSEN.2020.3008566	https://doi.org/10.1021/acs.analchem.1c00138	https://doi.org/10.1039/D2NA00463A	https://doi.org/10.1016/j.snb.2022.133148	https://doi.org/10.1016/j.jhazmat.2023.133178
https://doi.org/10.2147/IJN.S125437		https://doi.org/10.3390/bios9040143	https://doi.org/10.1021/acsabm.0c01169	https://doi.org/10.1016/j.jhazmat.2020.123781	https://doi.org/10.1016/j.bios.2022.114449	https://doi.org/10.3390/chemosensors11010036	https://doi.org/10.1016/j.bios.2024.116046
		https://doi.org/10.1016/j.talanta.2018.09.037	https://doi.org/10.1021/acsami.0c07893	https://doi.org/10.1109/JSEN.2021.3133599	https://doi.org/10.1021/acs.bioconjchem.2c00261	https://doi.org/10.1016/j.snb.2022.132945	https://doi.org/10.1016/j.microc.2024.111313
		https://doi.org/10.1111/jfpe.12976	https://doi.org/10.1007/s00216-020-02833-z	https://doi.org/10.1111/2041-210X.13658	https://doi.org/10.1080/00032719.2022.2060998	https://doi.org/10.1016/j.jim.2023.113574	https://doi.org/10.1021/acs.analchem.4c01514
			https://doi.org/10.1016/j.mimet.2019.105800		https://doi.org/10.1007/s00216-022-03877-z	https://doi.org/10.1002/biot.202300143	https://doi.org/10.1016/j.aca.2023.342031
			https://doi.org/10.1016/j.bios.2020.112325		https://doi.org/10.1021/acsomega.2c00793	https://doi.org/10.1007/s00604-023-05960-3
			https://doi.org/10.1016/j.bios.2020.112309		https://doi.org/10.1016/j.bios.2022.114190	https://doi.org/10.1016/j.snb.2023.133580
			https://doi.org/10.1016/j.snb.2020.127750		https://doi.org/10.1016/j.bios.2022.114289	https://doi.org/10.1016/j.microc.2023.108675
			https://doi.org/10.1016/j.talanta.2019.120408			https://doi.org/10.1016/j.colsurfb.2023.113319
			https://doi.org/10.1007/s00216-020-02475-1
Smartphone brand
Apple	Samsung	Huawei	Xiaomi	Unspecified	Other
https://doi.org/10.1021/acs.analchem.2c03000	https://doi.org/10.1021/acs.analchem.2c03000	https://doi.org/10.1021/acs.analchem.8b00837	https://doi.org/10.1016/j.talanta.2022.123925	https://doi.org/10.1016/j.bios.2022.114807	https://doi.org/10.1039/D2NA00463A	OnePlus
https://doi.org/10.1039/D2LC00431C	https://doi.org/10.1016/j.bios.2022.114449	https://doi.org/10.1016/j.talanta.2022.123925	https://doi.org/10.1021/acsabm.0c01169	https://doi.org/10.1021/acs.analchem.1c00138	https://doi.org/10.1016/j.mimet.2019.105800	OnePlus
https://doi.org/10.1016/j.bios.2022.114449	https://doi.org/10.3390/bios11100392	https://doi.org/10.1016/j.bios.2022.114449	https://doi.org/10.1016/j.jhazmat.2023.133178	https://doi.org/10.1002/cbic.202300575	https://doi.org/10.3390/bios9040143	Google
https://doi.org/10.1016/j.microc.2020.105038	https://doi.org/10.1016/j.bios.2019.02.049	https://doi.org/10.1109/JSEN.2020.3008566	https://doi.org/10.1016/j.jim.2023.113574	https://doi.org/10.1016/j.jhazmat.2020.123781	https://doi.org/10.1039/C7LC00036G	LG
https://doi.org/10.1021/acs.bioconjchem.2c00261	https://doi.org/10.1109/JSEN.2020.3008566	https://doi.org/10.1016/j.snb.2022.133148	https://doi.org/10.1002/biot.202300143	https://doi.org/10.1021/acs.analchem.7b03017	https://doi.org/10.1016/j.mimet.2019.105800	LG
https://doi.org/10.1080/00032719.2022.2060998	https://doi.org/10.1007/s00216-022-03877-z	https://doi.org/10.3390/bios9040143	https://doi.org/10.1007/s00216-020-02475-1	https://doi.org/10.3390/ijms20246260	https://doi.org/10.1016/j.bios.2019.111407	Motorola
https://doi.org/10.1021/acsami.0c07893	https://doi.org/10.1021/acsomega.2c00793	https://doi.org/10.1016/j.talanta.2018.09.037		https://doi.org/10.1109/JSEN.2021.3133599	https://doi.org/10.1016/j.diagmicrobio.2023.116166	Kyocera
https://doi.org/10.1021/acsami.7b12734	https://doi.org/10.3390/chemosensors11010036	https://doi.org/10.1016/j.snb.2022.132945		https://doi.org/10.1007/s00604-017-2657-6	https://doi.org/10.1109/JSEN.2020.3008566	HTC
https://doi.org/10.1016/j.bios.2020.112309	https://doi.org/10.1109/JSEN.2020.3008566	https://doi.org/10.1021/acs.analchem.4c01514		https://doi.org/10.1016/j.bios.2022.114190	https://doi.org/10.1109/JSEN.2020.3008566	HTC
https://doi.org/10.1111/2041-210X.13658				https://doi.org/10.1007/s00216-020-02833-z	https://doi.org/10.1109/JSEN.2020.3008566	LetV
https://doi.org/10.1016/j.bios.2020.112765				https://doi.org/10.1016/j.bios.2020.112325	https://doi.org/10.1109/JSEN.2020.3008566	LetV
https://doi.org/10.1016/j.bios.2022.114289				https://doi.org/10.2147/IJN.S125437	https://doi.org/10.1016/j.snb.2020.127750	OPPO
				https://doi.org/10.1016/j.bios.2024.116046	https://doi.org/10.1016/j.talanta.2019.120408	Infocus
				https://doi.org/10.1111/jfpe.12976	https://doi.org/10.1016/j.aca.2023.342031	Alcatel
				https://doi.org/10.1016/j.microc.2024.111313	https://doi.org/10.1016/j.colsurfb.2023.113319	Realme
				https://doi.org/10.1007/s00604-023-05960-3	https://doi.org/10.1016/j.talanta.2022.123925	Realme
				https://doi.org/10.1016/j.snb.2023.133580
				https://doi.org/10.1016/j.microc.2023.108675
Measurement Modality
Colorimetric		CL	Other
https://doi.org/10.1039/C7LC00036G	https://doi.org/10.3390/chemosensors11010036	https://doi.org/10.1016/j.bios.2020.112765	https://doi.org/10.1016/j.bios.2022.114807	Photothermal
https://doi.org/10.1021/acs.analchem.2c03000	https://doi.org/10.3390/bios9040143		https://doi.org/10.1016/j.jhazmat.2020.123781	Photothermal
https://doi.org/10.1039/D2LC00431C	https://doi.org/10.1021/acsami.0c07893		https://doi.org/10.1016/j.snb.2022.132945	Photothermal
https://doi.org/10.1039/D2NA00463A	https://doi.org/10.1016/j.talanta.2018.09.037		https://doi.org/10.1016/j.microc.2023.108675	Photothermal
https://doi.org/10.1021/acs.analchem.8b00837	https://doi.org/10.1016/j.snb.2022.132945		https://doi.org/10.1016/j.bios.2024.116046	SERS (Surface enhanced ramen scattering)
https://doi.org/10.1016/j.talanta.2022.123925	https://doi.org/10.1016/j.jhazmat.2023.133178
https://doi.org/10.1016/j.bios.2022.114449	https://doi.org/10.1016/j.bios.2022.114190
https://doi.org/10.3390/bios11100392	https://doi.org/10.1021/acsami.7b12734
https://doi.org/10.1016/j.bios.2020.112765	https://doi.org/10.1007/s00216-020-02833-z
https://doi.org/10.1016/j.bios.2022.114807	https://doi.org/10.1016/j.mimet.2019.105800
https://doi.org/10.1021/acs.analchem.1c00138	https://doi.org/10.1016/j.bios.2020.112325
https://doi.org/10.1016/j.microc.2020.105038	https://doi.org/10.2147/IJN.S125437
https://doi.org/10.1021/acs.bioconjchem.2c00261	https://doi.org/10.1016/j.jim.2023.113574
https://doi.org/10.1016/j.bios.2019.111407	https://doi.org/10.1016/j.bios.2024.116046
https://doi.org/10.1002/cbic.202300575	https://doi.org/10.1002/biot.202300143
https://doi.org/10.1016/j.bios.2019.02.049	https://doi.org/10.1016/j.bios.2020.112309
https://doi.org/10.1109/JSEN.2020.3008566	https://doi.org/10.1111/jfpe.12976
https://doi.org/10.1016/j.jhazmat.2020.123781	https://doi.org/10.1016/j.microc.2024.111313
https://doi.org/10.1021/acs.analchem.7b03017	https://doi.org/10.1016/j.snb.2020.127750
https://doi.org/10.1016/j.diagmicrobio.2023.116166	https://doi.org/10.1007/s00604-023-05960-3
https://doi.org/10.1109/JSEN.2020.3008566	https://doi.org/10.1021/acs.analchem.4c01514
https://doi.org/10.3390/ijms20246260	https://doi.org/10.1016/j.talanta.2019.120408
https://doi.org/10.1080/00032719.2022.2060998	https://doi.org/10.1111/2041-210X.13658
https://doi.org/10.1109/JSEN.2021.3133599	https://doi.org/10.1016/j.snb.2023.133580
https://doi.org/10.1007/s00604-017-2657-6	https://doi.org/10.1016/j.bios.2022.114289
https://doi.org/10.1016/j.snb.2022.133148	https://doi.org/10.1016/j.microc.2023.108675
https://doi.org/10.1021/acsabm.0c01169	https://doi.org/10.1016/j.aca.2023.342031
https://doi.org/10.1007/s00216-022-03877-z	https://doi.org/10.1007/s00216-020-02475-1
https://doi.org/10.1021/acsomega.2c00793	https://doi.org/10.1016/j.colsurfb.2023.113319
Colorimetry: Contrast Generation
Dye: stain or label	Indicator dye	Chromogen (catalyzed)	AuNP	Unspecified	Other
https://doi.org/10.1021/acsabm.0c01169	https://doi.org/10.1016/j.snb.2020.127750	https://doi.org/10.3390/chemosensors11010036	https://doi.org/10.1039/C7LC00036G	https://doi.org/10.1016/j.diagmicrobio.2023.116166	https://doi.org/10.1016/j.jhazmat.2020.123781
https://doi.org/10.1109/JSEN.2021.3133599		https://doi.org/10.1002/biot.202300143	https://doi.org/10.1039/D2LC00431C		https://doi.org/10.1109/JSEN.2020.3008566
		https://doi.org/10.1016/j.bios.2020.112309	https://doi.org/10.1039/D2NA00463A		https://doi.org/10.1016/j.snb.2023.133580
		https://doi.org/10.1016/j.talanta.2019.120408	https://doi.org/10.3390/bios11100392		https://doi.org/10.1021/acs.analchem.8b00837
		https://doi.org/10.1016/j.bios.2022.114289	https://doi.org/10.1016/j.bios.2020.112765		https://doi.org/10.1016/j.jhazmat.2020.123781
		https://doi.org/10.1007/s00216-020-02475-1	https://doi.org/10.1021/acs.analchem.1c00138		https://doi.org/10.1021/acs.analchem.8b00837	PtPd NPs
		https://doi.org/10.1007/s00216-022-03877-z	https://doi.org/10.1016/j.microc.2020.105038		https://doi.org/10.1021/acsami.7b12734	PtPd NPs
			https://doi.org/10.1021/acs.bioconjchem.2c00261		https://doi.org/10.1016/j.talanta.2022.123925	Polydopamine Containing
			https://doi.org/10.1016/j.bios.2019.111407		https://doi.org/10.1016/j.bios.2022.114449	Polydopamine Containing
			https://doi.org/10.1002/cbic.202300575		https://doi.org/10.1016/j.bios.2022.114807	Cuttlefish ink NPs
			https://doi.org/10.1109/JSEN.2020.3008566		https://doi.org/10.1016/j.bios.2019.02.049	Iridium Oxide (IV) NPs
			https://doi.org/10.1021/acs.analchem.7b03017		https://doi.org/10.1021/acsabm.0c01169	Rhodium NPs
			https://doi.org/10.3390/ijms20246260		https://doi.org/10.1007/s00216-022-03877-z	Cerium Oxide NPs
			https://doi.org/10.1080/00032719.2022.2060998		https://doi.org/10.3390/bios9040143	Carbon NPs
			https://doi.org/10.1007/s00604-017-2657-6
			https://doi.org/10.1016/j.snb.2022.133148
			https://doi.org/10.1021/acsomega.2c00793
			https://doi.org/10.1021/acsami.0c07893
			https://doi.org/10.1016/j.talanta.2018.09.037
			https://doi.org/10.1016/j.snb.2022.132945
			https://doi.org/10.1016/j.bios.2022.114190
			https://doi.org/10.1007/s00216-020-02833-z
			https://doi.org/10.1016/j.bios.2020.112325
			https://doi.org/10.2147/IJN.S125437
			https://doi.org/10.1016/j.jim.2023.113574
			https://doi.org/10.1016/j.bios.2024.116046
			https://doi.org/10.1111/jfpe.12976
			https://doi.org/10.1016/j.microc.2024.111313
			https://doi.org/10.1007/s00604-023-05960-3
			https://doi.org/10.1021/acs.analchem.4c01514
			https://doi.org/10.1111/2041-210X.13658
			https://doi.org/10.1016/j.microc.2023.108675
			https://doi.org/10.1016/j.aca.2023.342031
			https://doi.org/10.1016/j.colsurfb.2023.113319
			https://doi.org/10.1021/acs.analchem.2c03000
			https://doi.org/10.1016/j.jhazmat.2023.133178
			https://doi.org/10.1016/j.mimet.2019.105800
Biorecognition Agent
Oligonucleotide	Aptamer	Antibody	Other
https://doi.org/10.1002/cbic.202300575	https://doi.org/10.1016/j.snb.2022.133148	https://doi.org/10.1039/C7LC00036G	https://doi.org/10.1021/acs.analchem.1c00138	Receptor protein
https://doi.org/10.1016/j.snb.2022.132945	https://doi.org/10.1016/j.jhazmat.2023.133178	https://doi.org/10.1039/D2LC00431C
https://doi.org/10.1016/j.bios.2024.116046		https://doi.org/10.1039/D2NA00463A
https://doi.org/10.1002/biot.202300143		https://doi.org/10.1021/acs.analchem.8b00837
https://doi.org/10.1016/j.microc.2024.111313		https://doi.org/10.1016/j.talanta.2022.123925
		https://doi.org/10.1016/j.bios.2022.114449
		https://doi.org/10.3390/bios11100392
		https://doi.org/10.1016/j.bios.2020.112765
		https://doi.org/10.1016/j.bios.2022.114807
		https://doi.org/10.1016/j.microc.2020.105038
		https://doi.org/10.1021/acs.bioconjchem.2c00261
		https://doi.org/10.1016/j.bios.2019.111407
		https://doi.org/10.1016/j.bios.2019.02.049
		https://doi.org/10.1109/JSEN.2020.3008566
		https://doi.org/10.1016/j.jhazmat.2020.123781
		https://doi.org/10.1021/acs.analchem.7b03017
		https://doi.org/10.1016/j.diagmicrobio.2023.116166
		https://doi.org/10.1109/JSEN.2020.3008566
		https://doi.org/10.3390/ijms20246260
		https://doi.org/10.1080/00032719.2022.2060998
		https://doi.org/10.1109/JSEN.2021.3133599
		https://doi.org/10.1007/s00604-017-2657-6
		https://doi.org/10.1021/acsabm.0c01169
		https://doi.org/10.1007/s00216-022-03877-z
		https://doi.org/10.1021/acsomega.2c00793
		https://doi.org/10.3390/chemosensors11010036
		https://doi.org/10.3390/bios9040143
		https://doi.org/10.1021/acsami.0c07893
		https://doi.org/10.1016/j.talanta.2018.09.037
		https://doi.org/10.1016/j.bios.2022.114190
		https://doi.org/10.1021/acsami.7b12734
		https://doi.org/10.1007/s00216-020-02833-z
		https://doi.org/10.2147/IJN.S125437
		https://doi.org/10.1016/j.jim.2023.113574
		https://doi.org/10.1111/jfpe.12976
		https://doi.org/10.1007/s00604-023-05960-3
		https://doi.org/10.1021/acs.analchem.4c01514
		https://doi.org/10.1111/2041-210X.13658
		https://doi.org/10.1016/j.snb.2023.133580
		https://doi.org/10.1016/j.microc.2023.108675
		https://doi.org/10.1016/j.aca.2023.342031
		https://doi.org/10.1007/s00216-020-02475-1
		https://doi.org/10.1016/j.colsurfb.2023.113319
		https://doi.org/10.1021/acs.analchem.2c03000
		https://doi.org/10.1016/j.mimet.2019.105800
Analyte
NA virus	NA bacteria	NA human disease	Protein	Small molecule	Bacteria sp.	Ion	pH	Other
https://doi.org/10.1016/j.bios.2024.116124	https://doi.org/10.1002/biot.202300143	https://doi.org/10.1016/j.snb.2022.132945	https://doi.org/10.1039/C7LC00036G	https://doi.org/10.1021/acs.analchem.8b00837	https://doi.org/10.1021/acs.bioconjchem.2c00261	https://doi.org/10.1021/acs.analchem.1c00138	https://doi.org/10.1021/acs.analchem.0c01099	https://doi.org/10.1021/acs.analchem.2c03000
	https://doi.org/10.1002/cbic.202300575	https://doi.org/10.1016/j.microc.2024.111313	https://doi.org/10.1021/acs.analchem.2c03000	https://doi.org/10.1016/j.talanta.2022.123925	https://doi.org/10.3390/s18114026	https://doi.org/10.1016/j.snb.2018.08.074	https://doi.org/10.3390/s19235104
	https://doi.org/10.1016/j.bios.2024.116046		https://doi.org/10.1039/D2LC00431C	https://doi.org/10.1016/j.bios.2022.114807	https://doi.org/10.1016/j.mimet.2021.106288
			https://doi.org/10.1039/D2NA00463A	https://doi.org/10.3390/s19235104	https://doi.org/10.3390/chemosensors11010036
			https://pubs.acs.org/doi/abs/10.1021/acsami.2c22616	https://doi.org/10.1016/j.jhazmat.2020.123781	https://doi.org/10.1021/acsami.7b12734
			https://doi.org/10.1021/acs.analchem.0c01099	https://doi.org/10.1021/acs.analchem.7b03017	https://doi.org/10.1016/j.mimet.2019.105800
			https://doi.org/10.1016/j.bios.2022.114449	https://doi.org/10.3390/ijms20246260	https://doi.org/10.1016/j.snb.2018.08.074
			https://doi.org/10.3390/bios11100392	https://doi.org/10.1109/JSEN.2021.3133599	https://doi.org/10.1016/j.snb.2023.133580
			https://doi.org/10.1016/j.bios.2020.112765	https://doi.org/10.1016/j.snb.2022.133148	https://doi.org/10.1016/j.colsurfb.2023.113319
			https://doi.org/10.1021/acs.analchem.1c00138	https://doi.org/10.1016/j.talanta.2018.09.037
			https://doi.org/10.3390/s19235104	https://doi.org/10.1016/j.jhazmat.2023.133178
			https://doi.org/10.1039/D3AN01189E	https://doi.org/10.1016/j.bios.2022.114190
			https://doi.org/10.1016/j.bios.2019.111407	https://doi.org/10.1007/s00216-020-02833-z
			https://doi.org/10.1016/j.bios.2019.02.049	https://doi.org/10.1016/j.bios.2020.112325
			https://doi.org/10.1109/JSEN.2020.3008566	https://doi.org/10.1016/j.snb.2018.08.074
			https://doi.org/10.1016/j.diagmicrobio.2023.116166	https://doi.org/10.1016/j.bios.2020.112309
			https://doi.org/10.1021/acsabm.0c01169	https://doi.org/10.1111/jfpe.12976
			https://doi.org/10.1007/s00216-022-03877-z	https://doi.org/10.1016/j.snb.2020.127750
			https://doi.org/10.3390/bios9040143	https://doi.org/10.1007/s00604-023-05960-3
			https://doi.org/10.1021/acsami.0c07893	https://doi.org/10.1016/j.snb.2023.134474
			https://doi.org/10.1016/j.jim.2023.113574	https://doi.org/10.1016/j.talanta.2019.120408
			https://doi.org/10.1021/acs.analchem.4c01514	https://doi.org/10.1016/j.bios.2022.114289
			https://doi.org/10.1007/s00216-020-02475-1	https://doi.org/10.1016/j.microc.2023.108675
			https://doi.org/10.1007/s00604-017-2657-6	https://doi.org/10.1016/j.aca.2023.342031
			https://doi.org/10.1080/00032719.2022.2060998	https://doi.org/10.1016/j.microc.2020.105038
				https://doi.org/10.2147/IJN.S125437
				https://doi.org/10.1109/JSEN.2020.3008566
				https://doi.org/10.1021/acsomega.2c00793
				https://doi.org/10.1111/2041-210X.13658
Format
Lateral Flow		Paper
https://doi.org/10.1039/C7LC00036G	https://doi.org/10.1007/s00216-022-03877-z	https://doi.org/10.3390/bios9040143
https://doi.org/10.1021/acs.analchem.2c03000	https://doi.org/10.1021/acsomega.2c00793	https://doi.org/10.1021/acsami.0c07893
https://doi.org/10.1039/D2LC00431C	https://doi.org/10.3390/chemosensors11010036	https://doi.org/10.1016/j.bios.2020.112325
https://doi.org/10.1039/D2NA00463A	https://doi.org/10.1016/j.talanta.2018.09.037	https://doi.org/10.1016/j.bios.2020.112309
https://doi.org/10.1021/acs.analchem.8b00837	https://doi.org/10.1016/j.snb.2022.132945	https://doi.org/10.1111/jfpe.12976
https://doi.org/10.1016/j.talanta.2022.123925	https://doi.org/10.1016/j.jhazmat.2023.133178	https://doi.org/10.1016/j.snb.2020.127750
https://doi.org/10.1016/j.bios.2022.114449	https://doi.org/10.1016/j.bios.2022.114190	https://doi.org/10.1016/j.talanta.2019.120408
https://doi.org/10.3390/bios11100392	https://doi.org/10.1021/acsami.7b12734	https://doi.org/10.1007/s00216-020-02475-1
https://doi.org/10.1016/j.bios.2020.112765	https://doi.org/10.1007/s00216-020-02833-z	https://doi.org/10.1002/biot.202300143
https://doi.org/10.1016/j.bios.2022.114807	https://doi.org/10.2147/IJN.S125437
https://doi.org/10.1021/acs.analchem.1c00138	https://doi.org/10.1016/j.jim.2023.113574
https://doi.org/10.1016/j.microc.2020.105038	https://doi.org/10.1016/j.bios.2024.116046
https://doi.org/10.1021/acs.bioconjchem.2c00261	https://doi.org/10.1007/s00604-023-05960-3
https://doi.org/10.1016/j.bios.2019.111407	https://doi.org/10.1021/acs.analchem.4c01514
https://doi.org/10.1002/cbic.202300575	https://doi.org/10.1111/2041-210X.13658
https://doi.org/10.1016/j.bios.2019.02.049	https://doi.org/10.1016/j.snb.2023.133580
https://doi.org/10.1109/JSEN.2020.3008566	https://doi.org/10.1016/j.bios.2022.114289
https://doi.org/10.1016/j.jhazmat.2020.123781	https://doi.org/10.1016/j.microc.2023.108675
https://doi.org/10.1021/acs.analchem.7b03017	https://doi.org/10.1016/j.aca.2023.342031
https://doi.org/10.3390/ijms20246260	https://doi.org/10.1016/j.colsurfb.2023.113319
https://doi.org/10.1080/00032719.2022.2060998	https://doi.org/10.1039/D3AN01189E
https://doi.org/10.1109/JSEN.2021.3133599	https://doi.org/10.1016/j.diagmicrobio.2023.116166
https://doi.org/10.1007/s00604-017-2657-6	https://doi.org/10.1016/j.mimet.2019.105800
https://doi.org/10.1016/j.snb.2022.133148	https://doi.org/10.1016/j.microc.2024.111313
https://doi.org/10.1021/acsabm.0c01169	https://doi.org/10.1109/JSEN.2020.3008566
Color Space for Analysis
RGB	HSV/HSL	Grayscale	Undefined	CIELab	Other
https://doi.org/10.1039/D2LC00431C	https://doi.org/10.1016/j.talanta.2019.120408	https://doi.org/10.1021/acs.analchem.2c03000	https://doi.org/10.1016/j.diagmicrobio.2023.116166	https://doi.org/10.3390/bios9040143	https://doi.org/10.1021/acs.analchem.8b00837	Visual Detection
https://doi.org/10.1039/D2NA00463A	https://doi.org/10.1007/s00216-020-02475-1	https://doi.org/10.1016/j.talanta.2022.123925	https://doi.org/10.1016/j.bios.2022.114807		https://doi.org/10.1021/acsami.7b12734
https://doi.org/10.3390/bios11100392	https://doi.org/10.1039/C7LC00036G	https://doi.org/10.1016/j.bios.2022.114449	https://doi.org/10.1021/acs.analchem.1c00138		https://doi.org/10.2147/IJN.S125437
https://doi.org/10.1016/j.bios.2020.112765		https://doi.org/10.3390/bios11100392	https://doi.org/10.1016/j.jhazmat.2020.123781		https://doi.org/10.1016/j.snb.2020.127750
https://doi.org/10.1021/acs.analchem.7b03017		https://doi.org/10.1016/j.microc.2020.105038	https://doi.org/10.1111/2041-210X.13658		https://doi.org/10.3390/chemosensors11010036
https://doi.org/10.1109/JSEN.2020.3008566		https://doi.org/10.1021/acs.bioconjchem.2c00261			https://doi.org/10.1016/j.bios.2024.116046
https://doi.org/10.1080/00032719.2022.2060998		https://doi.org/10.1016/j.bios.2019.111407			https://doi.org/10.1007/s00216-022-03877-z	CMYK
https://doi.org/10.1007/s00604-017-2657-6		https://doi.org/10.1002/cbic.202300575			https://doi.org/10.1002/biot.202300143	RYB
https://doi.org/10.3390/bios9040143		https://doi.org/10.1016/j.bios.2019.02.049			https://doi.org/10.1016/j.talanta.2019.120408	YCbCr
https://doi.org/10.1021/acsami.0c07893		https://doi.org/10.1109/JSEN.2020.3008566			https://doi.org/10.1016/j.snb.2023.133580	HSB
https://doi.org/10.1016/j.talanta.2018.09.037		https://doi.org/10.1109/JSEN.2020.3008566
https://doi.org/10.1016/j.bios.2022.114190		https://doi.org/10.3390/ijms20246260
https://doi.org/10.1016/j.jim.2023.113574		https://doi.org/10.1109/JSEN.2021.3133599
https://doi.org/10.1016/j.microc.2024.111313		https://doi.org/10.1016/j.snb.2022.133148
https://doi.org/10.1016/j.talanta.2019.120408		https://doi.org/10.1021/acsabm.0c01169
https://doi.org/10.1016/j.bios.2022.114289		https://doi.org/10.1021/acsomega.2c00793
https://doi.org/10.1016/j.aca.2023.342031		https://doi.org/10.1016/j.snb.2022.132945
https://doi.org/10.1007/s00216-020-02475-1		https://doi.org/10.1016/j.jhazmat.2023.133178
https://doi.org/10.1016/j.colsurfb.2023.113319		https://doi.org/10.1016/j.bios.2022.114190
		https://doi.org/10.1016/j.mimet.2019.105800
		https://doi.org/10.1016/j.bios.2020.112325
		https://doi.org/10.1016/j.jim.2023.113574
		https://doi.org/10.1016/j.bios.2020.112309
		https://doi.org/10.1111/jfpe.12976
		https://doi.org/10.1016/j.microc.2024.111313
		https://doi.org/10.1007/s00604-023-05960-3
		https://doi.org/10.1021/acs.analchem.4c01514
		https://doi.org/10.1016/j.talanta.2019.120408
		https://doi.org/10.1016/j.microc.2023.108675
		https://doi.org/10.1007/s00216-020-02475-1
		https://doi.org/10.1007/s00216-020-02833-z
Quantitation Method
Calibration		Machine learning
https://doi.org/10.3390/chemosensors11010036	https://doi.org/10.1039/C7LC00036G	https://doi.org/10.1016/j.bios.2022.114449
https://doi.org/10.3390/bios9040143	https://doi.org/10.1021/acs.analchem.2c03000
https://doi.org/10.1021/acsami.0c07893	https://doi.org/10.1039/D2LC00431C
https://doi.org/10.1016/j.talanta.2018.09.037	https://doi.org/10.1039/D2NA00463A
https://doi.org/10.1016/j.snb.2022.132945	https://doi.org/10.1021/acs.analchem.8b00837
https://doi.org/10.1016/j.jhazmat.2023.133178	https://doi.org/10.1016/j.talanta.2022.123925
https://doi.org/10.1016/j.bios.2022.114190	https://doi.org/10.1016/j.bios.2022.114449
https://doi.org/10.1021/acsami.7b12734	https://doi.org/10.3390/bios11100392
https://doi.org/10.1007/s00216-020-02833-z	https://doi.org/10.1016/j.bios.2020.112765
https://doi.org/10.1016/j.mimet.2019.105800	https://doi.org/10.1016/j.bios.2022.114807
https://doi.org/10.1016/j.bios.2020.112325	https://doi.org/10.1021/acs.analchem.1c00138
https://doi.org/10.2147/IJN.S125437	https://doi.org/10.1016/j.microc.2020.105038
https://doi.org/10.1016/j.jim.2023.113574	https://doi.org/10.1021/acs.bioconjchem.2c00261
https://doi.org/10.1016/j.bios.2024.116046	https://doi.org/10.1016/j.bios.2019.111407
https://doi.org/10.1002/biot.202300143	https://doi.org/10.1002/cbic.202300575
https://doi.org/10.1016/j.bios.2020.112309	https://doi.org/10.1016/j.bios.2019.02.049
https://doi.org/10.1111/jfpe.12976	https://doi.org/10.1109/JSEN.2020.3008566
https://doi.org/10.1016/j.microc.2024.111313	https://doi.org/10.1016/j.jhazmat.2020.123781
https://doi.org/10.1016/j.snb.2020.127750	https://doi.org/10.1021/acs.analchem.7b03017
https://doi.org/10.1007/s00604-023-05960-3	https://doi.org/10.1016/j.diagmicrobio.2023.116166
https://doi.org/10.1021/acs.analchem.4c01514	https://doi.org/10.1109/JSEN.2020.3008566
https://doi.org/10.1016/j.talanta.2019.120408	https://doi.org/10.3390/ijms20246260
https://doi.org/10.1111/2041-210X.13658	https://doi.org/10.1080/00032719.2022.2060998
https://doi.org/10.1016/j.snb.2023.133580	https://doi.org/10.1109/JSEN.2021.3133599
https://doi.org/10.1016/j.bios.2022.114289	https://doi.org/10.1007/s00604-017-2657-6
https://doi.org/10.1016/j.microc.2023.108675	https://doi.org/10.1016/j.snb.2022.133148
https://doi.org/10.1016/j.aca.2023.342031	https://doi.org/10.1021/acsabm.0c01169
https://doi.org/10.1007/s00216-020-02475-1	https://doi.org/10.1007/s00216-022-03877-z
https://doi.org/10.1016/j.colsurfb.2023.113319	https://doi.org/10.1021/acsomega.2c00793
Camera mode
Photo
https://doi.org/10.1039/C7LC00036G	https://doi.org/10.3390/chemosensors11010036
https://doi.org/10.1021/acs.analchem.2c03000	https://doi.org/10.3390/bios9040143
https://doi.org/10.1039/D2LC00431C	https://doi.org/10.1021/acsami.0c07893
https://doi.org/10.1039/D2NA00463A	https://doi.org/10.1016/j.talanta.2018.09.037
https://doi.org/10.1021/acs.analchem.8b00837	https://doi.org/10.1016/j.snb.2022.132945
https://doi.org/10.1016/j.talanta.2022.123925	https://doi.org/10.1016/j.jhazmat.2023.133178
https://doi.org/10.1016/j.bios.2022.114449	https://doi.org/10.1016/j.bios.2022.114190
https://doi.org/10.3390/bios11100392	https://doi.org/10.1021/acsami.7b12734
https://doi.org/10.1016/j.bios.2020.112765	https://doi.org/10.1007/s00216-020-02833-z
https://doi.org/10.1016/j.bios.2022.114807	https://doi.org/10.1016/j.mimet.2019.105800
https://doi.org/10.1021/acs.analchem.1c00138	https://doi.org/10.1016/j.bios.2020.112325
https://doi.org/10.1016/j.microc.2020.105038	https://doi.org/10.2147/IJN.S125437
https://doi.org/10.1021/acs.bioconjchem.2c00261	https://doi.org/10.1016/j.jim.2023.113574
https://doi.org/10.1016/j.bios.2019.111407	https://doi.org/10.1016/j.bios.2024.116046
https://doi.org/10.1002/cbic.202300575	https://doi.org/10.1002/biot.202300143
https://doi.org/10.1016/j.bios.2019.02.049	https://doi.org/10.1016/j.bios.2020.112309
https://doi.org/10.1109/JSEN.2020.3008566	https://doi.org/10.1111/jfpe.12976
https://doi.org/10.1016/j.jhazmat.2020.123781	https://doi.org/10.1016/j.microc.2024.111313
https://doi.org/10.1021/acs.analchem.7b03017	https://doi.org/10.1016/j.snb.2020.127750
https://doi.org/10.1016/j.diagmicrobio.2023.116166	https://doi.org/10.1007/s00604-023-05960-3
https://doi.org/10.1109/JSEN.2020.3008566	https://doi.org/10.1021/acs.analchem.4c01514
https://doi.org/10.3390/ijms20246260	https://doi.org/10.1016/j.talanta.2019.120408
https://doi.org/10.1080/00032719.2022.2060998	https://doi.org/10.1111/2041-210X.13658
https://doi.org/10.1109/JSEN.2021.3133599	https://doi.org/10.1016/j.snb.2023.133580
https://doi.org/10.1007/s00604-017-2657-6	https://doi.org/10.1016/j.bios.2022.114289
https://doi.org/10.1016/j.snb.2022.133148	https://doi.org/10.1016/j.microc.2023.108675
https://doi.org/10.1021/acsabm.0c01169	https://doi.org/10.1016/j.aca.2023.342031
https://doi.org/10.1007/s00216-022-03877-z	https://doi.org/10.1007/s00216-020-02475-1
https://doi.org/10.1021/acsomega.2c00793	https://doi.org/10.1016/j.colsurfb.2023.113319
Nucleic acid amplification method
RPA	RPA+CRSPR/Cas	RCA+CRISPR/CAS
https://doi.org/10.1002/cbic.202300575	https://doi.org/10.1016/j.bios.2024.116046	https://doi.org/10.1016/j.microc.2024.111313
https://doi.org/10.1002/biot.202300143
Technology Readiness
Authentic sample to answer	Authentic sample, mix of lab and portable methods	Proof of concept
https://doi.org/10.1039/D2NA00463A	https://doi.org/10.1039/C7LC00036G	https://doi.org/10.1039/D2LC00431C
https://doi.org/10.3390/bios11100392	https://doi.org/10.1021/acs.analchem.2c03000	https://doi.org/10.1021/acs.bioconjchem.2c00261
https://doi.org/10.1016/j.microc.2020.105038	https://doi.org/10.1021/acs.analchem.8b00837	https://doi.org/10.1016/j.bios.2019.111407
https://doi.org/10.1016/j.diagmicrobio.2023.116166	https://doi.org/10.1016/j.bios.2022.114449	https://doi.org/10.1002/cbic.202300575
https://doi.org/10.1080/00032719.2022.2060998	https://doi.org/10.1016/j.bios.2020.112765	https://doi.org/10.1016/j.bios.2019.02.049
https://doi.org/10.1007/s00604-017-2657-6	https://doi.org/10.1016/j.bios.2022.114807	https://doi.org/10.1021/acs.analchem.7b03017
https://doi.org/10.1021/acsami.0c07893	https://doi.org/10.1016/j.jhazmat.2020.123781	https://doi.org/10.1016/j.snb.2022.132945
https://doi.org/10.1007/s00216-020-02833-z	https://doi.org/10.1109/JSEN.2020.3008566	https://doi.org/10.1016/j.bios.2020.112325
https://doi.org/10.1111/2041-210X.13658	https://doi.org/10.3390/ijms20246260	https://doi.org/10.2147/IJN.S125437
	https://doi.org/10.1109/JSEN.2021.3133599	https://doi.org/10.1002/biot.202300143
	https://doi.org/10.1016/j.snb.2022.133148	https://doi.org/10.1016/j.snb.2023.133580
	https://doi.org/10.1007/s00216-022-03877-z
	https://doi.org/10.1021/acsomega.2c00793
	https://doi.org/10.3390/chemosensors11010036
	https://doi.org/10.1016/j.talanta.2018.09.037
	https://doi.org/10.1016/j.jhazmat.2023.133178
	https://doi.org/10.1016/j.bios.2022.114190
	https://doi.org/10.1021/acsami.7b12734
	https://doi.org/10.1016/j.mimet.2019.105800
	https://doi.org/10.1016/j.jim.2023.113574
	https://doi.org/10.1016/j.bios.2024.116046
	https://doi.org/10.1016/j.bios.2020.112309
	https://doi.org/10.1111/jfpe.12976
	https://doi.org/10.1016/j.snb.2020.127750
	https://doi.org/10.1007/s00604-023-05960-3
	https://doi.org/10.1021/acs.analchem.4c01514
	https://doi.org/10.1016/j.bios.2022.114289
	https://doi.org/10.1016/j.aca.2023.342031
	https://doi.org/10.1007/s00216-020-02475-1
	https://doi.org/10.1016/j.colsurfb.2023.113319
	https://doi.org/10.1016/j.talanta.2022.123925
	https://doi.org/10.1021/acs.analchem.1c00138
	https://doi.org/10.1109/JSEN.2020.3008566
	https://doi.org/10.1021/acsabm.0c01169
	https://doi.org/10.3390/bios9040143
	https://doi.org/10.1016/j.microc.2024.111313
	https://doi.org/10.1016/j.talanta.2019.120408
	https://doi.org/10.1016/j.microc.2023.108675

## Sheet: ELISAs
Year
2019	2020	2021	2022	2023	2024
https://doi.org/10.1016/j.snb.2018.11.071	https://doi.org/10.3390/diagnostics10010042	https://doi.org/10.1016/j.bios.2020.112776	https://doi.org/10.1016/j.talanta.2022.123567	https://doi.org/10.1039/D2AN01571D	https://doi.org/10.1016/j.bios.2023.115794
https://doi.org/10.1016/j.snb.2018.11.036		https://doi.org/10.1016/j.snb.2020.129173
https://doi.org/10.2116/analsci.18P184
Smartphone Brand
Apple	Huawei	Other	Unspecified
https://doi.org/10.1016/j.bios.2020.112776	https://doi.org/10.1039/D2AN01571D	https://doi.org/10.1016/j.snb.2018.11.071	https://doi.org/10.1016/j.snb.2020.129173
https://doi.org/10.1016/j.snb.2018.11.036			https://doi.org/10.1016/j.bios.2023.115794
https://doi.org/10.3390/diagnostics10010042
https://doi.org/10.2116/analsci.18P184
https://doi.org/10.1016/j.talanta.2022.123567
Measurement Modality
Colorimetric
https://doi.org/10.1016/j.snb.2018.11.071
https://doi.org/10.1016/j.snb.2018.11.036
https://doi.org/10.2116/analsci.18P184
https://doi.org/10.3390/diagnostics10010042
https://doi.org/10.1016/j.bios.2020.112776
https://doi.org/10.1016/j.snb.2020.129173
https://doi.org/10.1016/j.talanta.2022.123567
https://doi.org/10.1039/D2AN01571D
https://doi.org/10.1016/j.bios.2023.115794
Colorimetry: Contrast Generation
AuNP	Chromogen (catalyzed)	Dye: stain or label
https://doi.org/10.2116/analsci.18P184	https://doi.org/10.1016/j.snb.2018.11.071	https://doi.org/10.1016/j.bios.2023.115794
	https://doi.org/10.1016/j.talanta.2022.123567
	https://doi.org/10.1039/D2AN01571D
	https://doi.org/10.1016/j.snb.2018.11.036
	https://doi.org/10.3390/diagnostics10010042
	https://doi.org/10.1016/j.bios.2020.112776
	https://doi.org/10.1016/j.snb.2020.129173
Biorecognition Element
Antibody
https://doi.org/10.1016/j.snb.2018.11.071
https://doi.org/10.1016/j.snb.2018.11.036
https://doi.org/10.1016/j.bios.2020.112776
https://doi.org/10.3390/diagnostics10010042
https://doi.org/10.1016/j.snb.2020.129173
Analyte
Small molecule	Protein
https://doi.org/10.1016/j.snb.2018.11.071	https://doi.org/10.1016/j.snb.2018.11.036
https://doi.org/10.1016/j.snb.2020.129173	https://doi.org/10.1016/j.bios.2020.112776
https://doi.org/10.2116/analsci.18P184V	https://doi.org/10.3390/diagnostics10010042
https://doi.org/10.1016/j.talanta.2022.123567	https://doi.org/10.1016/j.bios.2023.115794
https://doi.org/10.1039/D2AN01571D
Format
Paper	Multi-well	Microfluidics
https://doi.org/10.1016/j.snb.2018.11.071	https://doi.org/10.1016/j.bios.2020.112776	https://doi.org/10.3390/diagnostics10010042
	https://doi.org/10.1016/j.snb.2018.11.036	https://doi.org/10.1016/j.bios.2023.115794
	https://doi.org/10.2116/analsci.18P184
	https://doi.org/10.1016/j.snb.2020.129173
	https://doi.org/10.1016/j.talanta.2022.123567
	https://doi.org/10.1039/D2AN01571D
Color Space for analysis
RGB	Undefined	Grayscale	HSV/HSL	Other
https://doi.org/10.1016/j.snb.2018.11.071	https://doi.org/10.1016/j.bios.2020.112776	https://doi.org/10.1016/j.snb.2018.11.071	https://doi.org/10.3390/diagnostics10010042	https://doi.org/10.1039/D2AN01571D
https://doi.org/10.1016/j.snb.2018.11.036		https://doi.org/10.2116/analsci.18P184
https://doi.org/10.2116/analsci.18P184		https://doi.org/10.1016/j.talanta.2022.123567
https://doi.org/10.1016/j.snb.2020.129173		https://doi.org/10.1016/j.bios.2023.115794
Quantitation method
Analytic calibration
https://doi.org/10.1016/j.snb.2018.11.071
https://doi.org/10.1016/j.snb.2018.11.036
https://doi.org/10.1016/j.bios.2020.112776
https://doi.org/10.2116/analsci.18P184
https://doi.org/10.3390/diagnostics10010042
https://doi.org/10.1016/j.snb.2020.129173
https://doi.org/10.1016/j.talanta.2022.123567
https://doi.org/10.1039/D2AN01571D
https://doi.org/10.1016/j.bios.2023.115794
Camera mode
Photograph	Video
https://doi.org/10.1016/j.snb.2018.11.071	https://doi.org/10.1016/j.snb.2018.11.036
https://doi.org/10.1016/j.bios.2020.112776	https://doi.org/10.3390/diagnostics10010042
https://doi.org/10.2116/analsci.18P184
https://doi.org/10.1016/j.snb.2020.129173
https://doi.org/10.1016/j.talanta.2022.123567
https://doi.org/10.1039/D2AN01571D
https://doi.org/10.1016/j.bios.2023.115794
Technology readiness
Aunthentic sample, mix of lab and portable methods	Proof of concept	Aunthentic sample to answer
https://doi.org/10.1016/j.snb.2018.11.071	https://doi.org/10.1016/j.snb.2018.11.036
https://doi.org/10.2116/analsci.18P184	https://doi.org/10.1016/j.bios.2023.115794
https://doi.org/10.1016/j.bios.2020.112776
https://doi.org/10.3390/diagnostics10010042
https://doi.org/10.1016/j.snb.2020.129173
https://doi.org/10.1016/j.talanta.2022.123567
https://doi.org/10.1039/D2AN01571D

## Sheet: Other ELAs
Papers published by year
2018	2019	2020	2021	2022	2023	2024
https://doi.org/10.1016/j.snb.2017.07.074	https://doi.org/10.1016/j.bios.2018.12.006	https://doi.org/10.1002/bab.1898	https://doi.org/10.1021/acs.analchem.0c04894	https://doi.org/10.1016/j.microc.2022.107185	https://doi.org/10.1021/acssensors.2c01429	https://doi.org/10.1039/D3AY02211K
https://doi.org/10.1007/s00216-018-0939-4	https://doi.org/10.1016/j.bios.2018.11.042	https://doi.org/10.1016/j.talanta.2019.120211	https://doi.org/10.1016/j.bios.2021.113569	https://doi.org/10.1038/s41551-022-00907-0
	https://doi.org/10.1016/j.talanta.2019.05.042	https://doi.org/10.1016/j.bios.2020.112095	https://doi.org/10.1038/s41467-021-21627-0	https://doi.org/10.1016/j.bios.2022.114449
		https://doi.org/10.1021/acssensors.9b02013	https://doi.org/10.1016/j.bios.2020.112817	https://doi.org/10.1016/j.microc.2022.107427
				https://doi.org/10.1021/acssensors.2c00754
				https://doi.org/10.1016/j.bios.2022.114099
				https://doi.org/10.3390/foods11182900
				https://doi.org/10.3390/bios12110980
				https://doi.org/10.1016/j.aca.2022.340445
				https://doi.org/10.3390/bios12090680
Smartphone brand
Apple	Samsung	Huawei	Xiaomi	Unspecified	Other
https://doi.org/10.1007/s00216-018-0939-4	https://doi.org/10.1016/j.bios.2022.114449	https://doi.org/10.1016/j.snb.2017.07.074	https://doi.org/10.1016/j.talanta.2019.120211	https://doi.org/10.1016/j.bios.2020.112817	https://doi.org/10.1002/bab.1898	OPPO, VIVO
https://doi.org/10.1038/s41467-021-21627-0	https://doi.org/10.1016/j.microc.2022.107427	https://doi.org/10.1021/acs.analchem.0c04894	https://doi.org/10.1002/bab.1898	https://doi.org/10.1016/j.bios.2020.112095	https://doi.org/10.1039/D3AY02211K	HTC
https://doi.org/10.1016/j.bios.2022.114449	https://doi.org/10.1016/j.microc.2022.107185	https://doi.org/10.1038/s41551-022-00907-0	https://doi.org/10.1016/j.bios.2018.12.006	https://doi.org/10.1016/j.microc.2022.107185	https://doi.org/10.1002/bab.1898	HTC
https://doi.org/10.1021/acssensors.9b02013		https://doi.org/10.1016/j.bios.2018.11.042		https://doi.org/10.1016/j.bios.2022.114099	https://doi.org/10.1016/j.bios.2021.113569	OnePlus
https://doi.org/10.1002/bab.1898		https://doi.org/10.1016/j.bios.2022.114449		https://doi.org/10.3390/foods11182900	https://doi.org/10.1016/j.bios.2021.113569	OnePlus
		https://doi.org/10.1016/j.talanta.2019.05.042		https://doi.org/10.3390/bios12110980
		https://doi.org/10.1021/acssensors.2c00754		https://doi.org/10.1016/j.aca.2022.340445
		https://doi.org/10.1002/bab.1898		https://doi.org/10.3390/bios12090680
		https://doi.org/10.1021/acs.analchem.0c04894		https://doi.org/10.1021/acssensors.2c01429
Measurement Modality
Colorimetric	PL	BL	CL
https://doi.org/10.1016/j.snb.2017.07.074	https://doi.org/10.1016/j.microc.2022.107185	https://doi.org/10.1016/j.bios.2021.113569	https://doi.org/10.1016/j.bios.2020.112817
https://doi.org/10.1002/bab.1898	https://doi.org/10.1016/j.microc.2022.107185	https://doi.org/10.1016/j.bios.2021.113569
https://doi.org/10.1016/j.talanta.2019.120211	https://doi.org/10.1016/j.aca.2022.340445
https://doi.org/10.1007/s00216-018-0939-4
https://doi.org/10.1021/acs.analchem.0c04894
https://doi.org/10.1016/j.bios.2020.112095
https://doi.org/10.1016/j.microc.2022.107185
https://doi.org/10.1038/s41467-021-21627-0
https://doi.org/10.1038/s41551-022-00907-0
https://doi.org/10.1016/j.bios.2018.12.006
https://doi.org/10.1016/j.bios.2018.11.042
https://doi.org/10.1016/j.bios.2022.114449
https://doi.org/10.1016/j.talanta.2019.05.042
https://doi.org/10.1002/bab.1898
https://doi.org/10.1016/j.talanta.2019.120211
https://doi.org/10.1021/acssensors.9b02013
https://doi.org/10.1021/acs.analchem.0c04894
https://doi.org/10.1016/j.bios.2021.113569
https://doi.org/10.1016/j.microc.2022.107185
https://doi.org/10.1016/j.microc.2022.107427
https://doi.org/10.1021/acssensors.2c00754
https://doi.org/10.1016/j.bios.2022.114099
https://doi.org/10.3390/foods11182900
https://doi.org/10.3390/bios12110980
https://doi.org/10.1016/j.aca.2022.340445
https://doi.org/10.3390/bios12090680
https://doi.org/10.1021/acssensors.2c01429
https://doi.org/10.1039/D3AY02211K
Light Source for PL measurements
LED-UV	UV lamp
https://doi.org/10.1016/j.microc.2022.107185	https://doi.org/10.1016/j.microc.2022.107185
PL: Contrast Generation
AuNC	Carbon Dots
https://doi.org/10.1016/j.aca.2022.340445	https://doi.org/10.1016/j.microc.2022.107185
	https://doi.org/10.1016/j.microc.2022.107185
Colorimetry: Contrast Generation
Dye: stain or label	Indicator dye	Chromogen (catalyzed)	AuNP	Other
https://doi.org/10.1038/s41467-021-21627-0	https://doi.org/10.1002/bab.1898	https://doi.org/10.1016/j.bios.2020.112095	https://doi.org/10.1021/acs.analchem.0c04894	https://doi.org/10.1016/j.bios.2022.114449
https://doi.org/10.1016/j.snb.2017.07.074	https://doi.org/10.1038/s41551-022-00907-0	https://doi.org/10.1016/j.microc.2022.107185	https://doi.org/10.1021/acssensors.9b02013	https://doi.org/10.1021/acs.analchem.0c04894
https://doi.org/10.1007/s00216-018-0939-4	https://doi.org/10.1016/j.bios.2018.11.042	https://doi.org/10.1016/j.bios.2018.12.006	https://doi.org/10.3390/bios12110980	https://doi.org/10.1021/acssensors.2c01429
https://doi.org/10.1016/j.talanta.2019.120211		https://doi.org/10.1016/j.talanta.2019.05.042
https://doi.org/10.1016/j.bios.2021.113569		https://doi.org/10.1016/j.bios.2020.112817
		https://doi.org/10.1016/j.microc.2022.107427
		https://doi.org/10.1021/acssensors.2c00754
		https://doi.org/10.1016/j.bios.2021.113569
		https://doi.org/10.1016/j.microc.2022.107185
		https://doi.org/10.1016/j.bios.2022.114099
		https://doi.org/10.3390/foods11182900
		https://doi.org/10.1016/j.aca.2022.340445
		https://doi.org/10.3390/bios12090680
		https://doi.org/10.1021/acssensors.2c01429
		https://doi.org/10.1039/D3AY02211K
Biorecognition Agent
Oligonucleotide	Aptamer	Antibody	Other
https://doi.org/10.1021/acs.analchem.0c04894	https://doi.org/10.1016/j.snb.2017.07.074	https://doi.org/10.1016/j.bios.2018.12.006	https://doi.org/10.1007/s00216-018-0939-4	Oxidase
https://doi.org/10.1038/s41467-021-21627-0		https://doi.org/10.1016/j.bios.2020.112817	https://doi.org/10.1016/j.talanta.2019.120211	oxidase
https://doi.org/10.1038/s41551-022-00907-0		https://doi.org/10.1016/j.bios.2018.11.042	https://doi.org/10.1016/j.bios.2020.112095	oxidase
		https://doi.org/10.1016/j.bios.2022.114449	https://doi.org/10.1016/j.bios.2021.113569	Receptor Protein
		https://doi.org/10.1016/j.talanta.2019.05.042
		https://doi.org/10.1021/acssensors.9b02013
		https://doi.org/10.1016/j.microc.2022.107427
		https://doi.org/10.1021/acssensors.2c00754
		https://doi.org/10.1016/j.bios.2022.114099
		https://doi.org/10.3390/foods11182900
		https://doi.org/10.3390/bios12110980
		https://doi.org/10.1016/j.aca.2022.340445
		https://doi.org/10.3390/bios12090680
		https://doi.org/10.1021/acssensors.2c01429
Analyte
NA virus	Protein	Small molecule	Bacteria sp.	Virus	Ion
https://doi.org/10.1038/s41467-021-21627-0	https://doi.org/10.1021/acs.analchem.0c04894	https://doi.org/10.1002/bab.1898	https://doi.org/10.1016/j.snb.2017.07.074	https://doi.org/10.1016/j.bios.2020.112817	https://doi.org/10.1016/j.bios.2021.113569
https://doi.org/10.1038/s41551-022-00907-0	https://doi.org/10.1016/j.bios.2018.12.006	https://doi.org/10.1007/s00216-018-0939-4	https://doi.org/10.1016/j.bios.2018.11.042
	https://doi.org/10.1016/j.bios.2022.114449	https://doi.org/10.1016/j.bios.2020.112095
	https://doi.org/10.1016/j.talanta.2019.05.042	https://doi.org/10.1016/j.microc.2022.107185
	https://doi.org/10.1016/j.microc.2022.107427	https://doi.org/10.1016/j.talanta.2019.120211
	https://doi.org/10.1021/acssensors.9b02013	https://doi.org/10.1016/j.bios.2022.114099
	https://doi.org/10.1021/acssensors.2c00754	https://doi.org/10.3390/foods11182900
	https://doi.org/10.1021/acssensors.2c01429	https://doi.org/10.1016/j.aca.2022.340445
	https://doi.org/10.1021/acs.analchem.0c04894	https://doi.org/10.1039/D3AY02211K
	https://doi.org/10.3390/bios12090680	https://doi.org/10.1002/bab.1898
		https://doi.org/10.1016/j.talanta.2019.120211
		https://doi.org/10.1016/j.bios.2021.113569
		https://doi.org/10.1016/j.microc.2022.107185
		https://doi.org/10.3390/bios12110980
Format
Lateral Flow	Microfluidics	Paper	Capillary	Simple	Multi-well
https://doi.org/10.1016/j.bios.2020.112817	https://doi.org/10.1016/j.talanta.2019.05.042	https://doi.org/10.1021/acs.analchem.0c04894	https://doi.org/10.1016/j.bios.2018.11.042	https://doi.org/10.1016/j.microc.2022.107185	https://doi.org/10.1002/bab.1898
https://doi.org/10.1016/j.bios.2022.114449	https://doi.org/10.1021/acssensors.2c01429	https://doi.org/10.1016/j.bios.2020.112095		https://doi.org/10.1038/s41467-021-21627-0	https://doi.org/10.1016/j.talanta.2019.120211
https://doi.org/10.3390/bios12110980		https://doi.org/10.1016/j.bios.2021.113569		https://doi.org/10.1021/acssensors.9b02013	https://doi.org/10.1021/acssensors.2c00754
		https://doi.org/10.1038/s41551-022-00907-0		https://doi.org/10.3390/foods11182900	https://doi.org/10.1016/j.aca.2022.340445
		https://doi.org/10.1016/j.snb.2017.07.074
		https://doi.org/10.1007/s00216-018-0939-4
		https://doi.org/10.1016/j.bios.2018.12.006
		https://doi.org/10.1016/j.microc.2022.107427
		https://doi.org/10.1016/j.bios.2022.114099
		https://doi.org/10.3390/bios12090680
		https://doi.org/10.1039/D3AY02211K
Color Space for Analysis
RGB	HSV/HSL	Grayscale	Undefined
https://doi.org/10.1016/j.talanta.2019.120211	https://doi.org/10.1002/bab.1898	https://doi.org/10.1007/s00216-018-0939-4	https://doi.org/10.1016/j.bios.2020.112817
https://doi.org/10.1016/j.microc.2022.107185	https://doi.org/10.1016/j.bios.2020.112095	https://doi.org/10.1016/j.snb.2017.07.074	https://doi.org/10.1021/acssensors.2c00754V
https://doi.org/10.1038/s41551-022-00907-0	https://doi.org/10.1038/s41467-021-21627-0	https://doi.org/10.1021/acssensors.2c01429	https://doi.org/10.1016/j.bios.2022.114099
https://doi.org/10.1021/acs.analchem.0c04894	https://doi.org/10.1016/j.bios.2018.11.042	https://doi.org/10.1021/acssensors.9b02013	https://doi.org/10.3390/foods11182900
https://doi.org/10.1016/j.bios.2018.12.006		https://doi.org/10.1016/j.talanta.2019.05.042	https://doi.org/10.3390/bios12110980
https://doi.org/10.1016/j.bios.2022.114449		https://doi.org/10.3390/bios12090680
https://doi.org/10.1016/j.microc.2022.107427
https://doi.org/10.1016/j.aca.2022.340445
https://doi.org/10.1021/acs.analchem.0c04894
https://doi.org/10.1016/j.bios.2021.113569
https://doi.org/10.1039/D3AY02211K
Quantitation Method
Machine learning	Calibration
https://doi.org/10.1016/j.bios.2022.114449	https://doi.org/10.1016/j.snb.2017.07.074
	https://doi.org/10.1007/s00216-018-0939-4
	https://doi.org/10.1002/bab.1898
	https://doi.org/10.1016/j.talanta.2019.120211
	https://doi.org/10.1016/j.bios.2020.112095
	https://doi.org/10.1021/acs.analchem.0c04894
	https://doi.org/10.1016/j.bios.2021.113569
	https://doi.org/10.1038/s41467-021-21627-0
	https://doi.org/10.1016/j.microc.2022.107185
	https://doi.org/10.1038/s41551-022-00907-0
	https://doi.org/10.1016/j.bios.2018.12.006
	https://doi.org/10.1016/j.bios.2020.112817
	https://doi.org/10.1016/j.bios.2018.11.042
	https://doi.org/10.1016/j.talanta.2019.05.042
	https://doi.org/10.1021/acssensors.9b02013
	https://doi.org/10.1016/j.microc.2022.107427
	https://doi.org/10.1021/acssensors.2c00754
	https://doi.org/10.1016/j.bios.2022.114099
	https://doi.org/10.3390/foods11182900
	https://doi.or'g/10.3390/bios12110980
	https://doi.org/10.1016/j.aca.2022.340445
	https://doi.org/10.3390/bios12090680
	https://doi.org/10.1021/acssensors.2c01429
	https://doi.org/10.1039/D3AY02211K
Camera mode
Photo
https://doi.org/10.1016/j.snb.2017.07.074
https://doi.org/10.1007/s00216-018-0939-4
https://doi.org/10.1002/bab.1898
https://doi.org/10.1016/j.talanta.2019.120211
https://doi.org/10.1016/j.bios.2020.112095
https://doi.org/10.1021/acs.analchem.0c04894
https://doi.org/10.1016/j.bios.2021.113569
https://doi.org/10.1038/s41467-021-21627-0
https://doi.org/10.1016/j.microc.2022.107185
https://doi.org/10.1038/s41551-022-00907-0
https://doi.org/10.1016/j.bios.2018.12.006
https://doi.org/10.1016/j.bios.2020.112817
https://doi.org/10.1016/j.bios.2018.11.042
https://doi.org/10.1016/j.bios.2022.114449
https://doi.org/10.1016/j.talanta.2019.05.042
https://doi.org/10.1021/acssensors.9b02013
https://doi.org/10.1016/j.microc.2022.107427
https://doi.org/10.1021/acssensors.2c00754
https://doi.org/10.1016/j.bios.2022.114099
https://doi.org/10.3390/foods11182900
https://doi.org/10.3390/bios12110980
https://doi.org/10.1016/j.aca.2022.340445
https://doi.org/10.3390/bios12090680
https://doi.org/10.1021/acssensors.2c01429
https://doi.org/10.1039/D3AY02211K
Nucleic acid amplification method
PCR	LAMP
https://doi.org/10.1016/j.bios.2021.113569	https://doi.org/10.1038/s41467-021-21627-0
Technology Readiness
Authentic sample to answer	Authentic sample, mix of lab and portable methods	Proof of concept
https://doi.org/10.1016/j.bios.2022.114449	https://doi.org/10.1038/s41551-022-00907-0	https://doi.org/10.1016/j.bios.2021.113569
https://doi.org/10.1016/j.talanta.2019.05.042	https://doi.org/10.1016/j.snb.2017.07.074	https://doi.org/10.1016/j.talanta.2019.120211
https://doi.org/10.1021/acssensors.2c00754	https://doi.org/10.1007/s00216-018-0939-4	https://doi.org/10.1016/j.bios.2018.11.042
https://doi.org/10.1039/D3AY02211K	https://doi.org/10.1002/bab.1898	https://doi.org/10.1016/j.bios.2022.114099
	https://doi.org/10.1016/j.bios.2020.112095	https://doi.org/10.3390/foods11182900
	https://doi.org/10.1021/acs.analchem.0c04894	https://doi.org/10.3390/bios12110980
	https://doi.org/10.1038/s41467-021-21627-0	https://doi.org/10.1016/j.aca.2022.340445
	https://doi.org/10.1016/j.microc.2022.107185	https://doi.org/10.3390/bios12090680
	https://doi.org/10.1016/j.bios.2018.12.006
	https://doi.org/10.1016/j.bios.2020.112817
	https://doi.org/10.1016/j.microc.2022.107427
	https://doi.org/10.1021/acssensors.9b02013
	https://doi.org/10.1021/acssensors.2c01429
		3		2		11

## Sheet: LSA
Year
2019	2020	2021	2022	2023	2024
https://doi.org/10.1021/acs.analchem.9b03824	https://doi.org/10.1016/j.snb.2020.128645	https://doi.org/10.1016/j.bios.2021.113099	https://doi.org/10.1016/j.sbsr.2022.100533	https://doi.org/10.1016/j.microc.2023.108707	https://doi.org/10.1021/acssensors.3c02807
https://doi.org/10.3390/s19030749		https://doi.org/10.1039/d1ra07702c	https://doi.org/10.3390/s22072646	https://doi.org/10.1016/j.snb.2023.133333	https://doi.org/10.1007/s00216-024-05200-4
		https://doi.org/10.1016/j.snb.2021.130218	https://doi.org/10.1145/3517256	https://doi.org/10.1007/s00216-023-04669-9	https://doi.org/10.1016/j.ymeth.2023.11.011
		https://doi.org/10.1039/d1ra07211k	https://doi.org/10.1039/d2ra03598g
			https://doi.org/10.1016/j.microc.2021.107075
			https://doi.org/10.1007/s43630-022-00341-w
			https://doi.org/10.1016/j.talanta.2021.122999
Smartphone Brand
Apple	Samsung	Xiaomi	Huawei	Other	Other	Unspecified
https://doi.org/10.1016/j.snb.2020.128645	https://doi.org/10.3390/s22072646	https://doi.org/10.1039/d1ra07702c	https://doi.org/10.1016/j.sbsr.2022.100533	https://doi.org/10.1016/j.snb.2020.128645	Sony	https://doi.org/10.1039/d2ra03598g
https://doi.org/10.1145/3517256	https://doi.org/10.3390/s19030749		https://doi.org/10.1021/acs.analchem.9b03824			https://doi.org/10.1016/j.talanta.2021.122999
https://doi.org/10.1016/j.bios.2021.113099	https://doi.org/10.1016/j.microc.2021.107075		https://doi.org/10.1021/acssensors.3c02807
	https://doi.org/10.1007/s43630-022-00341-w		https://doi.org/10.1016/j.snb.2021.130218
	https://doi.org/10.1016/j.microc.2023.108707		https://doi.org/10.1039/d1ra07211k
	https://doi.org/10.1016/j.snb.2023.133333		https://doi.org/10.1016/j.ymeth.2023.11.011
	https://doi.org/10.1007/s00216-024-05200-4
	https://doi.org/10.1007/s00216-023-04669-9
Measurement Modality
Light Scattering
https://doi.org/10.1016/j.sbsr.2022.100533
https://doi.org/10.1021/acs.analchem.9b03824
https://doi.org/10.1145/3517256
https://doi.org/10.1039/d2ra03598g
https://doi.org/10.1039/d1ra07702c
https://doi.org/10.1016/j.snb.2021.130218
https://doi.org/10.1016/j.microc.2021.107075
https://doi.org/10.1007/s43630-022-00341-w
https://doi.org/10.1016/j.microc.2023.108707
https://doi.org/10.1016/j.talanta.2021.122999
https://doi.org/10.1016/j.snb.2023.133333
https://doi.org/10.1007/s00216-024-05200-4
https://doi.org/10.1007/s00216-023-04669-9
https://doi.org/10.1039/d1ra07211k
https://doi.org/10.1016/j.ymeth.2023.11.011
https://doi.org/10.1016/j.snb.2020.128645
https://doi.org/10.3390/s22072646
https://doi.org/10.1016/j.bios.2021.113099
https://doi.org/10.1021/acssensors.3c02807
https://doi.org/10.3390/s19030749
Biorecognition Element
Oligonucleotide	Aptamer	Other
https://doi.org/10.1021/acssensors.3c02807	https://doi.org/10.1016/j.sbsr.2022.100533	https://doi.org/10.1016/j.snb.2020.128645
https://doi.org/10.1039/d1ra07211k	https://doi.org/10.1021/acs.analchem.9b03824
https://doi.org/10.1016/j.bios.2021.113099
Analyte
NA virus	Protein	Small molecule	Bacteria sp.	Ion	Other
https://doi.org/10.1021/acssensors.3c02807	https://doi.org/10.1021/acs.analchem.9b03824	https://doi.org/10.1016/j.sbsr.2022.100533	https://doi.org/10.3390/s22072646	https://doi.org/10.1021/acs.analchem.9b03824	https://doi.org/10.1145/3517256
		https://doi.org/10.1021/acs.analchem.9b03824	https://doi.org/10.1016/j.snb.2020.128645	https://doi.org/10.1016/j.snb.2021.130218	https://doi.org/10.3390/s19030749
		https://doi.org/10.1039/d2ra03598g		https://doi.org/10.1016/j.microc.2021.107075
		https://doi.org/10.1039/d1ra07702c		https://doi.org/10.1007/s43630-022-00341-w
		https://doi.org/10.1016/j.microc.2023.108707		https://doi.org/10.1016/j.talanta.2021.122999
		https://doi.org/10.1016/j.talanta.2021.122999		https://doi.org/10.1016/j.snb.2023.133333
		https://doi.org/10.1016/j.ymeth.2023.11.011		https://doi.org/10.1007/s00216-024-05200-4
				https://doi.org/10.1007/s00216-023-04669-9
				https://doi.org/10.1039/d1ra07211k
Assay format
Simple	Other
https://doi.org/10.1016/j.sbsr.2022.100533	https://doi.org/10.3390/s22072646
https://doi.org/10.1016/j.snb.2020.128645	https://doi.org/10.1021/acssensors.3c02807
https://doi.org/10.1021/acs.analchem.9b03824
https://doi.org/10.1016/j.bios.2021.113099
https://doi.org/10.1145/3517256
https://doi.org/10.1039/d2ra03598g
https://doi.org/10.3390/s19030749
https://doi.org/10.1039/d1ra07702c
https://doi.org/10.1016/j.snb.2021.130218
https://doi.org/10.1016/j.microc.2021.107075
https://doi.org/10.1007/s43630-022-00341-w
https://doi.org/10.1016/j.microc.2023.108707
https://doi.org/10.1016/j.talanta.2021.122999
https://doi.org/10.1016/j.snb.2023.133333
https://doi.org/10.1007/s00216-024-05200-4
https://doi.org/10.1007/s00216-023-04669-9
https://doi.org/10.1039/d1ra07211k
https://doi.org/10.1016/j.ymeth.2023.11.011
Color Space for Analysis
RGB	Grayscale	Other
https://doi.org/10.1016/j.sbsr.2022.100533	https://doi.org/10.1021/acs.analchem.9b03824	https://doi.org/10.1016/j.snb.2020.128645
https://doi.org/10.1145/3517256	https://doi.org/10.3390/s22072646	https://doi.org/10.1016/j.bios.2021.113099
	https://doi.org/10.1021/acssensors.3c02807
	https://doi.org/10.1039/d2ra03598g
	https://doi.org/10.3390/s19030749
	https://doi.org/10.1039/d1ra07702c
	https://doi.org/10.1016/j.snb.2021.130218
	https://doi.org/10.1016/j.microc.2021.107075
	https://doi.org/10.1007/s43630-022-00341-w
	https://doi.org/10.1016/j.microc.2023.108707
	https://doi.org/10.1016/j.talanta.2021.122999
	https://doi.org/10.1016/j.snb.2023.133333
	https://doi.org/10.1007/s00216-024-05200-4
	https://doi.org/10.1007/s00216-023-04669-9
	https://doi.org/10.1039/d1ra07211k
	https://doi.org/10.1016/j.ymeth.2023.11.011
Quantification Method
Machine Learning	Analytic calibration
https://doi.org/10.3390/s22072646	https://doi.org/10.1016/j.sbsr.2022.100533
https://doi.org/10.1145/3517256	https://doi.org/10.1016/j.snb.2020.128645
https://doi.org/10.1021/acssensors.3c02807	https://doi.org/10.1016/j.bios.2021.113099
	https://doi.org/10.1039/d2ra03598g
	https://doi.org/10.3390/s19030749
	https://doi.org/10.1039/d1ra07702c
	https://doi.org/10.1016/j.snb.2021.130218
	https://doi.org/10.1016/j.microc.2021.107075
	https://doi.org/10.1007/s43630-022-00341-w
	https://doi.org/10.1016/j.microc.2023.108707
	https://doi.org/10.1016/j.talanta.2021.122999
	https://doi.org/10.1016/j.snb.2023.133333
	https://doi.org/10.1007/s00216-024-05200-4
	https://doi.org/10.1007/s00216-023-04669-9
	https://doi.org/10.1039/d1ra07211k
	https://doi.org/10.1016/j.ymeth.2023.11.011
	https://doi.org/10.1021/acs.analchem.9b03824
Camera mode
Photograph	Video
https://doi.org/10.1016/j.sbsr.2022.100533	https://doi.org/10.1016/j.bios.2021.113099
https://doi.org/10.1016/j.snb.2020.128645	https://doi.org/10.1145/3517256
https://doi.org/10.1021/acs.analchem.9b03824	https://doi.org/10.3390/s19030749
https://doi.org/10.3390/s22072646
https://doi.org/10.1021/acssensors.3c02807
https://doi.org/10.1039/d2ra03598g
https://doi.org/10.1039/d1ra07702c
https://doi.org/10.1016/j.snb.2021.130218
https://doi.org/10.1016/j.microc.2021.107075
https://doi.org/10.1007/s43630-022-00341-w
https://doi.org/10.1016/j.microc.2023.108707
https://doi.org/10.1016/j.talanta.2021.122999
https://doi.org/10.1016/j.snb.2023.133333
https://doi.org/10.1007/s00216-024-05200-4
https://doi.org/10.1007/s00216-023-04669-9
https://doi.org/10.1039/d1ra07211k
https://doi.org/10.1016/j.ymeth.2023.11.011
Nucleic Acid Amplification Method
LAMP
https://doi.org/10.1016/j.bios.2021.113099
https://doi.org/10.1021/acssensors.3c02807
Technology readiness
Aunthentic sample, mix of lab and portable methods	Proof of concept	Aunthentic sample to answer
https://doi.org/10.1039/d2ra03598g	https://doi.org/10.1016/j.snb.2020.128645	https://doi.org/10.1021/acs.analchem.9b03824
https://doi.org/10.1016/j.talanta.2021.122999	https://doi.org/10.1016/j.bios.2021.113099	https://doi.org/10.1145/3517256
	https://doi.org/10.3390/s22072646	https://doi.org/10.1021/acssensors.3c02807
	https://doi.org/10.3390/s19030749	https://doi.org/10.1016/j.snb.2021.130218
	https://doi.org/10.1039/d1ra07702c	https://doi.org/10.1016/j.microc.2021.107075
	https://doi.org/10.1016/j.sbsr.2022.100533	https://doi.org/10.1007/s43630-022-00341-w
	https://doi.org/10.1016/j.ymeth.2023.11.011	https://doi.org/10.1016/j.microc.2023.108707
		https://doi.org/10.1016/j.snb.2023.133333
		https://doi.org/10.1007/s00216-024-05200-4
		https://doi.org/10.1007/s00216-023-04669-9
		https://doi.org/10.1039/d1ra07211k

## Sheet: SPR
Year
2018	2019	2020	2021	2022	2023	2024
https://doi.org/10.1021/acsami.8b17876	https://doi.org/10.1364/oe.27.025420	https://doi.org/10.1021/acs.langmuir.9b03869	https://doi.org/10.1088/1361-6404/abf5ea	https://doi.org/10.1021/acs.langmuir.2c01894	https://doi.org/10.1007/s11468-023-01813-0	https://doi.org/10.1016/j.yofte.2024.103769
	https://doi.org/10.1109/jphot.2019.2943407	https://doi.org/10.1021/acsanm.0c00475	https://doi.org/10.1109/jsen.2021.3080223	https://doi.org/10.1016/j.aca.2022.339606	https://doi.org/10.1002/smsc.202300189
	https://doi.org/10.1109/jsen.2019.2938655		https://doi.org/10.1016/j.physe.2021.114764	https://doi.org/10.1021/acssuschemeng.2c04064
			https://doi.org/10.1021/acssuschemeng.1c05437	https://doi.org/10.1039/d2lc00417h
			https://doi.org/10.1016/j.optlastec.2021.107065	https://doi.org/10.3390/s22031209
			https://doi.org/10.1016/j.physe.2021.114718	https://doi.org/10.1016/j.bios.2021.113919
Smartphone Brand
Apple	Samsung	Xiaomi	Other	Other	Unspecified
https://doi.org/10.1021/acs.langmuir.9b03869	https://doi.org/10.1088/1361-6404/abf5ea	https://doi.org/10.1109/jsen.2021.3080223	https://doi.org/10.1039/d2lc00417h	Redmi	https://doi.org/10.1364/oe.27.025420
https://doi.org/10.1016/j.physe.2021.114764	https://doi.org/10.1016/j.aca.2022.339606				https://doi.org/10.1021/acsami.8b17876
https://doi.org/10.1016/j.physe.2021.114718	https://doi.org/10.3390/s22031209				https://doi.org/10.1021/acssuschemeng.1c05437
https://doi.org/10.1007/s11468-023-01813-0	https://doi.org/10.1021/acsanm.0c00475				https://doi.org/10.1021/acs.langmuir.2c01894
https://doi.org/10.1021/acssuschemeng.2c04064					https://doi.org/10.1016/j.optlastec.2021.107065
					https://doi.org/10.1109/jphot.2019.2943407
					https://doi.org/10.1016/j.bios.2021.113919
					https://doi.org/10.1109/jsen.2019.2938655
					https://doi.org/10.1016/j.yofte.2024.103769
					https://doi.org/10.1002/smsc.202300189
Measurement Modality
SPR
https://doi.org/10.1364/oe.27.025420	https://doi.org/10.1021/acsanm.0c00475
https://doi.org/10.1088/1361-6404/abf5ea	https://doi.org/10.1007/s11468-023-01813-0
https://doi.org/10.1109/jsen.2021.3080223	https://doi.org/10.1016/j.yofte.2024.103769
https://doi.org/10.1016/j.optlastec.2021.107065	https://doi.org/10.1002/smsc.202300189
https://doi.org/10.1016/j.aca.2022.339606	https://doi.org/10.1088/1361-6404/abf5ea
https://doi.org/10.1039/d2lc00417h	https://doi.org/10.1021/acs.langmuir.9b03869
https://doi.org/10.1021/acsami.8b17876	https://doi.org/10.1016/j.physe.2021.114764
https://doi.org/10.3390/s22031209	https://doi.org/10.1021/acssuschemeng.1c05437
https://doi.org/10.1109/jphot.2019.2943407	https://doi.org/10.1021/acs.langmuir.2c01894
https://doi.org/10.1016/j.bios.2021.113919	https://doi.org/10.1021/acssuschemeng.2c04064
https://doi.org/10.1109/jsen.2019.2938655	https://doi.org/10.1016/j.physe.2021.114718
Biorecognition Element
Other	Other
https://doi.org/10.1021/acsami.8b17876	B7/Avidin
https://doi.org/10.1016/j.bios.2021.113919	Enzyme
https://doi.org/10.1002/smsc.202300189	Phenyl Boronic Acid
https://doi.org/10.1038/srep12864	Protein
https://doi.org/10.1038/srep12864	Antigen Binding
Analyte
Protein	Small Molecule	Ion	Other
https://doi.org/10.1021/acsami.8b17876	https://doi.org/10.1021/acs.langmuir.2c01894	https://doi.org/10.1109/jsen.2021.3080223	https://doi.org/10.1364/oe.27.025420
https://doi.org/10.1016/j.aca.2022.339606	https://doi.org/10.1021/acssuschemeng.2c04064	https://doi.org/10.1021/acssuschemeng.1c05437	https://doi.org/10.1088/1361-6404/abf5ea
https://doi.org/10.1039/d2lc00417h	https://doi.org/10.1016/j.bios.2021.113919	https://doi.org/10.1109/jsen.2019.2938655	https://doi.org/10.1016/j.optlastec.2021.107065
https://doi.org/10.1109/jsen.2019.2938655	https://doi.org/10.1007/s11468-023-01813-0	https://doi.org/10.1016/j.physe.2021.114764	https://doi.org/10.3390/s22031209
	https://doi.org/10.1016/j.yofte.2024.103769		https://doi.org/10.1016/j.physe.2021.114718
	https://doi.org/10.1021/acs.langmuir.9b03869		https://doi.org/10.1109/jphot.2019.2943407
	https://doi.org/10.1002/smsc.202300189		https://doi.org/10.1021/acsanm.0c00475
	https://doi.org/10.1002/smsc.202300189
	https://doi.org/10.1021/acs.langmuir.9b03869
Assay format
Microfluidics (Channel)	Capillary	Other
https://doi.org/10.1109/jsen.2019.2938655	https://doi.org/10.1364/oe.27.025420	https://doi.org/10.1021/acs.langmuir.9b03869
https://doi.org/10.1021/acsanm.0c00475	https://doi.org/10.1109/jphot.2019.2943407	https://doi.org/10.1021/acsami.8b17876
https://doi.org/10.1088/1361-6404/abf5ea		https://doi.org/10.1016/j.physe.2021.114764
https://doi.org/10.1109/jsen.2021.3080223		https://doi.org/10.1021/acssuschemeng.1c05437
https://doi.org/10.1016/j.aca.2022.339606		https://doi.org/10.1021/acs.langmuir.2c01894
https://doi.org/10.1039/d2lc00417h		https://doi.org/10.1016/j.optlastec.2021.107065
		https://doi.org/10.1021/acssuschemeng.2c04064
		https://doi.org/10.3390/s22031209
		https://doi.org/10.1016/j.physe.2021.114718
		https://doi.org/10.1016/j.bios.2021.113919
		https://doi.org/10.1016/j.yofte.2024.103769
		https://doi.org/10.1002/smsc.202300189
Color Space for analysis
RGB	Undefined	Grayscale	HSV/HSL	CIELab
https://doi.org/10.1109/jsen.2021.3080223	https://doi.org/10.1039/d2lc00417h	https://doi.org/10.1364/oe.27.025420	https://doi.org/10.1016/j.physe.2021.114764	https://doi.org/10.1021/acs.langmuir.9b03869
https://doi.org/10.1021/acsami.8b17876	https://doi.org/10.3390/s22031209	https://doi.org/10.1021/acssuschemeng.2c04064	https://doi.org/10.1021/acssuschemeng.1c05437	https://doi.org/10.1016/j.physe.2021.114718
https://doi.org/10.1016/j.optlastec.2021.107065	https://doi.org/10.1109/jsen.2019.2938655	https://doi.org/10.1109/jphot.2019.2943407	https://doi.org/10.1021/acs.langmuir.2c01894	https://doi.org/10.1021/acsanm.0c00475
https://doi.org/10.1021/acsanm.0c00475	https://doi.org/10.1007/s11468-023-01813-0	https://doi.org/10.1016/j.yofte.2024.103769	https://doi.org/10.1021/acsanm.0c00475
https://doi.org/10.1016/j.aca.2022.339606	https://doi.org/10.1002/smsc.202300189	https://doi.org/10.1088/1361-6404/abf5ea
Quantification Method
Calibration
https://doi.org/10.1364/oe.27.025420
https://doi.org/10.1088/1361-6404/abf5ea
https://doi.org/10.1109/jsen.2021.3080223
https://doi.org/10.1021/acs.langmuir.9b03869
https://doi.org/10.1021/acsami.8b17876
https://doi.org/10.1016/j.physe.2021.114764
https://doi.org/10.1021/acssuschemeng.1c05437
https://doi.org/10.1021/acs.langmuir.2c01894
https://doi.org/10.1016/j.optlastec.2021.107065
https://doi.org/10.1016/j.aca.2022.339606
https://doi.org/10.1021/acssuschemeng.2c04064
https://doi.org/10.1039/d2lc00417h
https://doi.org/10.3390/s22031209
https://doi.org/10.1016/j.physe.2021.114718
https://doi.org/10.1109/jphot.2019.2943407
https://doi.org/10.1016/j.bios.2021.113919
https://doi.org/10.1109/jsen.2019.2938655
https://doi.org/10.1021/acsanm.0c00475
https://doi.org/10.1007/s11468-023-01813-0
https://doi.org/10.1016/j.yofte.2024.103769
https://doi.org/10.1002/smsc.202300189
Camera mode
Photo	Video
https://doi.org/10.1364/oe.27.025420	https://doi.org/10.1016/j.aca.2022.339606
https://doi.org/10.1109/jsen.2021.3080223	https://doi.org/10.1088/1361-6404/abf5ea
https://doi.org/10.1021/acs.langmuir.9b03869	https://doi.org/10.1016/j.optlastec.2021.107065
https://doi.org/10.1021/acsami.8b17876
https://doi.org/10.1016/j.physe.2021.114764
https://doi.org/10.1021/acssuschemeng.1c05437
https://doi.org/10.1021/acs.langmuir.2c01894
https://doi.org/10.1021/acssuschemeng.2c04064
https://doi.org/10.1039/d2lc00417h
https://doi.org/10.3390/s22031209
https://doi.org/10.1016/j.physe.2021.114718
https://doi.org/10.1109/jphot.2019.2943407
https://doi.org/10.1016/j.bios.2021.113919
https://doi.org/10.1109/jsen.2019.2938655
https://doi.org/10.1021/acsanm.0c00475
https://doi.org/10.1007/s11468-023-01813-0
https://doi.org/10.1016/j.yofte.2024.103769
https://doi.org/10.1002/smsc.202300189
Technology Readiness
Authentic sample, mix of lab and portable methods	Proof of concept	Authentic sample to answer
https://doi.org/10.1021/acssuschemeng.2c04064	https://doi.org/10.1364/oe.27.025420	https://doi.org/10.1039/d2lc00417h
https://doi.org/10.1021/acssuschemeng.1c05437	https://doi.org/10.1088/1361-6404/abf5ea
https://doi.org/10.1016/j.bios.2021.113919	https://doi.org/10.1109/jsen.2021.3080223
	https://doi.org/10.1021/acs.langmuir.9b03869
	https://doi.org/10.1021/acsami.8b17876
	https://doi.org/10.1016/j.physe.2021.114764
	https://doi.org/10.1021/acs.langmuir.2c01894
	https://doi.org/10.1016/j.optlastec.2021.107065
	https://doi.org/10.3390/s22031209
	https://doi.org/10.1016/j.physe.2021.114718
	https://doi.org/10.1109/jphot.2019.2943407
	https://doi.org/10.1109/jsen.2019.2938655
	https://doi.org/10.1021/acsanm.0c00475
	https://doi.org/10.1007/s11468-023-01813-0
	https://doi.org/10.1016/j.yofte.2024.103769
	https://doi.org/10.1002/smsc.202300189
	https://doi.org/10.1016/j.aca.2022.339606

## Sheet: LFA - PL
Papers published by year
2017	2018	2019	2020	2021	2022	2023	2024
https://doi.org/10.1039/C6LC01167E	https://doi.org/10.1039/C7AN01799E	https://doi.org/10.1016/j.snb.2019.126849	https://doi.org/10.1039/C9AY02247C	https://doi.org/10.1016/j.talanta.2021.122427	https://doi.org/10.1016/j.microc.2022.107551	https://doi.org/10.1016/j.snb.2022.133043	https://doi.org/10.1021/acs.jafc.4c03601
https://doi.org/10.1021/acsnano.7b02466	https://doi.org/10.1021/acs.analchem.8b01241	https://doi.org/10.1016/j.talanta.2019.03.105	https://doi.org/10.1016/j.bios.2020.112178	https://doi.org/10.1002/ange.202103458	https://doi.org/10.3390/nano12010033	https://doi.org/10.1016/j.snb.2022.132956	https://doi.org/10.1016/j.foodcont.2024.110585
https://doi.org/10.1186/s11671-017-2078-9	https://doi.org/10.1016/j.bios.2018.06.002	https://doi.org/10.1016/j.aca.2018.12.043		https://doi.org/10.1016/j.snb.2020.129246	https://doi.org/10.1021/acs.analchem.2c02020	https://doi.org/10.1021/acssensors.2c02706	https://doi.org/10.1002/adfm.202316147
https://doi.org/10.1177/2211068216680163	https://doi.org/10.1021/acs.analchem.7b04601	https://doi.org/10.1021/acs.analchem.9b02881		https://doi.org/10.1016/j.foodchem.2021.130019	https://doi.org/10.1021/acsanm.2c03695	https://doi.org/10.1039/D2AN01499H	https://doi.org/10.1016/j.jhazmat.2024.134068
	https://doi.org/10.1021/acs.analchem.8b04330	https://doi.org/10.1016/j.bios.2019.111719		https://doi.org/10.1021/acs.analchem.1c03085	https://doi.org/10.1016/j.aca.2021.339388	https://doi.org/10.1021/acs.analchem.3c03569	https://doi.org/10.1021/acsami.3c17039
		https://doi.org/10.1371/journal.pntd.0007746		https://doi.org/10.1016/j.foodchem.2020.127596	https://doi.org/10.1016/j.jhazmat.2021.128034	https://doi.org/10.1016/j.microc.2023.108907	https://doi.org/10.1007/s00604-024-06241-3
				https://doi.org/10.1016/j.bios.2021.113538	https://doi.org/10.1016/j.snb.2022.132376	https://doi.org/10.1021/acs.analchem.3c02718	https://doi.org/10.1002/admt.202400238
				https://doi.org/10.1016/j.talanta.2021.122427	https://doi.org/10.1039/D2NR03325A	https://doi.org/10.1134/S0003683823060224	https://doi.org/10.1021/acs.inorgchem.4c00169
					https://doi.org/10.1016/j.saa.2022.121522		https://doi.org/10.1016/j.jhazmat.2023.133103
					https://doi.org/10.1021/acs.analchem.2c02544		https://doi.org/10.1039/D3NR05662G
					https://doi.org/10.1021/acs.analchem.2c00838		https://doi.org/10.1021/acs.analchem.4c01570
							https://doi.org/10.1016/j.microc.2024.111247
							https://doi.org/10.1016/j.bios.2024.116602
							https://doi.org/10.1016/j.foodchem.2024.140625
Smartphone brand
Apple	Samsung	Huawei	Xiaomi	Unspecified	Other
https://doi.org/10.3390/nano12010033	https://doi.org/10.1016/j.snb.2022.133043	https://doi.org/10.1021/acs.analchem.2c02020	https://doi.org/10.1016/j.bios.2019.111719	https://doi.org/10.1016/j.talanta.2019.03.105	https://doi.org/10.1016/j.aca.2018.12.043	Variety of androids
https://doi.org/10.1039/C7AN01799E	https://doi.org/10.1016/j.snb.2019.126849	https://doi.org/10.1021/acsanm.2c03695	https://doi.org/10.1016/j.snb.2022.132376	https://doi.org/10.1016/j.talanta.2021.122427	https://doi.org/10.1016/j.microc.2022.107551	OPPO
https://doi.org/10.1021/acs.analchem.8b01241	https://doi.org/10.1021/acs.analchem.9b02881	https://doi.org/10.1016/j.snb.2022.132956	https://doi.org/10.1177/2211068216680163	https://doi.org/10.1021/acssensors.2c02706	https://doi.org/10.1021/acs.analchem.8b01241	LG
https://doi.org/10.1016/j.aca.2021.339388		https://doi.org/10.1016/j.microc.2023.108907	https://doi.org/10.1016/j.microc.2024.111247	https://doi.org/10.1021/acs.jafc.4c03601	https://doi.org/10.1016/j.jhazmat.2021.128034	iQOO
https://doi.org/10.1039/C6LC01167E		https://doi.org/10.1002/ange.202103458	https://doi.org/10.1021/acsnano.7b02466	https://doi.org/10.1016/j.foodcont.2024.110585	https://doi.org/10.1016/j.foodchem.2021.130019	Meizu
https://doi.org/10.1016/j.bios.2018.06.002		https://doi.org/10.1016/j.bios.2020.112178	https://doi.org/10.1186/s11671-017-2078-9	https://doi.org/10.1016/j.jhazmat.2024.134068	https://doi.org/10.1016/j.bios.2021.113538	Vivo
https://doi.org/10.1021/acs.analchem.7b04601		https://doi.org/10.1002/adfm.202316147	https://doi.org/10.1016/j.microc.2023.108907	https://doi.org/10.1021/acsami.3c17039
https://doi.org/10.1039/C9AY02247C		https://doi.org/10.1016/j.snb.2020.129246		https://doi.org/10.1007/s00604-024-06241-3
https://doi.org/10.1002/admt.202400238		https://doi.org/10.1021/acs.analchem.3c02718		https://doi.org/10.1371/journal.pntd.0007746
https://doi.org/10.1039/D2AN01499H		https://doi.org/10.1134/S0003683823060224		https://doi.org/10.1021/acs.inorgchem.4c00169
https://doi.org/10.1016/j.jhazmat.2023.133103		https://doi.org/10.1016/j.foodchem.2020.127596		https://doi.org/10.1021/acs.analchem.3c03569
https://doi.org/10.1021/acs.analchem.1c03085		https://doi.org/10.1016/j.foodchem.2024.140625		https://doi.org/10.1039/D2NR03325A
https://doi.org/10.1039/D3NR05662G		https://doi.org/10.1016/j.talanta.2021.122427		https://doi.org/10.1021/acs.analchem.4c01570
https://doi.org/10.1016/j.saa.2022.121522				https://doi.org/10.1016/j.bios.2024.116602
				https://doi.org/10.1021/acs.analchem.2c00838
				https://doi.org/10.1021/acs.analchem.8b04330
				https://doi.org/10.1021/acs.analchem.2c02544
Measurement Modality
Colorimetric	PL		CL	BL	ECL	Other	Other
https://doi.org/10.1039/C7AN01799E	https://doi.org/10.1016/j.snb.2022.133043	https://doi.org/10.1016/j.talanta.2021.122427	https://doi.org/10.1039/D2AN01499H	https://doi.org/10.1021/acs.analchem.7b04601	https://doi.org/10.1016/j.jhazmat.2024.134068	https://doi.org/10.1016/j.bios.2024.116602	thermal imaging
https://doi.org/10.1016/j.talanta.2021.122427	https://doi.org/10.1016/j.microc.2022.107551	https://doi.org/10.1002/admt.202400238	https://doi.org/10.1016/j.bios.2024.116602
https://doi.org/10.1016/j.bios.2020.112178	https://doi.org/10.1016/j.snb.2019.126849	https://doi.org/10.1371/journal.pntd.0007746
https://doi.org/10.1016/j.jhazmat.2024.134068	https://doi.org/10.3390/nano12010033	https://doi.org/10.1016/j.jhazmat.2021.128034
https://doi.org/10.1016/j.jhazmat.2021.128034	https://doi.org/10.1016/j.talanta.2019.03.105	https://doi.org/10.1021/acs.inorgchem.4c00169
https://doi.org/10.1186/s11671-017-2078-9	https://doi.org/10.1016/j.aca.2018.12.043	https://doi.org/10.1016/j.snb.2020.129246
https://doi.org/10.1021/acs.analchem.3c03569	https://doi.org/10.1039/C7AN01799E	https://doi.org/10.1016/j.snb.2022.132376
https://doi.org/10.1016/j.saa.2022.121522	https://doi.org/10.1021/acs.analchem.8b01241	https://doi.org/10.1186/s11671-017-2078-9
https://doi.org/10.1021/acs.analchem.2c02544	https://doi.org/10.1021/acs.analchem.2c02020	https://doi.org/10.1021/acs.analchem.3c03569
https://doi.org/10.1021/acs.analchem.2c00838	https://doi.org/10.1021/acs.analchem.9b02881	https://doi.org/10.1016/j.jhazmat.2023.133103
https://doi.org/10.1016/j.bios.2021.113538	https://doi.org/10.1021/acsanm.2c03695	https://doi.org/10.1177/2211068216680163
	https://doi.org/10.1016/j.aca.2021.339388	https://doi.org/10.1039/D2NR03325A
	https://doi.org/10.1016/j.snb.2022.132956	https://doi.org/10.1039/D3NR05662G
	https://doi.org/10.1039/C6LC01167E	https://doi.org/10.1021/acs.analchem.4c01570
	https://doi.org/10.1016/j.bios.2018.06.002	https://doi.org/10.1016/j.microc.2024.111247
	https://doi.org/10.1016/j.talanta.2021.122427	https://doi.org/10.1016/j.microc.2023.108907
	https://doi.org/10.1016/j.bios.2019.111719	https://doi.org/10.1016/j.foodchem.2021.130019
	https://doi.org/10.1021/acsnano.7b02466	https://doi.org/10.1016/j.saa.2022.121522
	https://doi.org/10.1039/C9AY02247C	https://doi.org/10.1021/acs.analchem.3c02718
	https://doi.org/10.1021/acssensors.2c02706	https://doi.org/10.1021/acs.analchem.2c02544
	https://doi.org/10.1002/ange.202103458	https://doi.org/10.1021/acs.analchem.1c03085
	https://doi.org/10.1016/j.bios.2020.112178	https://doi.org/10.1134/S0003683823060224
	https://doi.org/10.1021/acs.jafc.4c03601	https://doi.org/10.1016/j.foodchem.2020.127596
	https://doi.org/10.1016/j.foodcont.2024.110585	https://doi.org/10.1021/acs.analchem.2c00838
	https://doi.org/10.1002/adfm.202316147	https://doi.org/10.1016/j.bios.2021.113538
	https://doi.org/10.1016/j.jhazmat.2024.134068	https://doi.org/10.1016/j.foodchem.2024.140625
	https://doi.org/10.1021/acsami.3c17039	https://doi.org/10.1021/acs.analchem.8b04330
	https://doi.org/10.1007/s00604-024-06241-3
Light Source for PL measurements
LED-UV	LED-V	LED-B	LED-G	LED-R	Laser-B	Smartphone flashlight	UV lamp	Other
https://doi.org/10.3390/nano12010033	https://doi.org/10.1016/j.foodchem.2020.127596	https://doi.org/10.1016/j.snb.2022.133043	https://doi.org/10.1039/D2NR03325A	https://doi.org/10.1021/acssensors.2c02706	https://doi.org/10.1016/j.bios.2018.06.002	https://doi.org/10.1016/j.talanta.2019.03.105	https://doi.org/10.1016/j.microc.2022.107551	https://doi.org/10.1039/C7AN01799E
https://doi.org/10.1016/j.aca.2018.12.043		https://doi.org/10.1016/j.snb.2019.126849	https://doi.org/10.1016/j.foodchem.2021.130019		https://doi.org/10.1021/acs.analchem.1c03085	https://doi.org/10.1016/j.aca.2021.339388	https://doi.org/10.1021/acs.analchem.9b02881	https://doi.org/10.1002/adfm.202316147
https://doi.org/10.1016/j.snb.2022.132376		https://doi.org/10.1021/acsami.3c17039				https://doi.org/10.1021/acsnano.7b02466	https://doi.org/10.1039/C6LC01167E	https://doi.org/10.1021/acs.analchem.3c03569
https://doi.org/10.1021/acs.analchem.8b01241		https://doi.org/10.1002/admt.202400238				https://doi.org/10.1007/s00604-024-06241-3	https://doi.org/10.1039/C9AY02247C	https://doi.org/10.1134/S0003683823060224
https://doi.org/10.1021/acs.analchem.2c02020						https://doi.org/10.1021/acs.inorgchem.4c00169		https://doi.org/10.1039/D3NR05662G
https://doi.org/10.1021/acsanm.2c03695						https://doi.org/10.1016/j.bios.2024.116602		https://doi.org/10.1016/j.microc.2024.111247
https://doi.org/10.1016/j.snb.2022.132956						https://doi.org/10.1021/acs.analchem.8b04330		https://doi.org/10.1016/j.saa.2022.121522
https://doi.org/10.1016/j.talanta.2021.122427								https://doi.org/10.1039/D3NR05662G
https://doi.org/10.1016/j.bios.2019.111719								https://doi.org/10.1021/acs.jafc.4c03601
https://doi.org/10.1002/ange.202103458								https://doi.org/10.1371/journal.pntd.0007746
https://doi.org/10.1016/j.bios.2020.112178
https://\doi.org/10.1016/j.foodcont.2024.110585
https://doi.org/10.1016/j.jhazmat.2024.134068
https://doi.org/10.1016/j.jhazmat.2021.128034
https://doi.org/10.1016/j.snb.2020.129246
https://doi.org/10.1016/j.snb.2022.132376
https://doi.org/10.1186/s11671-017-2078-9
https://doi.org/10.1016/j.jhazmat.2023.133103
https://doi.org/10.1177/2211068216680163
https://doi.org/10.1021/acs.analchem.4c01570
https://doi.org/10.1016/j.microc.2023.108907
https://doi.org/10.1021/acs.analchem.3c02718
https://doi.org/10.1021/acs.analchem.2c02544
https://doi.org/10.1021/acs.analchem.2c00838
https://doi.org/10.1016/j.bios.2021.113538
https://doi.org/10.1016/j.foodchem.2024.140625
https://doi.org/10.1016/j.talanta.2021.122427
PL: Contrast Generation
Fluorescent dye	QD	UCNP	AuNC	Carbon Dots	MOF	Nanocomposite	Other
https://doi.org/10.1016/j.snb.2022.133043	https://doi.org/10.1016/j.snb.2019.126849	https://doi.org/10.1016/j.talanta.2019.03.105	https://doi.org/10.1021/acsanm.2c03695	https://doi.org/10.1039/D3NR05662G	https://doi.org/10.1016/j.jhazmat.2021.128034	https://doi.org/10.1016/j.microc.2022.107551	https://doi.org/10.1021/acs.analchem.9b02881	Polymer Dots
https://doi.org/10.1021/acsami.3c17039	https://doi.org/10.3390/nano12010033	https://doi.org/10.1016/j.aca.2021.339388	https://doi.org/10.1016/j.bios.2018.06.002	https://doi.org/10.1016/j.microc.2024.111247	https://doi.org/10.1016/j.jhazmat.2023.133103	https://doi.org/10.1016/j.bios.2020.112178	https://doi.org/10.1016/j.foodcont.2024.110585	Protein
https://doi.org/10.1016/j.jhazmat.2021.128034	https://doi.org/10.1016/j.aca.2018.12.043	https://doi.org/10.1021/acsnano.7b02466	https://doi.org/10.1002/ange.202103458https://doi.org/10.1016/j.talanta.2021.122427	https://doi.org/10.1021/acs.analchem.1c03085		https://doi.org/10.1371/journal.pntd.0007746	https://doi.org/10.1039/C6LC01167E	nanophosphors
https://doi.org/10.1039/D2NR03325A	https://doi.org/10.1021/acs.analchem.8b01241	https://doi.org/10.1007/s00604-024-06241-3				https://doi.org/10.1016/j.snb.2022.132376	https://doi.org/10.1039/C9AY02247C	nanophosphors
	https://doi.org/10.1021/acs.analchem.2c02020	https://doi.org/10.1021/acs.inorgchem.4c00169				https://doi.org/10.1016/j.microc.2023.108907	https://doi.org/10.1021/acs.analchem.3c02718	Persistent luminescent NPs
	https://doi.org/10.1021/acs.analchem.9b02881	https://doi.org/10.1021/acs.analchem.8b04330				https://doi.org/10.1016/j.foodchem.2021.130019	https://doi.org/10.1016/j.talanta.2021.122427	Afterglow particles (APs)
	https://doi.org/10.1016/j.snb.2022.132956					https://doi.org/10.1134/S0003683823060224	https://doi.org/10.1021/acssensors.2c02706	Europium NPs
	https://doi.org/10.1016/j.bios.2018.06.002					https://doi.org/10.1016/j.foodchem.2020.127596	https://doi.org/10.1177/2211068216680163	Fluoro-Max fluo NPs
	https://doi.org/10.1016/j.bios.2019.111719					https://doi.org/10.1016/j.foodchem.2024.140625	https://doi.org/10.1021/acs.analchem.7b04601	Enzyme
	https://doi.org/10.1002/ange.202103458					https://doi.org/10.1021/acs.analchem.2c02020	https://doi.org/10.1039/D2AN01499H	Enzyme
	https://doi.org/10.1002/admt.202400238					https://doi.org/10.1016/j.bios.2019.111719
	https://doi.org/10.1371/journal.pntd.0007746					https://doi.org/10.1021/acsami.3c17039
	https://doi.org/10.1016/j.snb.2020.129246					https://doi.org/10.3390/nano12010033
	https://doi.org/10.1186/s11671-017-2078-9					https://doi.org/10.1021/acs.analchem.2c02020
	https://doi.org/10.1021/acs.analchem.4c01570					https://doi.org/10.1021/acsanm.2c03695
	https://doi.org/10.1016/j.saa.2022.121522					https://doi.org/10.1039/C6LC01167E
	https://doi.org/10.1021/acs.analchem.2c02544					https://doi.org/10.1039/C9AY02247C
	https://doi.org/10.1134/S0003683823060224					https://doi.org/10.1002/ange.202103458https://doi.org/10.1016/j.talanta.2021.122427
	https://doi.org/10.1016/j.foodchem.2020.127596					https://doi.org/10.1002/adfm.202316147
	https://doi.org/10.1021/acs.analchem.2c00838					https://doi.org/10.1039/D2NR03325A
	https://doi.org/10.1016/j.bios.2021.113538					https://doi.org/10.1039/C7AN01799E
	https://doi.org/10.1016/j.foodchem.2024.140625					https://doi.org/10.1016/j.jhazmat.2024.134068
	https://doi.org/10.1016/j.aca.2018.12.043					https://doi.org/10.1021/acs.analchem.3c03569
	https://doi.org/10.1016/j.talanta.2021.122427					https://doi.org/10.1016/j.bios.2024.116602
Colorimetry: Contrast Generation
Dye: stain or label	Chromogen (catalyzed)	AuNP	Other
https://doi.org/10.1021/acs.analchem.2c00838	https://doi.org/10.1016/j.jhazmat.2024.134068	https://doi.org/10.1016/j.bios.2020.112178	https://doi.org/10.1016/j.jhazmat.2024.134068	MOF
		https://doi.org/10.1016/j.talanta.2021.122427
		https://doi.org/10.1039/C7AN01799E
		https://doi.org/10.1021/acs.jafc.4c03601
		https://doi.org/10.1186/s11671-017-2078-9
		https://doi.org/10.1016/j.saa.2022.121522
		https://doi.org/10.1021/acs.analchem.2c02544
		https://doi.org/10.1021/acs.analchem.2c00838
Biorecognition Agent
Oligonucleotide	Aptamer	Antibody		Other
https://doi.org/10.1016/j.microc.2022.107551	https://doi.org/10.1016/j.aca.2021.339388	https://doi.org/10.1016/j.snb.2019.126849	https://doi.org/10.1021/acs.inorgchem.4c00169	https://doi.org/10.1039/D2NR03325A	Receptor Protein
https://doi.org/10.1016/j.talanta.2019.03.105	https://doi.org/10.1016/j.bios.2018.06.002	https://doi.org/10.3390/nano12010033	https://doi.org/10.1016/j.snb.2020.129246	https://doi.org/10.1021/acs.analchem.2c02544	Receptor Protein
https://doi.org/10.1021/acs.jafc.4c03601	https://doi.org/10.1016/j.bios.2024.116602	https://doi.org/10.1016/j.talanta.2019.03.105	https://doi.org/10.1016/j.snb.2022.132376	https://doi.org/10.1021/acs.analchem.2c00838	Peptide
https://doi.org/10.1021/acsami.3c17039	https://doi.org/10.1016/j.snb.2020.129246	https://doi.org/10.1016/j.aca.2018.12.043	https://doi.org/10.1186/s11671-017-2078-9
https://doi.org/10.1007/s00604-024-06241-3		https://doi.org/10.1039/C7AN01799E	https://doi.org/10.1039/D2AN01499H
https://doi.org/10.1016/j.snb.2019.126849		https://doi.org/10.1021/acs.analchem.8b01241	https://doi.org/10.1021/acs.analchem.3c03569
https://doi.org/10.1039/D2AN01499H		https://doi.org/10.1021/acs.analchem.2c02020	https://doi.org/10.1016/j.jhazmat.2023.133103
https://doi.org/10.1021/acs.analchem.4c01570		https://doi.org/10.1021/acs.analchem.9b02881	https://doi.org/10.1177/2211068216680163
		https://doi.org/10.1021/acsanm.2c03695	https://doi.org/10.1016/j.microc.2023.108907
		https://doi.org/10.1016/j.snb.2022.132956	https://doi.org/10.1016/j.foodchem.2021.130019
		https://doi.org/10.1016/j.talanta.2021.122427	https://doi.org/10.1016/j.saa.2022.121522
		https://doi.org/10.1021/acs.analchem.7b04601	https://doi.org/10.1021/acs.analchem.3c02718
		https://doi.org/10.1016/j.bios.2019.111719	https://doi.org/10.1021/acs.analchem.1c03085
		https://doi.org/10.1021/acsnano.7b02466	https://doi.org/10.1134/S0003683823060224
		https://doi.org/10.1039/C9AY02247C	https://doi.org/10.1016/j.bios.2024.116602
		https://doi.org/10.1021/acssensors.2c02706	https://doi.org/10.1016/j.foodchem.2020.127596
		https://doi.org/10.1002/ange.202103458	https://doi.org/10.1016/j.bios.2021.113538
		https://doi.org/10.1016/j.bios.2020.112178	https://doi.org/10.1016/j.foodchem.2024.140625
		https://doi.org/10.1016/j.foodcont.2024.110585	https://doi.org/10.1021/acs.analchem.8b04330
		https://doi.org/10.1002/adfm.202316147	https://doi.org/10.1021/acs.analchem.2c02544
		https://doi.org/10.1016/j.jhazmat.2024.134068	https://doi.org/10.1039/C6LC01167E
		https://doi.org/10.1002/admt.202400238	https://doi.org/10.1016/j.talanta.2021.122427
		https://doi.org/10.1371/journal.pntd.0007746
Analyte
NA virus	NA bacteria	NA human disease	Protein	Small molecule	Bacteria sp.	Ion	Other
https://doi.org/10.1016/j.talanta.2019.03.105	https://doi.org/10.1016/j.snb.2019.126849	https://doi.org/10.1016/j.microc.2022.107551	https://doi.org/10.3390/nano12010033	https://doi.org/10.1016/j.snb.2022.133043	https://doi.org/10.1016/j.talanta.2019.03.105	https://doi.org/10.1016/j.talanta.2019.03.105	https://doi.org/10.1021/acssensors.2c02706
https://doi.org/10.1021/acsami.3c17039	https://doi.org/10.1021/acs.jafc.4c03601		https://doi.org/10.1016/j.talanta.2019.03.105	https://doi.org/10.1016/j.talanta.2019.03.105	https://doi.org/10.1016/j.aca.2021.339388	https://doi.org/10.1016/j.aca.2021.339388
https://doi.org/10.1007/s00604-024-06241-3			https://doi.org/10.1016/j.aca.2018.12.043	https://doi.org/10.1021/acs.analchem.2c02020	https://doi.org/10.1016/j.jhazmat.2021.128034	https://doi.org/10.1016/j.microc.2024.111247
https://doi.org/10.1021/acs.analchem.4c01570			https://doi.org/10.1177/2211068216680163	https://doi.org/10.1016/j.aca.2021.339388	https://doi.org/10.1016/j.snb.2022.132376
			https://doi.org/10.1021/acs.analchem.8b01241	https://doi.org/10.1016/j.snb.2022.132956
			https://doi.org/10.1021/acs.analchem.9b02881	https://doi.org/10.1021/acs.analchem.7b04601
			https://doi.org/10.1021/acsanm.2c03695	https://doi.org/10.1016/j.bios.2020.112178
			https://doi.org/10.1039/C6LC01167E	https://doi.org/10.1016/j.foodcont.2024.110585
			https://doi.org/10.1021/acsnano.7b02466	https://doi.org/10.1016/j.jhazmat.2024.134068
			https://doi.org/10.1016/j.bios.2019.111719	https://doi.org/10.1021/acs.analchem.3c03569
			https://doi.org/10.1021/acsnano.7b02466	https://doi.org/10.1016/j.jhazmat.2023.133103
			https://doi.org/10.1039/C9AY02247C	https://doi.org/10.1039/D2NR03325A
			https://doi.org/10.1002/ange.202103458	https://doi.org/10.1039/D3NR05662G
			https://doi.org/10.1002/adfm.202316147	https://doi.org/10.1016/j.foodchem.2021.130019
			https://doi.org/10.1002/admt.202400238	https://doi.org/10.1021/acs.analchem.3c02718
			https://doi.org/10.1371/journal.pntd.0007746	https://doi.org/10.1021/acs.analchem.2c02544
			https://doi.org/10.1021/acs.inorgchem.4c00169	https://doi.org/10.1021/acs.analchem.1c03085
			https://doi.org/10.1016/j.snb.2020.129246	https://doi.org/10.1016/j.talanta.2021.122427
			https://doi.org/10.1186/s11671-017-2078-9	https://doi.org/10.1016/j.foodchem.2020.127596
			https://doi.org/10.1039/D2AN01499H	https://doi.org/10.1021/acs.analchem.2c00838
			https://doi.org/10.1016/j.microc.2023.108907	https://doi.org/10.1016/j.bios.2021.113538
			https://doi.org/10.1016/j.saa.2022.121522	https://doi.org/10.1016/j.foodchem.2024.140625
			https://doi.org/10.1021/acs.analchem.8b04330
			https://doi.org/10.1134/S0003683823060224
			https://doi.org/10.1016/j.bios.2024.116602
			https://doi.org/10.1039/C7AN01799E
			https://doi.org/10.1016/j.talanta.2021.122427
Format
Lateral Flow		Paper	Simple	Multi-well	Other
https://doi.org/10.1016/j.microc.2022.107551	https://doi.org/10.1007/s00604-024-06241-3	https://doi.org/10.1016/j.snb.2022.133043	https://doi.org/10.1016/j.snb.2022.133043	https://doi.org/10.1016/j.microc.2022.107551	https://doi.org/10.1016/j.microc.2023.108907
https://doi.org/10.1016/j.snb.2019.126849	https://doi.org/10.1002/admt.202400238	https://doi.org/10.1039/D2NR03325A	https://doi.org/10.1021/acs.analchem.2c02020	https://doi.org/10.1039/C7AN01799E	https://doi.org/10.1016/j.bios.2024.116602
https://doi.org/10.3390/nano12010033	https://doi.org/10.1371/journal.pntd.0007746	https://doi.org/10.1021/acs.analchem.3c02718	https://doi.org/10.1016/j.bios.2019.111719	https://doi.org/10.1021/acs.analchem.8b01241
https://doi.org/10.1016/j.talanta.2019.03.105	https://doi.org/10.1016/j.jhazmat.2021.128034		https://doi.org/10.1039/D2AN01499H	https://doi.org/10.1016/j.snb.2022.132956
https://doi.org/10.1016/j.aca.2018.12.043	https://doi.org/10.1021/acs.inorgchem.4c00169		https://doi.org/10.1039/D2NR03325A	https://doi.org/10.1021/acssensors.2c02706
https://doi.org/10.1039/C7AN01799E	https://doi.org/10.1016/j.snb.2020.129246			https://doi.org/10.1016/j.snb.2020.129246
https://doi.org/10.1021/acs.analchem.8b01241	https://doi.org/10.1016/j.snb.2022.132376			https://doi.org/10.1021/acs.analchem.3c03569
https://doi.org/10.1021/acs.analchem.2c02020	https://doi.org/10.1186/s11671-017-2078-9			https://doi.org/10.1016/j.jhazmat.2023.133103
https://doi.org/10.1021/acs.analchem.9b02881	https://doi.org/10.1039/D2AN01499H			https://doi.org/10.1021/acs.analchem.2c02544
https://doi.org/10.1021/acsanm.2c03695	https://doi.org/10.1021/acs.analchem.3c03569			https://doi.org/10.1016/j.foodchem.2024.140625
https://doi.org/10.1016/j.aca.2021.339388	https://doi.org/10.1016/j.jhazmat.2023.133103
https://doi.org/10.1016/j.snb.2022.132956	https://doi.org/10.1177/2211068216680163
https://doi.org/10.1039/C6LC01167E	https://doi.org/10.1039/D3NR05662G
https://doi.org/10.1016/j.bios.2018.06.002	https://doi.org/10.1021/acs.analchem.4c01570
https://doi.org/10.1016/j.talanta.2021.122427	https://doi.org/10.1016/j.microc.2024.111247
https://doi.org/10.1021/acs.analchem.7b04601	https://doi.org/10.1016/j.foodchem.2021.130019
https://doi.org/10.1016/j.bios.2019.111719	https://doi.org/10.1016/j.saa.2022.121522
https://doi.org/10.1021/acsnano.7b02466	https://doi.org/10.1021/acs.analchem.3c02718
https://doi.org/10.1039/C9AY02247C	https://doi.org/10.1021/acs.analchem.2c02544
https://doi.org/10.1021/acssensors.2c02706	https://doi.org/10.1021/acs.analchem.1c03085
https://doi.org/10.1002/ange.202103458	https://doi.org/10.1134/S0003683823060224
https://doi.org/10.1016/j.bios.2020.112178	https://doi.org/10.1016/j.foodchem.2020.127596
https://doi.org/10.1021/acs.jafc.4c03601	https://doi.org/10.1021/acs.analchem.2c00838
https://doi.org/10.1016/j.foodcont.2024.110585	https://doi.org/10.1016/j.bios.2021.113538
https://doi.org/10.1002/adfm.202316147	https://doi.org/10.1016/j.foodchem.2024.140625
https://doi.org/10.1016/j.jhazmat.2024.134068	https://doi.org/10.1021/acs.analchem.8b04330
https://doi.org/10.1021/acsami.3c17039	https://doi.org/10.1016/j.talanta.2021.122427
Color Space for Analysis
RGB	HSV/HSL	Grayscale	Undefined	CIELab	Other
https://doi.org/10.1016/j.microc.2022.107551	https://doi.org/10.1002/ange.202103458	https://doi.org/10.1016/j.snb.2019.126849	https://doi.org/10.1021/acs.analchem.1c03085	https://doi.org/10.1002/adfm.202316147	https://doi.org/10.1016/j.snb.2022.133043
https://doi.org/10.3390/nano12010033	https://doi.org/10.1002/adfm.202316147	https://doi.org/10.1016/j.aca.2021.339388	https://doi.org/10.1016/j.foodchem.2020.127596		https://doi.org/10.1021/acs.analchem.2c00838
https://doi.org/10.1016/j.talanta.2019.03.105	https://doi.org/10.1016/j.talanta.2021.122427	https://doi.org/10.1016/j.bios.2018.06.002	https://doi.org/10.1021/acssensors.2c02706
https://doi.org/10.1016/j.aca.2018.12.043		https://doi.org/10.1016/j.talanta.2021.122427	https://doi.org/10.1021/acs.jafc.4c03601
https://doi.org/10.1039/C7AN01799E		https://doi.org/10.1021/acs.analchem.7b04601
https://doi.org/10.1021/acs.analchem.8b01241		https://doi.org/10.1016/j.foodcont.2024.110585
https://doi.org/10.1021/acs.analchem.2c02020		https://doi.org/10.1021/acsami.3c17039
https://doi.org/10.1021/acs.analchem.9b02881		https://doi.org/10.1007/s00604-024-06241-3
https://doi.org/10.1021/acsanm.2c03695		https://doi.org/10.1002/admt.202400238
https://doi.org/10.1016/j.snb.2022.132956		https://doi.org/10.1371/journal.pntd.0007746
https://doi.org/10.1039/C6LC01167E		https://doi.org/10.1016/j.snb.2022.132376
https://doi.org/10.1016/j.bios.2019.111719		https://doi.org/10.1039/D2AN01499H
https://doi.org/10.1021/acsnano.7b02466		https://doi.org/10.1177/2211068216680163
https://doi.org/10.1039/C9AY02247C		https://doi.org/10.1039/D2NR03325A
https://doi.org/10.1016/j.bios.2020.112178		https://doi.org/10.1021/acs.analchem.4c01570
https://doi.org/10.1002/adfm.202316147		https://doi.org/10.1016/j.foodchem.2021.130019
https://doi.org/10.1016/j.jhazmat.2024.134068		https://doi.org/10.1021/acs.analchem.2c02544
https://doi.org/10.1016/j.jhazmat.2021.128034		https://doi.org/10.1134/S0003683823060224
https://doi.org/10.1021/acs.inorgchem.4c00169		https://doi.org/10.1021/acs.analchem.2c00838
https://doi.org/10.1016/j.snb.2020.129246
https://doi.org/10.1186/s11671-017-2078-9
https://doi.org/10.1021/acs.analchem.3c03569
https://doi.org/10.1016/j.jhazmat.2023.133103
https://doi.org/10.1039/D3NR05662G
https://doi.org/10.1016/j.microc.2024.111247
https://doi.org/10.1016/j.microc.2023.108907
https://doi.org/10.1016/j.saa.2022.121522
https://doi.org/10.1021/acs.analchem.3c02718
https://doi.org/10.1016/j.bios.2024.116602
https://doi.org/10.1021/acs.analchem.2c00838
https://doi.org/10.1016/j.bios.2021.113538
https://doi.org/10.1016/j.foodchem.2024.140625
https://doi.org/10.1021/acs.analchem.8b04330
Quantitation Method
Calibration
https://doi.org/10.1002/admt.202400238	https://doi.org/10.1016/j.snb.2022.133043
https://doi.org/10.1371/journal.pntd.0007746	https://doi.org/10.1016/j.microc.2022.107551
https://doi.org/10.1016/j.jhazmat.2021.128034	https://doi.org/10.1016/j.snb.2019.126849
https://doi.org/10.1021/acs.inorgchem.4c00169	https://doi.org/10.3390/nano12010033
https://doi.org/10.1016/j.snb.2020.129246	https://doi.org/10.1016/j.talanta.2019.03.105
https://doi.org/10.1016/j.snb.2022.132376	https://doi.org/10.1016/j.aca.2018.12.043
https://doi.org/10.1186/s11671-017-2078-9	https://doi.org/10.1039/C7AN01799E
https://doi.org/10.1039/D2AN01499H	https://doi.org/10.1021/acs.analchem.8b01241
https://doi.org/10.1021/acs.analchem.3c03569	https://doi.org/10.1021/acs.analchem.2c02020
https://doi.org/10.1016/j.jhazmat.2023.133103	https://doi.org/10.1021/acs.analchem.9b02881
https://doi.org/10.1177/2211068216680163	https://doi.org/10.1021/acsanm.2c03695
https://doi.org/10.1039/D2NR03325A	https://doi.org/10.1016/j.aca.2021.339388
https://doi.org/10.1039/D3NR05662G	https://doi.org/10.1016/j.snb.2022.132956
https://doi.org/10.1021/acs.analchem.4c01570	https://doi.org/10.1039/C6LC01167E
https://doi.org/10.1016/j.microc.2024.111247	https://doi.org/10.1016/j.bios.2018.06.002
https://doi.org/10.1016/j.microc.2023.108907	https://doi.org/10.1016/j.talanta.2021.122427
https://doi.org/10.1016/j.foodchem.2021.130019	https://doi.org/10.1021/acs.analchem.7b04601
https://doi.org/10.1016/j.saa.2022.121522	https://doi.org/10.1016/j.bios.2019.111719
https://doi.org/10.1021/acs.analchem.3c02718	https://doi.org/10.1021/acsnano.7b02466
https://doi.org/10.1021/acs.analchem.2c02544	https://doi.org/10.1039/C9AY02247C
https://doi.org/10.1021/acs.analchem.1c03085	https://doi.org/10.1021/acssensors.2c02706
https://doi.org/10.1134/S0003683823060224	https://doi.org/10.1002/ange.202103458
https://doi.org/10.1016/j.bios.2024.116602	https://doi.org/10.1016/j.bios.2020.112178
https://doi.org/10.1016/j.foodchem.2020.127596	https://doi.org/10.1021/acs.jafc.4c03601
https://doi.org/10.1021/acs.analchem.2c00838	https://doi.org/10.1016/j.foodcont.2024.110585
https://doi.org/10.1016/j.bios.2021.113538	https://doi.org/10.1002/adfm.202316147
https://doi.org/10.1016/j.foodchem.2024.140625	https://doi.org/10.1016/j.jhazmat.2024.134068
https://doi.org/10.1021/acs.analchem.8b04330	https://doi.org/10.1021/acsami.3c17039
https://doi.org/10.1016/j.talanta.2021.122427	https://doi.org/10.1007/s00604-024-06241-3
Camera mode
Photo
https://doi.org/10.1016/j.snb.2022.133043	https://doi.org/10.1002/admt.202400238
https://doi.org/10.1016/j.microc.2022.107551	https://doi.org/10.1371/journal.pntd.0007746
https://doi.org/10.1016/j.snb.2019.126849	https://doi.org/10.1016/j.jhazmat.2021.128034
https://doi.org/10.3390/nano12010033	https://doi.org/10.1021/acs.inorgchem.4c00169
https://doi.org/10.1016/j.talanta.2019.03.105	https://doi.org/10.1016/j.snb.2020.129246
https://doi.org/10.1016/j.aca.2018.12.043	https://doi.org/10.1016/j.snb.2022.132376
https://doi.org/10.1039/C7AN01799E	https://doi.org/10.1186/s11671-017-2078-9
https://doi.org/10.1021/acs.analchem.8b01241	https://doi.org/10.1039/D2AN01499H
https://doi.org/10.1021/acs.analchem.2c02020	https://doi.org/10.1021/acs.analchem.3c03569
https://doi.org/10.1021/acs.analchem.9b02881	https://doi.org/10.1016/j.jhazmat.2023.133103
https://doi.org/10.1021/acsanm.2c03695	https://doi.org/10.1177/2211068216680163
https://doi.org/10.1016/j.aca.2021.339388	https://doi.org/10.1039/D2NR03325A
https://doi.org/10.1016/j.snb.2022.132956	https://doi.org/10.1039/D3NR05662G
https://doi.org/10.1039/C6LC01167E	https://doi.org/10.1021/acs.analchem.4c01570
https://doi.org/10.1016/j.bios.2018.06.002	https://doi.org/10.1016/j.microc.2024.111247
https://doi.org/10.1016/j.talanta.2021.122427	https://doi.org/10.1016/j.microc.2023.108907
https://doi.org/10.1021/acs.analchem.7b04601	https://doi.org/10.1016/j.foodchem.2021.130019
https://doi.org/10.1016/j.bios.2019.111719	https://doi.org/10.1016/j.saa.2022.121522
https://doi.org/10.1021/acsnano.7b02466	https://doi.org/10.1021/acs.analchem.3c02718
https://doi.org/10.1039/C9AY02247C	https://doi.org/10.1021/acs.analchem.1c03085
https://doi.org/10.1021/acssensors.2c02706	https://doi.org/10.1134/S0003683823060224
https://doi.org/10.1002/ange.202103458	https://doi.org/10.1016/j.bios.2024.116602
https://doi.org/10.1016/j.bios.2020.112178	https://doi.org/10.1016/j.foodchem.2020.127596
https://doi.org/10.1021/acs.jafc.4c03601	https://doi.org/10.1021/acs.analchem.2c00838
https://doi.org/10.1016/j.foodcont.2024.110585	https://doi.org/10.1016/j.bios.2021.113538
https://doi.org/10.1002/adfm.202316147	https://doi.org/10.1016/j.foodchem.2024.140625
https://doi.org/10.1016/j.jhazmat.2024.134068	https://doi.org/10.1021/acs.analchem.8b04330
https://doi.org/10.1021/acsami.3c17039	https://doi.org/10.1021/acs.analchem.2c02544
https://doi.org/10.1007/s00604-024-06241-3	https://doi.org/10.1016/j.talanta.2021.122427
Nucleic acid amplification method
PCR	RPA+CRSPR/Cas	RCA	CRISPR/Cas	Other
https://doi.org/10.1016/j.snb.2019.126849	https://doi.org/10.1021/acs.jafc.4c03601	https://doi.org/10.1016/j.microc.2022.107551	https://doi.org/10.1021/acsami.3c17039	https://doi.org/10.1021/acs.analchem.4c01570	RTF-EXPAR
https://doi.org/10.1007/s00604-024-06241-3
Technology Readiness
Authentic sample to answer	Authentic sample, mix of lab and portable methods	Proof of concept
https://doi.org/10.1016/j.talanta.2019.03.105	https://doi.org/10.1016/j.snb.2022.133043	https://doi.org/10.1016/j.microc.2022.107551
https://doi.org/10.1016/j.aca.2018.12.043	https://doi.org/10.3390/nano12010033	https://doi.org/10.1016/j.snb.2019.126849
https://doi.org/10.1016/j.aca.2021.339388	https://doi.org/10.1039/C7AN01799E	https://doi.org/10.1021/acs.analchem.8b01241
https://doi.org/10.1371/journal.pntd.0007746	https://doi.org/10.1021/acs.analchem.2c02020	https://doi.org/10.1021/acs.analchem.9b02881
https://doi.org/10.1016/j.microc.2023.108907	https://doi.org/10.1021/acsanm.2c03695	https://doi.org/10.1039/C6LC01167E
	https://doi.org/10.1016/j.snb.2022.132956	https://doi.org/10.1021/acs.analchem.7b04601
	https://doi.org/10.1016/j.bios.2018.06.002	https://doi.org/10.1016/j.bios.2019.111719
	https://doi.org/10.1016/j.talanta.2021.122427	https://doi.org/10.1039/C9AY02247C
	https://doi.org/10.1021/acsnano.7b02466	https://doi.org/10.1002/adfm.202316147
	https://doi.org/10.1021/acssensors.2c02706	https://doi.org/10.1021/acsami.3c17039
	https://doi.org/10.1002/ange.202103458	https://doi.org/10.1002/admt.202400238
	https://doi.org/10.1016/j.bios.2020.112178	https://doi.org/10.1186/s11671-017-2078-9
	https://doi.org/10.1016/j.foodcont.2024.110585	https://doi.org/10.1016/j.bios.2024.116602
	https://doi.org/10.1016/j.jhazmat.2024.134068	https://doi.org/10.1021/acs.analchem.8b04330
	https://doi.org/10.1007/s00604-024-06241-3
	https://doi.org/10.1016/j.jhazmat.2021.128034
	https://doi.org/10.1021/acs.inorgchem.4c00169
	https://doi.org/10.1016/j.snb.2020.129246
	https://doi.org/10.1016/j.snb.2022.132376
	https://doi.org/10.1039/D2AN01499H
	https://doi.org/10.1021/acs.analchem.3c03569
	https://doi.org/10.1016/j.jhazmat.2023.133103
	https://doi.org/10.1177/2211068216680163
	https://doi.org/10.1039/D2NR03325A
	https://doi.org/10.1039/D3NR05662G
	https://doi.org/10.1021/acs.analchem.4c01570
	https://doi.org/10.1016/j.microc.2024.111247
	https://doi.org/10.1016/j.foodchem.2021.130019
	https://doi.org/10.1016/j.saa.2022.121522
	https://doi.org/10.1021/acs.analchem.3c02718
	https://doi.org/10.1021/acs.analchem.2c02544
	https://doi.org/10.1021/acs.analchem.1c03085
	https://doi.org/10.1134/S0003683823060224
	https://doi.org/10.1016/j.foodchem.2020.127596
	https://doi.org/10.1021/acs.analchem.2c00838
	https://doi.org/10.1016/j.bios.2021.113538
	https://doi.org/10.1016/j.foodchem.2024.140625
	https://doi.org/10.1021/acs.jafc.4c03601
	https://doi.org/10.1016/j.talanta.2021.122427

[truncated: 11 more sheets: Other Imuno. - PL, Cell-Bac. No Micro., NA Assays, BL, CL, ECL, Col. - Micro., PL - Micro., Abs. - Spec., PL - Spec., Microfluidics]
